# Supplementary material for: Tunable C–H arylation and acylation of azoles with carboxylic acids by Pd/Cu cooperative catalysis
Source: Royal Society of Chemistry journal article supplement (doi:10.1039/d1qo00380a), 2021-01-01

## Supporting Information

### **Tunable C-H Arylation and Acylation of Azoles with Carboxylic Acids by Pd/Cu Cooperative Catalysis**

Kang Xiang, Shuo Zhang, Long Liu, Tianzeng Huang, Zhi Tang, Chunya  
Li, Kaiqiang Xu, and Tieqiao Chen\*

Key Laboratory of Ministry of Education for Advanced Materials in Tropical Island Resources, Hainan Provincial Key Lab of Fine Chem, Hainan Provincial Fine Chemical Engineering Research Center, Hainan University, Haikou, 570228, China.

## Table of Contents

|                                                                                                                      |         |
|----------------------------------------------------------------------------------------------------------------------|---------|
| <b>1. General Information</b>                                                                                        | S2      |
| <b>2. Optimization of Reaction Conditions</b>                                                                        | S3      |
| <b>3. General Experimental Procedures</b>                                                                            | S4-S21  |
| <b>4. Reference</b>                                                                                                  | S22     |
| <b>5. <math>^1\text{H}</math>, <math>^{13}\text{C}</math> and <math>^{19}\text{F}</math> NMR Spectra of Products</b> | S23-S87 |

## 1. General Information

All products reported in the manuscript have been previously described in literature unless noted otherwise. The reactions were carried out in Schlenk tube of 25 mL under N<sub>2</sub> atmosphere. Reagents were used as received unless otherwise noted, and solvents were purified according to the standard operation procedures.

UV-Vis absorption was recorded at room temperature on a Jiapeng-Shanghai ZF-7 UV analyzer. Column chromatography was performed using Silica Gel 60 (300-400 mesh). The reactions were monitored by GC and GC-MS, GC analysis was performed on GC 2014, and GC-MS results were recorded on GC-MS QP2010. The <sup>1</sup>H, <sup>13</sup>C and <sup>19</sup>F NMR spectra were recorded on a Bruker ADVANCE III spectrometer at 400 MHz, 100 MHz and 376 MHz respectively, and chemical shifts were reported in parts per million (ppm). All solvents and reagents were purchased from Tansoole, Meryer, Heowns, Energy Chemical, Alfa Aesar and Aladdin.

## 2. Optimization of Reaction Conditions<sup>a</sup>

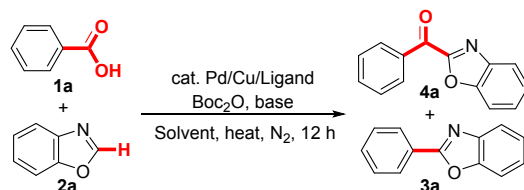

| Entry           | [Pd]                               | [Cu]                 | Ligand              | Anhydride                           | Base                            | Solvent | Total Yield (3a/4a) <sup>b</sup> |
|-----------------|------------------------------------|----------------------|---------------------|-------------------------------------|---------------------------------|---------|----------------------------------|
| 1               | Pd(OAc) <sub>2</sub>               | CuCl <sub>2</sub>    | dppp                | Boc <sub>2</sub> O                  | NaHCO <sub>3</sub>              | Cy      | >99% (25/1)                      |
| 2               | -                                  | CuCl <sub>2</sub>    | dppp                | Boc <sub>2</sub> O                  | NaHCO <sub>3</sub>              | Cy      | trace (-/-)                      |
| 3               | Pd(TFA) <sub>2</sub>               | CuCl <sub>2</sub>    | dppp                | Boc <sub>2</sub> O                  | NaHCO <sub>3</sub>              | Cy      | 94% (23/1)                       |
| 4               | PdCl <sub>2</sub>                  | CuCl <sub>2</sub>    | dppp                | Boc <sub>2</sub> O                  | NaHCO <sub>3</sub>              | Cy      | >99% (16/1)                      |
| 5               | Pd(OAc) <sub>2</sub>               | CuCl <sub>2</sub>    | dppp                | Boc <sub>2</sub> O                  | NaHCO <sub>3</sub>              | Cy      | >99% (12/1)                      |
| 6               | Pd <sub>2</sub> (dba) <sub>3</sub> | CuCl <sub>2</sub>    | dppp                | Boc <sub>2</sub> O                  | NaHCO <sub>3</sub>              | Cy      | >99% (2.5/1)                     |
| 7               | Pd(OAc) <sub>2</sub>               | CuCl <sub>2</sub>    | dppp                | Boc <sub>2</sub> O                  | -                               | Cy      | trace (-/-)                      |
| 8               | Pd(OAc) <sub>2</sub>               | CuCl <sub>2</sub>    | dppp                | Boc <sub>2</sub> O                  | Et <sub>3</sub> N               | Cy      | 90% (29/1)                       |
| 9               | Pd(OAc) <sub>2</sub>               | CuCl <sub>2</sub>    | dppp                | Boc <sub>2</sub> O                  | Na <sub>2</sub> CO <sub>3</sub> | Cy      | 80% (12/1)                       |
| 10              | Pd(OAc) <sub>2</sub>               | CuCl <sub>2</sub>    | dppp                | Boc <sub>2</sub> O                  | KHCO <sub>3</sub>               | Cy      | 74% (7/1)                        |
| 11              | Pd(OAc) <sub>2</sub>               | CuCl <sub>2</sub>    | dppp                | Boc <sub>2</sub> O                  | K <sub>2</sub> CO <sub>3</sub>  | Cy      | 47% (7:1)                        |
| 12              | Pd(OAc) <sub>2</sub>               | CuCl <sub>2</sub>    | dppp                | Boc <sub>2</sub> O                  | Cs <sub>2</sub> CO <sub>3</sub> | Cy      | 11% (5/1)                        |
| 13              | Pd(OAc) <sub>2</sub>               | -                    | dppp                | Boc <sub>2</sub> O                  | NaHCO <sub>3</sub>              | Cy      | trace (-/-)                      |
| 14              | Pd(OAc) <sub>2</sub>               | Cu(OAc) <sub>2</sub> | dppp                | Boc <sub>2</sub> O                  | NaHCO <sub>3</sub>              | Cy      | 83% (3/1)                        |
| 15              | Pd(OAc) <sub>2</sub>               | CuBr <sub>2</sub>    | dppp                | Boc <sub>2</sub> O                  | NaHCO <sub>3</sub>              | Cy      | 58% (28/1)                       |
| 16              | Pd(OAc) <sub>2</sub>               | CuCl                 | dppp                | Boc <sub>2</sub> O                  | NaHCO <sub>3</sub>              | Cy      | 88% (17/1)                       |
| 17              | Pd(OAc) <sub>2</sub>               | CuBr                 | dppp                | Boc <sub>2</sub> O                  | NaHCO <sub>3</sub>              | Cy      | 53% (17/1)                       |
| 18              | Pd(OAc) <sub>2</sub>               | Cu                   | dppp                | Boc <sub>2</sub> O                  | NaHCO <sub>3</sub>              | Cy      | trace (-/-)                      |
| 19              | Pd(OAc) <sub>2</sub>               | CuCl <sub>2</sub>    | -                   | Boc <sub>2</sub> O                  | NaHCO <sub>3</sub>              | Cy      | trace (-/-)                      |
| 20 <sup>c</sup> | Pd(OAc) <sub>2</sub>               | CuCl <sub>2</sub>    | dppp                | Boc <sub>2</sub> O                  | NaHCO <sub>3</sub>              | Cy      | 57% (2/1)                        |
| 21 <sup>d</sup> | Pd(OAc) <sub>2</sub>               | CuCl <sub>2</sub>    | dppp                | Boc <sub>2</sub> O                  | NaHCO <sub>3</sub>              | Cy      | 68% (3/1)                        |
| 22 <sup>e</sup> | Pd(OAc) <sub>2</sub>               | CuCl <sub>2</sub>    | dppp                | Boc <sub>2</sub> O                  | NaHCO <sub>3</sub>              | Cy      | 91% (6/1)                        |
| 23 <sup>f</sup> | Pd(OAc) <sub>2</sub>               | CuCl <sub>2</sub>    | dppp                | Boc <sub>2</sub> O                  | NaHCO <sub>3</sub>              | Cy      | 93% (12/1)                       |
| 24              | Pd(OAc) <sub>2</sub>               | CuCl <sub>2</sub>    | PPh <sub>3</sub>    | Boc <sub>2</sub> O                  | NaHCO <sub>3</sub>              | Cy      | 87% (1/9)                        |
| 25              | Pd(OAc) <sub>2</sub>               | CuCl <sub>2</sub>    | CyPh <sub>2</sub> P | Boc <sub>2</sub> O                  | NaHCO <sub>3</sub>              | Cy      | 92% (1/5.5)                      |
| 26              | Pd(OAc) <sub>2</sub>               | CuCl <sub>2</sub>    | Xantphos            | Boc <sub>2</sub> O                  | NaHCO <sub>3</sub>              | Cy      | 21% (1/2.5)                      |
| 27              | Pd(OAc) <sub>2</sub>               | CuCl <sub>2</sub>    | dppm                | Boc <sub>2</sub> O                  | NaHCO <sub>3</sub>              | Cy      | trace (-/-)                      |
| 28              | Pd(OAc) <sub>2</sub>               | CuCl <sub>2</sub>    | dppe                | Boc <sub>2</sub> O                  | NaHCO <sub>3</sub>              | Cy      | 39% (1/7)                        |
| 29              | Pd(OAc) <sub>2</sub>               | CuCl <sub>2</sub>    | dppb                | Boc <sub>2</sub> O                  | NaHCO <sub>3</sub>              | Cy      | 89% (1.3/1)                      |
| 30              | Pd(OAc) <sub>2</sub>               | CuCl <sub>2</sub>    | dpppe               | Boc <sub>2</sub> O                  | NaHCO <sub>3</sub>              | Cy      | >99% (1/2)                       |
| 31              | Pd(OAc) <sub>2</sub>               | CuCl <sub>2</sub>    | dpph                | Boc <sub>2</sub> O                  | NaHCO <sub>3</sub>              | Cy      | >99% (1/10)                      |
| 32              | Pd(OAc) <sub>2</sub>               | CuCl <sub>2</sub>    | dppf                | Boc <sub>2</sub> O                  | NaHCO <sub>3</sub>              | Cy      | 12% (4/1)                        |
| 33              | Pd(OAc) <sub>2</sub>               | CuCl <sub>2</sub>    | dppp                | Boc <sub>2</sub> O                  | NaHCO <sub>3</sub>              | Toluene | 74% (11/1)                       |
| 34              | Pd(OAc) <sub>2</sub>               | CuCl <sub>2</sub>    | dppp                | Boc <sub>2</sub> O                  | NaHCO <sub>3</sub>              | THF     | 81% (4/1)                        |
| 35              | Pd(OAc) <sub>2</sub>               | CuCl <sub>2</sub>    | dppp                | Boc <sub>2</sub> O                  | NaHCO <sub>3</sub>              | Dioxane | 33% (10/1)                       |
| 36              | Pd(OAc) <sub>2</sub>               | CuCl <sub>2</sub>    | dppp                | Boc <sub>2</sub> O                  | NaHCO <sub>3</sub>              | PhOMe   | 16% (16/1)                       |
| 37              | Pd(OAc) <sub>2</sub>               | CuCl <sub>2</sub>    | dppp                | Boc <sub>2</sub> O                  | NaHCO <sub>3</sub>              | DMF     | trace (-/-)                      |
| 38              | Pd(OAc) <sub>2</sub>               | CuCl <sub>2</sub>    | dppp                | -                                   | NaHCO <sub>3</sub>              | Cy      | N.D. (-/-)                       |
| 39              | Pd(OAc) <sub>2</sub>               | CuCl <sub>2</sub>    | dppp                | Piv <sub>2</sub> O                  | NaHCO <sub>3</sub>              | Cy      | 16% (20/1)                       |
| 40              | Pd(OAc) <sub>2</sub>               | CuCl <sub>2</sub>    | dppp                | Ac <sub>2</sub> O                   | NaHCO <sub>3</sub>              | Cy      | N.D. (-/-)                       |
| 41              | Pd(OAc) <sub>2</sub>               | CuCl <sub>2</sub>    | dppp                | (CF <sub>3</sub> CO) <sub>2</sub> O | NaHCO <sub>3</sub>              | Cy      | trace (-/-)                      |
| 42 <sup>g</sup> | Pd(OAc) <sub>2</sub>               | CuCl <sub>2</sub>    | dppp                | Boc <sub>2</sub> O                  | NaHCO <sub>3</sub>              | Cy      | 96% (9/1)                        |

<sup>a</sup>Reaction conditions: **1a** (0.75 mmol), **2a** (0.5 mmol), Pd catalyst (1 mol%, Pd/P=1:20), Cu salt (10 mol%), Phosphine ligand, Boc<sub>2</sub>O (1.5 equiv), base (1.5 equiv), cyclohexane (Cy, 6 mL), 120 °C, 12 h, N<sub>2</sub> atmosphere. <sup>b</sup>GC yield using tridecane as an internal standard. <sup>c</sup>1 mol% dppp. <sup>d</sup>2 mol% dppp. <sup>e</sup>5 mol% dppp. <sup>f</sup>8 mol% dppp. <sup>g</sup>110 °C.

### 3. General Experimental Procedures

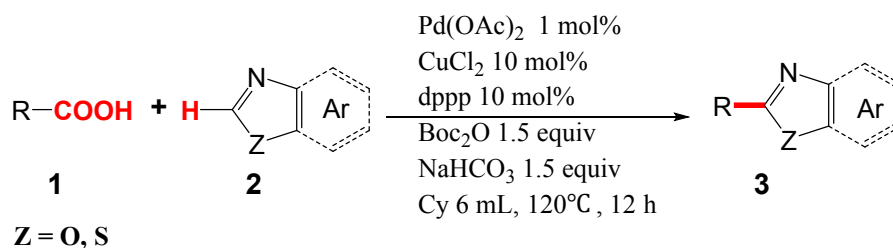

**General procedure I for the Pd/Cu cooperatively catalyzed C-H arylation of azoles with carboxylic acids:** An oven dried 25 mL Schlenk tube was charged with carboxylic acid **1** (0.75 mmol), Pd(OAc)<sub>2</sub> (0.005 mmol, 1 mol %), CuCl<sub>2</sub> (0.05 mmol, 10 mol %), dppp (0.05 mmol, 10 mol %) and NaHCO<sub>3</sub> (0.75 mmol, 1.5 equiv), then azoles **2** (0.5 mmol), Boc<sub>2</sub>O (0.75 mmol, 1.5 equiv) and cyclohexane (6.0 mL) were added under a N<sub>2</sub> atmosphere. The reaction mixture was reacted at 120 °C for 12 h. After completion of the reaction, the reaction mixture was concentrated under vacuo. The desired product was isolated by column chromatography over silica gel (300-400 mesh) using petroleum ether-ethyl acetate-dichloromethane as eluent.

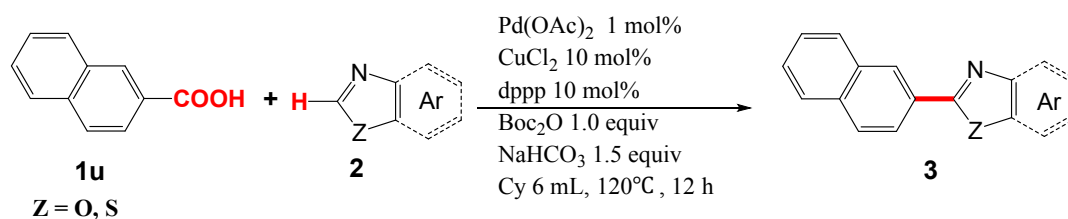

**General procedure II for the Pd/Cu cooperative catalyzed the C-H arylation of azoles with carboxylic acids:** An oven dried 25 mL Schlenk tube was charged with 2-naphthoic acid **1u** (0.5 mmol), Pd(OAc)<sub>2</sub> (0.005 mmol, 1 mol %), CuCl<sub>2</sub> (0.05 mmol, 10 mol %), dppp (0.05 mmol, 10 mol %) and NaHCO<sub>3</sub> (0.75 mmol, 1.5 equiv), then azoles **2** (0.75 mmol), Boc<sub>2</sub>O (0.5 mmol, 1.0 equiv) and cyclohexane (6.0 mL) were added under a N<sub>2</sub> atmosphere. The reaction mixture was reacted at 120 °C for 12 h. After completion of the reaction, the reaction mixture was concentrated under vacuo. The desired product was isolated by column chromatography over silica gel (300-400 mesh) using petroleum ether-ethyl acetate-dichloromethane as eluent.

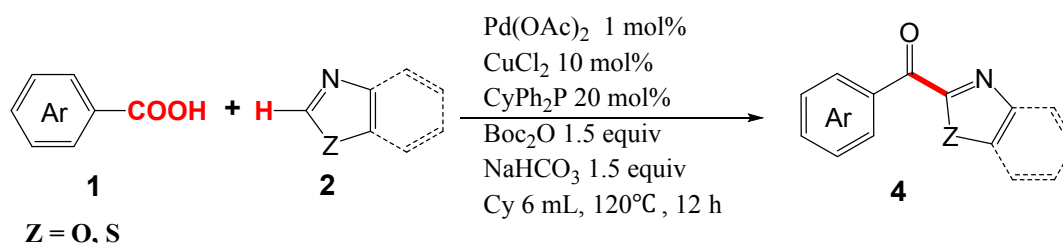

**General procedure III for the Pd/Cu cooperative catalyzed the C-H acylation of azoles with carboxylic acids:** An oven dried 25 mL Schlenk tube was charged with 2-naphthoic acid **1** (0.75 mmol), Pd(OAc)<sub>2</sub> (0.005 mmol, 1 mol %), CuCl<sub>2</sub> (0.05 mmol, 10 mol %), Ph<sub>2</sub>PCy (0.1 mmol, 20 mol %) and NaHCO<sub>3</sub> (0.75 mmol, 1.5 equiv), then azoles **2** (0.5 mmol), Boc<sub>2</sub>O (0.5 mmol, 1.0 equiv) and cyclohexane (6.0 mL) were added under a N<sub>2</sub> atmosphere. The reaction mixture was

reacted at 120 °C for 12 h. After completion of the reaction, the reaction mixture was concentrated under vacuo. The desired product was isolated by column chromatography over silica gel (300-400 mesh) using petroleum ether-ethyl acetate-dichloromethane as eluent.

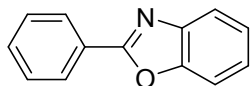

**2-phenylbenzo[d]oxazole (3a):**<sup>1</sup> The title compound was prepared according to the general procedure I and purified by column chromatography on silica gel and eluted with petroleum ether: ethyl acetate = 100:1 (v:v) to afford a white solid in 95% yield (92.7 mg). <sup>1</sup>H NMR (CDCl<sub>3</sub>, 400 MHz) δ 8.20-8.18 (m, 2H), 7.73-7.69 (m, 1H), 7.53-7.49 (m, 1H); 7.47-7.44 (m, 3H), 7.31-7.26 (m, 2H); <sup>13</sup>C NMR (CDCl<sub>3</sub>, 100 MHz) δ 163.0, 150.8, 142.1, 131.5, 128.9, 127.6, 127.2, 125.1, 124.6, 120.0, 110.6. Characterization data matched those previously reported.

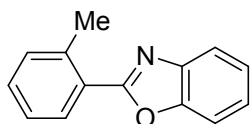

**2-(o-tolyl)benzo[d]oxazole (3b):**<sup>2</sup> The title compound was prepared according to the general procedure I and purified by column chromatography on silica gel and eluted with petroleum ether: ethyl acetate = 50:1 (v:v) to afford a white solid in 76% yield (79.5 mg). <sup>1</sup>H NMR (CDCl<sub>3</sub>, 400 MHz) δ 8.11-8.09 (m, 1H), 7.75-7.71 (m, 1H), 7.54-7.49 (m, 1H), 7.36-7.32 (m, 1H), 7.31-7.25 (m, 4H), 2.74 (s, 3H); <sup>13</sup>C NMR (CDCl<sub>3</sub>, 100 MHz) δ 163.4, 150.3, 142.1, 138.3, 131.8, 130.9, 129.9, 126.2, 126.0, 125.0, 124.3, 120.1, 110.5, 22.2. Characterization data matched those previously reported.

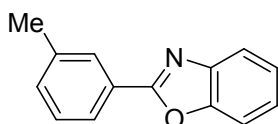

**2-(m-tolyl)benzo[d]oxazole (3c):**<sup>1</sup> The title compound was prepared according to the general procedure I and purified by column chromatography on silica gel and eluted with petroleum ether: ethyl acetate = 100:1 (v:v) to afford a white solid in 70% yield (73.2 mg). <sup>1</sup>H NMR (CDCl<sub>3</sub>, 400 MHz) δ 8.03 (s, 1H), 7.98 (d, *J* = 7.6 Hz, 1H), 7.72-7.68 (m, 1H), 7.54-7.49 (m, 1H), 7.34 (t, *J* = 7.6 Hz, 1H), 7.30-7.26 (m, 3H), 2.39 (s, 3H); <sup>13</sup>C NMR (CDCl<sub>3</sub>, 100 MHz) δ 163.3, 150.7, 142.1, 138.7, 132.4, 128.8, 128.2, 127.0, 125.0, 124.8, 124.5, 120.0, 110.6, 21.3. Characterization data matched those previously reported.

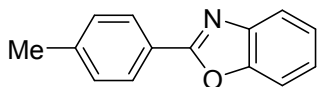

**2-(p-tolyl)benzo[d]oxazole (3d):**<sup>3</sup> The title compound was prepared according to the general procedure I and purified by column chromatography on silica gel and eluted with petroleum ether: ethyl acetate = 100:1 (v:v) to afford a white solid in 82% yield (85.8 mg). <sup>1</sup>H NMR (CDCl<sub>3</sub>, 400

MHz)  $\delta$  8.08 (d,  $J = 8.4$  Hz, 2H), 7.72-7.68 (m, 1H), 7.53-7.49 (m, 1H), 7.29-7.26 (m, 4H), 2.38 (s, 3H);  $^{13}\text{C}$  NMR ( $\text{CDCl}_3$ , 100 MHz)  $\delta$  163.3, 150.7, 142.1, 129.7, 127.6, 124.9, 124.5, 124.4, 119.8, 110.5, 21.7. Characterization data matched those previously reported.

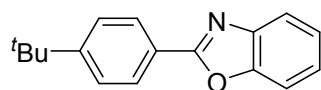

**2-(4-tert-butylphenyl)benzo[d]oxazole (3e):**<sup>5</sup> The title compound was prepared according to the general procedure I and purified by column chromatography on silica gel and eluted with petroleum ether: ethyl acetate = 50:1 (v:v) to afford a white solid in 82% yield (103.0 mg).  $^1\text{H}$  NMR ( $\text{CDCl}_3$ , 400 MHz)  $\delta$  8.10 (d,  $J = 8.4$  Hz, 2H), 7.69-7.67 (m, 1H), 7.49-7.44 (m, 3H), 7.27-7.21 (m, 2H), 1.28 (s, 9H);  $^{13}\text{C}$  NMR ( $\text{CDCl}_3$ , 100 MHz)  $\delta$  163.2, 155.1, 150.7, 142.2, 127.4, 125.9, 124.8, 124.4, 124.3, 119.8, 110.5, 35.0, 31.1. Characterization data matched those previously reported.

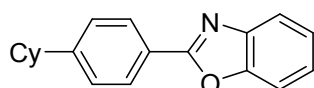

**2-(4-cyclohexylphenyl)benzo[d]oxazole (3f):** The title compound was prepared according to the general procedure I and purified by column chromatography on silica gel and eluted with petroleum ether: ethyl acetate = 20:1 (v:v) to afford a white solid in 70% yield (97.1 mg).  $^1\text{H}$  NMR ( $\text{CDCl}_3$ , 400 MHz)  $\delta$  8.18-8.15 (m, 2H), 7.78-7.74 (m, 1H), 7.57-7.53 (m, 1H), 7.35-7.30 (m, 4H), 2.59-2.53 (m, 1H), 1.92-1.84 (m, 4H), 1.78-1.74 (m, 1H), 1.50-1.35 (m, 4H), 1.31-1.20 (m, 1H);  $^{13}\text{C}$  NMR ( $\text{CDCl}_3$ , 100 MHz)  $\delta$  163.2, 152.0, 150.6, 142.1, 127.6, 127.4, 124.8, 124.6, 124.4, 119.8, 110.4, 44.6, 34.1, 26.7, 26.0. CAS: 305360-81-0.

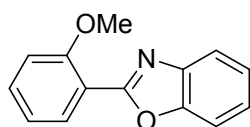

**2-(2-methoxyphenyl)benzo[d]oxazole (3g):**<sup>6</sup> The title compound was prepared according to the general procedure I and purified by column chromatography on silica gel and eluted with petroleum ether: ethyl acetate = 5:1 (v:v) to afford a white solid in 72% yield (91.2 mg).  $^1\text{H}$  NMR ( $\text{CDCl}_3$ , 400 MHz)  $\delta$  8.13 (dd,  $J_1 = 8.0$  Hz,  $J_2 = 1.6$  Hz, 1H), 7.85-7.80 (m, 1H), 7.60-7.56 (m, 1H), 7.50-7.46 (m, 1H), 7.35-7.31 (m, 2H), 7.10-7.05 (m, 2H), 4.00 (s, 3H);  $^{13}\text{C}$  NMR ( $\text{CDCl}_3$ , 100 MHz)  $\delta$  161.5, 158.4, 150.2, 142.1, 132.7, 131.2, 124.9, 124.2, 120.6, 120.1, 116.1, 112.0, 110.4, 56.1. Characterization data matched those previously reported.

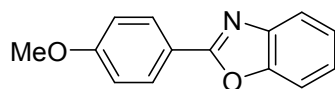

**2-(4-methoxyphenyl)benzo[d]oxazole (3h):**<sup>1</sup> The title compound was prepared according to the general procedure I and purified by column chromatography on silica gel and eluted with petroleum ether: ethyl acetate = 10:1 (v:v) to afford a white solid in 60% yield (75.9 mg).  $^1\text{H}$

NMR (CDCl<sub>3</sub>, 400 MHz)  $\delta$  8.15-8.11 (m, 2H), 7.69-7.65 (m, 1H), 7.49-7.46 (m, 1H), 7.29-7.22 (m, 2H), 6.98-6.94 (m, 2H), 3.82 (s, 3H); <sup>13</sup>C NMR (CDCl<sub>3</sub>, 100 MHz)  $\delta$  163.2, 162.3, 150.6, 142.2, 129.4, 124.6, 124.4, 119.7, 119.6, 114.3, 110.4, 55.4. Characterization data matched those previously reported.

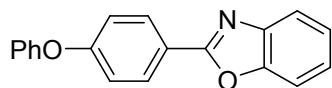

**2-(4-phenoxyphenyl)benzo[d]oxazole (3i):** The title compound was prepared according to the general procedure I and purified by column chromatography on silica gel and eluted with petroleum ether: ethyl acetate = 20:1 (v:v) to afford a white solid in 78% yield (112.1 mg). <sup>1</sup>H NMR (CDCl<sub>3</sub>, 400 MHz)  $\delta$  8.13-8.09 (m, 2H), 7.67-7.63 (m, 1H), 7.47-7.43 (m, 1H), 7.32-7.27 (m, 2H), 7.26-7.19 (m, 2H), 7.11-7.07 (m, 1H), 7.01-6.98 (m, 4H); <sup>13</sup>C NMR (CDCl<sub>3</sub>, 100 MHz)  $\delta$  162.7, 160.6, 155.7, 150.6, 142.1, 130.0, 129.4, 124.8, 124.5, 124.3, 121.6, 119.9, 119.7, 118.1, 110.4. CAS: 142629-40-1.

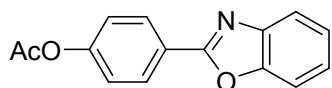

**2-(4-acetoxyphenyl)benzo[d]oxazole (3j):**<sup>10</sup> The title compound was prepared according to the general procedure I and purified by column chromatography on silica gel and eluted with petroleum ether: ethyl acetate = 5:1 (v:v) to afford a white solid in 80% yield (101.3 mg). <sup>1</sup>H NMR (CDCl<sub>3</sub>, 400 MHz)  $\delta$  8.27 (d, *J* = 8.4 Hz, 2H), 7.78-7.74 (m, 1H), 7.58-7.54 (m, 1H), 7.36-7.32 (m, 2H), 7.26 (d, *J* = 8.8 Hz, 2H), 2.33 (s, 3H); <sup>13</sup>C NMR (CDCl<sub>3</sub>, 100 MHz)  $\delta$  168.9, 162.2, 153.1, 150.7, 142.0, 128.9, 125.1, 124.7, 124.6, 122.2, 119.9, 110.5, 21.1. Characterization data matched those previously reported.

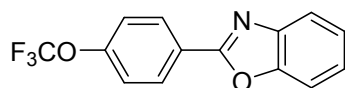

**2-(4-trifluoromethoxyphenyl)benzo[d]oxazole (3k):** The title compound was prepared according to the general procedure I and purified by column chromatography on silica gel and eluted with petroleum ether: ethyl acetate = 50:1 (v:v) to afford a white solid in 90% yield (125.6 mg). <sup>1</sup>H NMR (CDCl<sub>3</sub>, 400 MHz)  $\delta$  8.21-8.17 (m, 2H), 7.70-7.66 (m, 1H), 7.51-7.46 (m, 1H), 7.29-7.25 (m, 4H); <sup>13</sup>C NMR (CDCl<sub>3</sub>, 100 MHz)  $\delta$  161.6, 151.4(d, *J*<sub>C-F</sub> = 1.8 Hz), 150.7, 141.9, 129.2, 125.6, 125.3, 124.7, 121.0, 120.3 (q, *J*<sub>C-F</sub> = 256.8 Hz), 120.1, 110.6. <sup>19</sup>F NMR (CDCl<sub>3</sub>, 376 MHz)  $\delta$  57.7. HRMS(APCI): calcd for C<sub>14</sub>H<sub>8</sub>NO<sub>2</sub>F<sub>3</sub> [M+H]<sup>+</sup> *m/z* 280.0580; found 280.2579. m.p. 121.5-122.1 °C.

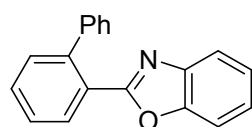

**2-([1,1'-biphenyl]-2-yl)benzo[d]oxazole (3l):**<sup>8</sup> The title compound was prepared according to the



general procedure I and purified by column chromatography on silica gel and eluted with petroleum ether: ethyl acetate = 20:1 (v:v) to afford a colorless liquid in 84% yield (114.0 mg). <sup>1</sup>H NMR (CDCl<sub>3</sub>, 400 MHz) δ 8.10 (d, *J* = 7.6 Hz, 1H), 7.71 (d, *J* = 7.6 Hz, 1H), 7.57-7.53 (m, 1H), 7.48 (t, *J* = 7.2 Hz, 2H), 7.31-7.23 (m, 8H); <sup>13</sup>C NMR (CDCl<sub>3</sub>, 100 MHz) δ 163.7, 150.6, 142.3, 141.6, 140.9, 131.0, 130.9, 128.7, 128.0, 127.4, 127.2, 126.2, 124.8, 124.2, 120.0, 110.4. Characterization data matched those previously reported.

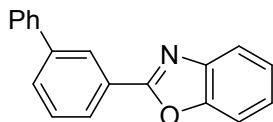

**2-([1,1'-biphenyl]-3-yl)benzo[d]oxazole (3m):**<sup>9</sup> The title compound was prepared according to the general procedure I and purified by column chromatography on silica gel and eluted with petroleum ether: ethyl acetate = 20:1 (v:v) to afford a white solid in 81% yield (109.9 mg). <sup>1</sup>H NMR (CDCl<sub>3</sub>, 400 MHz) δ 8.41 (s, 1H), 8.13 (dt, *J*<sub>1</sub> = 8.0 Hz, *J*<sub>2</sub> = 1.6 Hz, 1H), 7.72-7.69 (m, 1H), 7.67-7.64 (m, 1H), 7.60-7.58 (m, 2H), 7.50-7.46 (m, 2H), 7.40-7.36 (m, 2H), 7.32-7.25 (m, 3H); <sup>13</sup>C NMR (CDCl<sub>3</sub>, 100 MHz) δ 162.9, 150.7, 142.1, 141.9, 140.0, 130.2, 129.4, 128.9, 127.8, 127.6, 127.2, 126.3, 126.2, 125.2, 124.6, 120.0, 110.6. Characterization data matched those previously reported.

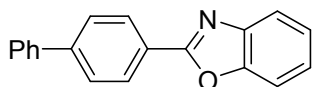

**2-([1,1'-biphenyl]-4-yl)benzo[d]oxazole (3n):**<sup>7</sup> The title compound was prepared according to the general procedure I and purified by column chromatography on silica gel and eluted with petroleum ether: ethyl acetate = 20:1 (v:v) to afford a white solid in 90% yield (122.1 mg). <sup>1</sup>H NMR (CDCl<sub>3</sub>, 400 MHz) δ 8.29 (d, *J* = 8.4 Hz, 2H), 7.78-7.76 (m, 1H), 7.71 (d, *J* = 8.0 Hz, 2H), 7.62 (d, *J* = 7.2 Hz, 2H), 7.56-7.54 (m, 1H), 7.44 (t, *J* = 7.6 Hz, 2H), 7.38-7.30 (m, 3H); <sup>13</sup>C NMR (CDCl<sub>3</sub>, 100 MHz) δ 162.8, 150.7, 144.1, 142.1, 139.9, 128.9, 128.0, 127.5, 127.1, 125.9, 125.0, 124.5, 119.9, 110.5. Characterization data matched those previously reported.

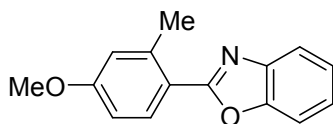

**2-(4-methoxy-2-methylphenyl)benzo[d]oxazole (3o):**<sup>19</sup> The title compound was prepared according to the general procedure I and purified by column chromatography on silica gel and eluted with petroleum ether: ethyl acetate = 20:1 (v:v) to afford a white solid in 52% yield (62.2 mg). <sup>1</sup>H NMR (CDCl<sub>3</sub>, 400 MHz) δ 8.13-8.11 (m, 1H), 7.77-7.73 (m, 1H), 7.55-7.50 (m, 1H), 7.33-7.27 (m, 2H), 6.85-6.82 (m, 2H), 3.82 (s, 3H), 2.79 (s, 3H); <sup>13</sup>C NMR (CDCl<sub>3</sub>, 100 MHz) δ 163.4, 161.4, 150.1, 142.2, 140.9, 131.6, 124.4, 124.1, 119.7, 118.8, 116.9, 111.4, 110.2, 55.2, 22.5. Characterization data matched those previously reported.

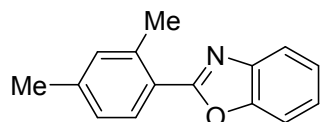

**2-(2,4-dimethylphenyl)benzo[d]oxazole (3p):**<sup>20</sup> The title compound was prepared according to the general procedure I and purified by column chromatography on silica gel and eluted with petroleum ether: ethyl acetate = 20:1 (v:v) to afford a white solid in 56% yield (62.5 mg). <sup>1</sup>H NMR (CDCl<sub>3</sub>, 400 MHz) δ 8.12 (d, *J* = 8.4 Hz, 1H), 7.80-7.75 (m, 1H), 7.58-7.53 (m, 1H), 7.35-7.30 (m, 2H), 7.14-7.12 (m, 2H), 2.77 (s, 3H), 2.37 (s, 3H); <sup>13</sup>C NMR (CDCl<sub>3</sub>, 100 MHz) δ 163.6, 150.2, 142.2, 141.2, 138.7, 132.5, 129.9, 126.8, 124.7, 124.2, 123.4, 119.9, 110.3, 22.1, 21.3. Characterization data matched those previously reported.

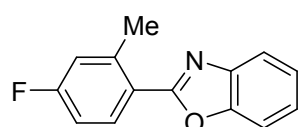

**2-(4-fluoro-2-methylphenyl)benzo[d]oxazole (3q):** The title compound was prepared according to the general procedure I and purified by column chromatography on silica gel and eluted with petroleum ether: ethyl acetate = 20:1 (v:v) to afford a white solid in 75% yield (85.2 mg). <sup>1</sup>H NMR (CDCl<sub>3</sub>, 400 MHz) δ 8.05-8.01 (m, 1H), 7.69-7.64 (m, 1H), 7.25-7.20 (m, 2H), 6.92-6.87 (m, 2H), 2.68 (s, 3H); <sup>13</sup>C NMR (CDCl<sub>3</sub>, 100 MHz) δ 165.1, 162.5 (d, *J*<sub>C-F</sub> = 18.8 Hz), 150.10, 142.0 (d, *J*<sub>C-F</sub> = 5.7 Hz), 141.8, 132.0 (d, *J*<sub>C-F</sub> = 9.1 Hz), 125.0, 124.4, 122.4 (d, *J*<sub>C-F</sub> = 2.9 Hz), 120.0, 118.4 (d, *J*<sub>C-F</sub> = 21.3 Hz), 113.2 (d, *J*<sub>C-F</sub> = 21.4 Hz), 110.3, 22.2 (d, *J*<sub>C-F</sub> = 1.1 Hz); <sup>19</sup>F NMR (CDCl<sub>3</sub>, 376 MHz) δ 109.2. CAS: 2417741-78-5.

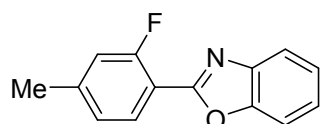

**2-(2-fluoro-4-methylphenyl)benzo[d]oxazole (3r):** The title compound was prepared according to the general procedure I and purified by column chromatography on silica gel and eluted with petroleum ether: ethyl acetate = 20:1 (v:v) to afford a white solid in 58% yield (65.9 mg). <sup>1</sup>H NMR (CDCl<sub>3</sub>, 400 MHz) δ 8.05-8.01 (m, 1H), 7.69-7.64 (m, 1H), 7.25-7.20 (m, 2H), 6.92-6.87 (m, 2H), 2.68 (s, 3H); <sup>13</sup>C NMR (CDCl<sub>3</sub>, 100 MHz) δ 160.6 (d, *J*<sub>C-F</sub> = 256.9 Hz), 159.6 (d, *J*<sub>C-F</sub> = 5.6 Hz), 150.2, 144.4 (d, *J*<sub>C-F</sub> = 8.4 Hz), 141.7, 130.0 (d, *J*<sub>C-F</sub> = 2.0 Hz), 125.2 (d, *J*<sub>C-F</sub> = 3.1 Hz), 125.1, 124.5, 120.1, 117.4 (d, *J*<sub>C-F</sub> = 21.2 Hz), 112.5 (d, *J*<sub>C-F</sub> = 10.5 Hz), 110.5, 21.4 (d, *J*<sub>C-F</sub> = 1.0 Hz); <sup>19</sup>F NMR (CDCl<sub>3</sub>, 376 MHz) δ 111.0. CAS: 37135-23-2.

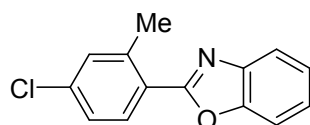

**2-(4-chloro-2-methylphenyl)benzo[d]oxazole (3s):** The title compound was prepared according to the general procedure I and purified by column chromatography on silica gel and eluted with

petroleum ether: ethyl acetate = 20:1 (v:v) to afford a white solid in 76% yield (92.6 mg). <sup>1</sup>H NMR (CDCl<sub>3</sub>, 400 MHz) δ 8.07 (d, *J* = 8.4 Hz, 1H), 7.79-7.75 (m, 1H), 7.56-7.52 (m, 1H), 7.35-7.31 (m, 2H), 7.30-7.26 (m, 2H), 2.76 (s, 3H); <sup>13</sup>C NMR (CDCl<sub>3</sub>, 100 MHz) δ 162.3, 150.1, 142.0, 140.6, 136.7, 131.6, 131.0, 126.2, 125.2, 124.6, 124.4, 120.1, 110.4, 22.10. HRMS(ESI): calcd for C<sub>14</sub>H<sub>10</sub>NOCl [M+H]<sup>+</sup> m/z 244.0524; found 244.0523. m.p. 113.9-115.2 °C.

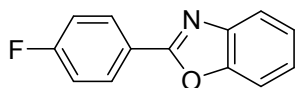

**2-(4-fluorophenyl)benzo[d]oxazole (3t):**<sup>2</sup> The title compound was prepared according to the general procedure I and purified by column chromatography on silica gel and eluted with petroleum ether: ethyl acetate = 10:1 (v:v) to afford a white solid in 88% yield (93.8 mg). <sup>1</sup>H NMR (CDCl<sub>3</sub>, 400 MHz) δ 8.22-8.17 (m, 2H), 7.72-7.68 (m, 1H), 7.53-7.49 (m, 1H), 7.31-7.27 (m, 2H), 7.17-7.13 (m, 2H); <sup>13</sup>C NMR (CDCl<sub>3</sub>, 100 MHz) δ 166.0, 163.5, 162.1, 150.7, 141.9, 129.8 (d, *J*<sub>C-F</sub> = 8.8 Hz), 124.9 (d, *J*<sub>C-F</sub> = 48.1 Hz), 123.4 (d, *J*<sub>C-F</sub> = 3.2 Hz), 119.9, 116.2 (d, *J*<sub>C-F</sub> = 22.1 Hz), 110.6. <sup>19</sup>F NMR (CDCl<sub>3</sub>, 376 MHz) δ 107.5. Characterization data matched those previously reported.

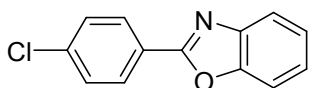

**2-(4-chlorophenyl)benzo[d]oxazole (3u):**<sup>3</sup> The title compound was prepared according to the general procedure I and purified by column chromatography on silica gel and eluted with petroleum ether: ethyl acetate = 20:1 (v:v) to afford a white solid in 82% yield (94.2 mg). <sup>1</sup>H NMR (CDCl<sub>3</sub>, 400 MHz) δ 8.13-8.09 (m, 2H), 7.71-7.67 (m, 1H), 7.52-7.48 (m, 1H), 7.44-7.41 (m, 2H), 7.31-7.26 (m, 2H); <sup>13</sup>C NMR (CDCl<sub>3</sub>, 100 MHz) δ 162.0, 150.7, 144.0, 137.8, 129.3, 128.8, 125.6, 125.3, 124.7, 120.0, 110.6. Characterization data matched those previously reported.

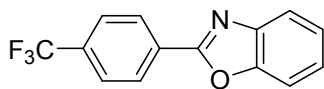

**2-[4-(trifluoromethyl)phenyl]benzo[d]oxazole (3v):**<sup>1</sup> The title compound was prepared according to the general procedure I and purified by column chromatography on silica gel and eluted with petroleum ether: ethyl acetate = 10:1 (v:v) to afford a white solid in 81% yield (106.6 mg). <sup>1</sup>H NMR (CDCl<sub>3</sub>, 400 MHz) δ 8.28 (d, *J* = 8.0 Hz, 2H), 7.74-7.69 (m, 3H), 7.55-7.51 (m, 1H), 7.34-7.29 (m, 2H); <sup>13</sup>C NMR (CDCl<sub>3</sub>, 100 MHz) δ 161.4, 150.8, 141.8, 132.9 (q, *J*<sub>C-F</sub> = 32.5 Hz), 130.3, 127.8, 125.9 (q, *J*<sub>C-F</sub> = 3.7 Hz), 125.8, 124.9, 122.3 (q, *J*<sub>C-F</sub> = 270.8 Hz), 120.3, 110.8. <sup>19</sup>F NMR (CDCl<sub>3</sub>, 376 MHz) δ 63.0. Characterization data matched those previously reported.

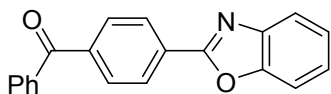

**2-[4-benzoylphenyl]benzo[d]oxazole (3w):**<sup>11</sup> The title compound was prepared according to the

general procedure I (130 °C) and purified by column chromatography on silica gel and eluted with petroleum ether: ethyl acetate = 20:1 (v:v) to afford a white solid in 60% yield (89.8 mg). <sup>1</sup>H NMR (CDCl<sub>3</sub>, 400 MHz) δ 8.24 (d, *J* = 8.8 Hz, 2H), 7.82 (d, *J* = 8.4 Hz, 2H), 7.73-7.67 (m, 3H), 7.52-7.46 (m, 2H), 7.39 (t, *J* = 7.6 Hz, 2H), 7.29-7.24 (m, 2H); <sup>13</sup>C NMR (CDCl<sub>3</sub>, 100 MHz) δ 195.8, 161.9, 150.8, 142.0, 139.7, 137.1, 132.8, 130.4, 130.4, 130.0, 128.4, 127.4, 125.7, 124.8, 120.3, 110.7. Characterization data matched those previously reported.

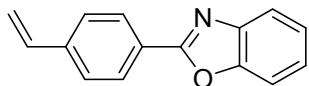

**2-(4-vinylphenyl)benzo[d]oxazole (3x):**<sup>12</sup> The title compound was prepared according to the general procedure I and purified by column chromatography on silica gel and eluted with petroleum ether: ethyl acetate = 10:1 (v:v) to afford a white solid in 72% yield (79.7 mg). <sup>1</sup>H NMR (CDCl<sub>3</sub>, 400 MHz) δ 8.14-8.11 (m, 2H), 7.70-7.66 (m, 1H), 7.50-7.44 (m, 3H), 7.28-7.23 (m, 2H), 6.68 (dd, *J*<sub>1</sub> = 17.6 Hz, *J*<sub>2</sub> = 11.2 Hz, 1H), 5.79 (dd, *J*<sub>1</sub> = 17.6 Hz, *J*<sub>2</sub> = 0.8 Hz, 1H) 5.29 (dd, *J*<sub>1</sub> = 11.2 Hz, *J*<sub>2</sub> = 0.8 Hz, 1H); <sup>13</sup>C NMR (CDCl<sub>3</sub>, 100 MHz) δ 162.8, 150.7, 142.1, 140.6, 136.0, 127.8, 126.6, 126.2, 125.1, 124.6, 119.9, 116.0, 110.5. Characterization data matched those previously reported.

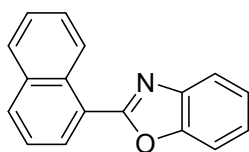

**2-(naphthalen-1-yl)benzo[d]oxazole (3y):**<sup>1</sup> The title compound was prepared according to the general procedure I and purified by column chromatography on silica gel and eluted with petroleum ether: ethyl acetate = 20:1 (v:v) to afford a white solid in 89% yield (112.5 mg). <sup>1</sup>H NMR (CDCl<sub>3</sub>, 400 MHz) δ 9.46 (d, *J* = 8.8 Hz, 1H), 8.42 (dd, *J*<sub>1</sub> = 7.2 Hz, *J*<sub>2</sub> = 0.8 Hz, 1H), 8.02 (d, *J* = 8.0 Hz, 1H), 7.92 (d, *J* = 8.4 Hz, 1H), 7.89-7.86 (m, 1H), 7.72-7.68 (m, 1H), 7.64-7.57 (m, 3H), 7.41-7.37 (m, 2H); <sup>13</sup>C NMR (CDCl<sub>3</sub>, 100 MHz) δ 162.8, 150.1, 142.3, 133.9, 132.3, 130.7, 129.3, 128.6, 127.9, 126.4, 126.3, 125.2, 124.9, 124.5, 123.6, 120.2, 110.5. Characterization data matched those previously reported.

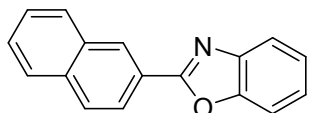

**2-(naphthalen-2-yl)benzo[d]oxazole (3z):**<sup>1</sup> The title compound was prepared according to the general procedure I and purified by column chromatography on silica gel and eluted with petroleum ether: ethyl acetate = 20:1 (v:v) to afford a white solid in 90% yield (113.8 mg). <sup>1</sup>H NMR (CDCl<sub>3</sub>, 400 MHz) δ 8.70 (s, 1H), 8.24 (dd, *J*<sub>1</sub> = 8.4 Hz, *J*<sub>2</sub> = 1.6 Hz, 1H), 7.92-7.88 (m, 2H), 7.83-7.80 (m, 1H), 7.76-7.71 (m, 1H), 7.56-7.53 (m, 1H), 7.50-7.46 (m, 2H), 7.32-7.27 (m, 2H); <sup>13</sup>C NMR (CDCl<sub>3</sub>, 100 MHz) δ 163.2, 150.8, 142.2, 134.7, 133.0, 128.9, 128.8, 128.1, 127.9, 127.8, 126.9, 125.2, 124.6, 124.4, 123.9, 120.0, 110.6. Characterization data matched those previously reported.

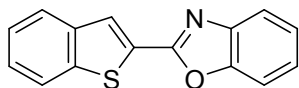

**2-(benzo[b]thiophen-2-yl)benzo[d]oxazole (3aa):**<sup>13</sup> The title compound was prepared according to the general procedure I and purified by column chromatography on silica gel and eluted with petroleum ether: ethyl acetate = 10:1 (v:v) to afford a white solid in 66% yield (82.9 mg). <sup>1</sup>H NMR (CDCl<sub>3</sub>, 400 MHz) δ 8.08 (s, 1H), 7.85-7.82 (m, 2H), 7.73-7.69 (m, 1H), 7.54-7.50 (m, 1H), 7.38-7.35 (m, 2H), 7.32-7.29 (m, 2H); <sup>13</sup>C NMR (CDCl<sub>3</sub>, 100 MHz) δ 159.0, 150.7, 142.0, 141.2, 139.4, 129.3, 126.8, 126.4, 125.5, 125.1, 124.9, 124.9, 122.6, 120.1, 110.5. Characterization data matched those previously reported.

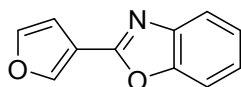

**2-(furan-3-yl)benzo[d]oxazole (3ab):**<sup>4</sup> The title compound was prepared according to the general procedure I and purified by column chromatography on silica gel and eluted with petroleum ether: ethyl acetate = 10:1 (v:v) to afford a white solid in 60% yield (55.6 mg). <sup>1</sup>H NMR (CDCl<sub>3</sub>, 400 MHz) δ 8.22 (s, 1H), 7.75-7.70 (m, 1H), 7.55-7.52 (m, 2H), 7.36-7.32 (m, 2H), 7.03 (d, *J* = 1.6 Hz, 1H); <sup>13</sup>C NMR (CDCl<sub>3</sub>, 100 MHz) δ 158.3, 150.18, 144.3, 144.3, 141.7, 124.9, 124.5, 119.6, 115.4, 110.3, 108.9. Characterization data matched those previously reported.

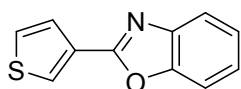

**2-(thiophen-3-yl)benzo[d]oxazole (3ac):**<sup>4</sup> The title compound was prepared according to the general procedure I and purified by column chromatography on silica gel and eluted with petroleum ether: ethyl acetate = 20:1 (v:v) to afford a light yellow solid in 75% yield (75.5 mg). <sup>1</sup>H NMR (CDCl<sub>3</sub>, 400 MHz) δ 8.10 (dd, *J*<sub>1</sub> = 2.8 Hz, *J*<sub>2</sub> = 1.2 Hz, 1H), 7.70 (dd, *J*<sub>1</sub> = 5.2 Hz, *J*<sub>2</sub> = 1.2 Hz, 1H), 7.67-7.65 (m, 1H), 7.47-7.44 (m, 1H), 7.35 (dd, *J*<sub>1</sub> = 5.2 Hz, *J*<sub>2</sub> = 3.2 Hz, 1H), 7.26-7.23 (m, 2H); <sup>13</sup>C NMR (CDCl<sub>3</sub>, 100 MHz) δ 159.6, 150.3, 141.8, 129.2, 128.0, 126.9, 126.6, 125.0, 124.5, 119.8, 110.4. Characterization data matched those previously reported.

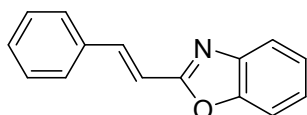

**(E)-2-styrylbenzo[d]oxazole (3ad):**<sup>14</sup> The title compound was prepared according to the general procedure I (4 mol % Pd(OAc)<sub>2</sub>, 130 °C) and purified by column chromatography on silica gel and eluted with petroleum ether: ethyl acetate = 10:1 (v:v) to afford a white solid in 58% yield (64.2 mg). <sup>1</sup>H NMR (CDCl<sub>3</sub>, 400 MHz) δ 7.69 (d, *J* = 16.4 Hz, 1H), 7.64-7.61 (m, 1H), 7.51-7.48 (m, 2H), 7.45-7.40 (m, 1H), 7.34-7.22 (m, 5H), 6.98 (d, *J* = 16.4 Hz, 1H); <sup>13</sup>C NMR (CDCl<sub>3</sub>, 100 MHz) δ 162.7, 150.3, 142.1, 139.4, 135.1, 129.7, 128.9, 127.5, 125.2, 124.5, 119.8, 113.8, 110.3. Characterization data matched those previously reported.

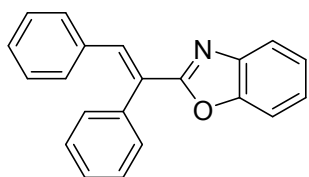

**(E)-2-(1,2-diphenylvinyl)benzo[d]oxazole (3ae):**<sup>15</sup> The title compound was prepared according to the general procedure I and purified by column chromatography on silica gel and eluted with petroleum ether: ethyl acetate = 10:1 (v:v) to afford a white solid in 84% yield (124.9 mg). <sup>1</sup>H NMR (CDCl<sub>3</sub>, 400 MHz) δ 7.95 (s, 1H), 7.72-7.69 (m, 1H), 7.51-7.48 (m, 1H), 7.46-7.42 (m, 3H), 7.39-7.37 (m, 2H), 7.31-7.25 (m, 2H), 7.18-7.13 (m, 3H), 7.10-7.08 (m, 2H); <sup>13</sup>C NMR (CDCl<sub>3</sub>, 100 MHz) δ 164.6, 150.5, 142.2, 136.2, 135.6, 135.0, 130.3, 129.9, 129.1, 129.0, 128.6, 128.4, 128.2, 125.1, 124.3, 120.2, 110.3. Characterization data matched those previously reported.

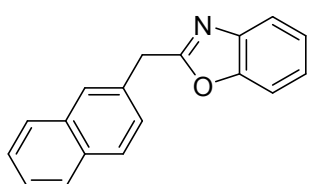

**2-(naphthalen-2-ylmethyl)benzo[d]oxazole (3af):**<sup>24</sup> The title compound was prepared according to the general procedure I (dpph, 130 °C) and purified by column chromatography on silica gel and eluted with petroleum ether: ethyl acetate = 10:1 (v:v) to afford a light yellow solid in 35% yield (45.4 mg). <sup>1</sup>H NMR (CDCl<sub>3</sub>, 400 MHz) δ 7.82-7.79 (m, 4H), 7.72-7.68 (m, 1H), 7.50-7.43 (m, 4H), 7.31-7.25 (m, 2H), 4.42 (s, 2H); <sup>13</sup>C NMR (101 MHz, CDCl<sub>3</sub>): δ 165.1, 151.1, 141.3, 133.5, 132.5, 132.2, 128.5, 127.7, 127.7, 127.6, 126.9, 126.2, 125.9, 124.7, 124.2, 119.8, 110.4, 35.4. Characterization data matched those previously reported.

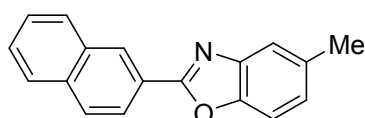

**5-methyl-2-(naphthalen-2-yl)benzo[d]oxazole (3ag):**<sup>11</sup> The title compound was prepared according to the general procedure II and purified by column chromatography on silica gel and eluted with petroleum ether: ethyl acetate = 10:1 (v:v) to afford a white solid in 69% yield (89.5 mg). <sup>1</sup>H NMR (CDCl<sub>3</sub>, 400 MHz) δ 8.67 (s, 1H), 8.22 (dd,  $J_1 = 8.8$  Hz,  $J_2 = 1.6$  Hz, 1H), 7.91-7.87 (m, 2H), 7.83-7.78 (m, 1H), 7.59 (d,  $J = 8.0$  Hz, 1H), 7.51-7.45 (m, 2H), 7.33 (s, 1H), 7.10 (dd,  $J_1 = 8.4$  Hz,  $J_2 = 1.2$  Hz, 1H), 2.44 (s, 3H); <sup>13</sup>C NMR (CDCl<sub>3</sub>, 100 MHz) δ 162.7, 151.1, 140.0, 135.7, 134.6, 132.98, 128.9, 128.7, 127.9, 127.8, 127.7, 126.8, 125.9, 124.6, 123.9, 119.3, 110.7, 21.8. Characterization data matched those previously reported.

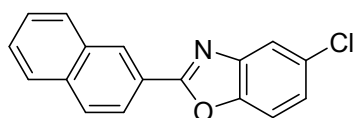

**5-chloro-2-(naphthalen-2-yl)benzo[d]oxazole (3ah):** The title compound was prepared according to the general procedure II and purified by column chromatography on silica gel and eluted with petroleum ether: ethyl acetate = 10:1 (v:v) to afford a white solid in 85% yield (118.9

mg).  $^1\text{H}$  NMR ( $\text{CDCl}_3$ , 400 MHz)  $\delta$  8.60 (s, 1H), 8.13 (dd,  $J_1 = 8.8$  Hz,  $J_2 = 1.6$  Hz, 1H), 7.86-7.82 (m, 2H), 7.79-7.72 (m, 1H), 7.64 (s, 1H), 7.49-7.42 (m, 2H), 7.38 (d,  $J = 8.4$  Hz, 1H), 7.20 (dd,  $J_1 = 8.4$  Hz,  $J_2 = 4.0$  Hz, 1H);  $^{13}\text{C}$  NMR ( $\text{CDCl}_3$ , 100 MHz)  $\delta$  164.4, 149.3, 143.3, 134.8, 132.8, 130.0, 128.9, 128.8, 128.4, 128.0, 127.9, 126.9, 125.3, 123.8, 119.9, 111.2. Characterization data matched those previously reported. CAS: 95888-09-8.

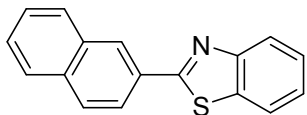

**2-(naphthalen-2-yl)benzo[d]thiazole (3ai):**<sup>1</sup> The title compound was prepared according to the general procedure II and purified by column chromatography on silica gel and eluted with petroleum ether: ethyl acetate = 10:1 (v:v) to afford a white solid in 70% yield (91.5 mg).  $^1\text{H}$  NMR ( $\text{CDCl}_3$ , 400 MHz)  $\delta$  8.53 (s, 1H), 8.18 (dd,  $J_1 = 8.4$  Hz,  $J_2 = 1.6$  Hz, 1H), 8.10 (d,  $J = 8.0$  Hz, 1H), 7.94-7.88 (m, 3H), 7.84 (t,  $J = 3.4$  Hz, 1H), 7.53-7.47 (m, 3H), 7.37 (t,  $J = 7.6$  Hz, 1H);  $^{13}\text{C}$  NMR ( $\text{CDCl}_3$ , 100 MHz)  $\delta$  168.0, 154.2, 135.1, 134.5, 133.1, 130.9, 128.8, 127.8, 127.5, 127.4, 126.8, 126.3, 125.2, 124.4, 123.2, 121.6. Characterization data matched those previously reported.

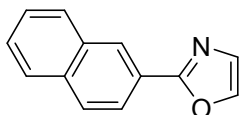

**2-(naphthalen-2-yl)oxazole (3aj):**<sup>11</sup> The title compound was prepared according to the general procedure II and purified by column chromatography on silica gel and eluted with petroleum ether: ethyl acetate = 10:1 (v:v) to afford a white solid in 63% yield (61.5 mg).  $^1\text{H}$  NMR ( $\text{CDCl}_3$ , 400 MHz)  $\delta$  8.52 (s, 1H), 8.12 (dd,  $J_1 = 8.8$  Hz,  $J_2 = 1.6$  Hz, 1H), 7.91-7.87 (m, 2H), 7.83-7.81 (m, 1H), 7.71 (d,  $J = 0.8$  Hz, 1H), 7.51-7.47 (m, 2H), 7.26 (s, 1H);  $^{13}\text{C}$  NMR ( $\text{CDCl}_3$ , 100 MHz)  $\delta$  162.0, 138.6, 134.0, 132.9, 128.6, 128.54, 128.5, 127.8, 127.1, 126.6, 126.2, 124.7, 123.2. Characterization data matched those previously reported.

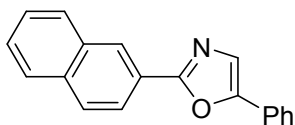

**2-(naphthalen-2-yl)-5-phenyloxazole (3ak):**<sup>1</sup> The title compound was prepared according to the general procedure II and purified by column chromatography on silica gel and eluted with petroleum ether: ethyl acetate = 10:1 (v:v) to afford a white solid in 92% yield (124.8 mg).  $^1\text{H}$  NMR ( $\text{CDCl}_3$ , 400 MHz)  $\delta$  8.52 (s, 1H), 8.14 (dd,  $J_1 = 8.4$  Hz,  $J_2 = 1.6$  Hz, 1H), 7.90-7.85 (m, 2H), 7.81-7.79 (m, 1H), 7.70 (d,  $J = 7.2$  Hz, 2H), 7.50-7.45 (m, 2H), 7.44 (s, 1H), 7.41 (t,  $J = 7.6$  Hz, 2H), 7.30 (t,  $J = 7.6$  Hz, 1H);  $^{13}\text{C}$  NMR ( $\text{CDCl}_3$ , 100 MHz)  $\delta$  161.1, 151.3, 134.0, 132.9, 128.8, 128.6, 128.5, 128.3, 127.9, 127.8, 127.1, 126.6, 126.0, 124.6, 124.1, 123.5, 123.1. Characterization data matched those previously reported.

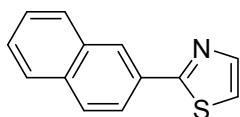

**2-(naphthalen-2-yl)thiazole (3al):**<sup>16</sup> The title compound was prepared according to the general procedure II and purified by column chromatography on silica gel and eluted with petroleum ether: ethyl acetate = 10:1 (v:v) to afford a yellow solid in 78% yield (82.4 mg). <sup>1</sup>H NMR (CDCl<sub>3</sub>, 400 MHz) δ 8.42 (s, 1H), 8.06 (dd, *J*<sub>1</sub> = 8.8 Hz, *J*<sub>2</sub> = 1.6 Hz, 1H), 7.91-7.86 (m, 3H), 7.83-7.80 (m, 1H), 7.51-7.46 (m, 2H), 7.31 (d, *J* = 3.2 Hz, 1H); <sup>13</sup>C NMR (CDCl<sub>3</sub>, 100 MHz) δ 168.4, 143.7, 134.0, 133.2, 130.9, 128.7, 128.5, 127.7, 126.9, 126.7, 125.9, 124.0, 118.9. Characterization data matched those previously reported.

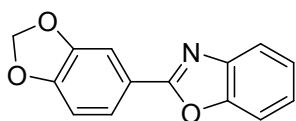

**2-(benzo[d][1,3]dioxol-5-yl)benzo[d]oxazole (3am):**<sup>9</sup> The title compound was prepared according to the general procedure I and purified by column chromatography on silica gel and eluted with petroleum ether: ethyl acetate = 20:1 (v:v) to afford a white solid in 76% yield (90.9 mg). <sup>1</sup>H NMR (CDCl<sub>3</sub>, 400 MHz) δ 7.67 (dd, *J*<sub>1</sub> = 8.0 Hz, *J*<sub>2</sub> = 1.6 Hz, 1H), 7.63-7.59 (m, 1H), 7.54 (d, *J* = 1.6 Hz, 1H), 7.42-7.38 (m, 1H), 7.22-7.16 (m, 2H), 6.78 (d, *J* = 8.4 Hz, 1H), 5.90 (s, 2H); <sup>13</sup>C NMR (CDCl<sub>3</sub>, 100 MHz) δ 162.7, 150.5, 150.4, 148.1, 142.0, 124.6, 124.4, 122.6, 121.0, 119.6, 110.3, 108.6, 107.5, 101.6. Characterization data matched those previously reported.

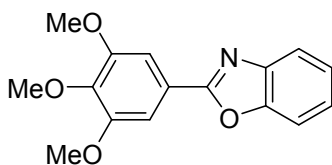

**2-(3,4,5-trimethoxyphenyl)benzo[d]oxazole (3an):**<sup>18</sup> The title compound was prepared according to the general procedure I and purified by column chromatography on silica gel and eluted with petroleum ether: ethyl acetate = 5:1 (v:v) to afford a light yellow solid in 83% yield (118.3 mg). <sup>1</sup>H NMR (CDCl<sub>3</sub>, 400 MHz) δ 7.78-7.75 (m, 1H), 7.59-7.56 (m, 1H), 7.50 (s, 2H), 7.36-7.34 (m, 2H), 3.99 (s, 6H), 3.94 (s, 3H); <sup>13</sup>C NMR (CDCl<sub>3</sub>, 100 MHz) δ 162.8, 153.5, 150.7, 142.0, 141.0, 125.0, 124.6, 122.2, 119.8, 110.4, 104.7, 60.9, 56.3. Characterization data matched those previously reported.

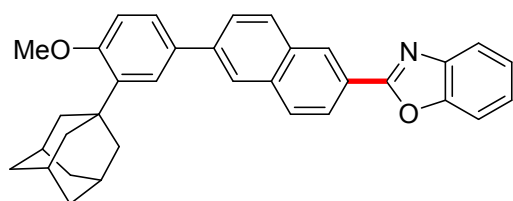

**2-(6-(3-adamantan-1-yl)-4-methoxyphenyl)naphthalen-2-yl)benzo[d]oxazole (3ao):** The title compound was prepared according to the general procedure I (0.3 mmol **1**, 0.2 mmol **2**, 2.5 mL cyclohexane) and purified by column chromatography on silica gel and eluted with petroleum ether: dichloromethane = 2:1 (v:v) to afford a yellow solid in 88% yield (85.5 mg). <sup>1</sup>H NMR



(CDCl<sub>3</sub>, 400 MHz)  $\delta$  8.78 (s, 1H), 8.32 (dd,  $J_1 = 8.8$  Hz,  $J_2 = 1.6$  Hz, 1H), 8.05-8.00 (m, 3H), 7.64-7.60 (m, 2H), 7.55 (dd,  $J_1 = 8.4$  Hz,  $J_2 = 2.4$  Hz, 1H), 7.40-7.35 (m, 2H), 7.00 (d,  $J = 8.4$  Hz, 1H), 3.91 (s, 3H), 2.19 (d,  $J = 2.4$  Hz, 6H), 2.11 (br, 3H), 1.81 (br, 6H); <sup>13</sup>C NMR (CDCl<sub>3</sub>, 100 MHz)  $\delta$  163.3, 158.9, 150.9, 142.3, 141.0, 139.0, 135.2, 132.6, 131.7, 129.3, 128.9, 127.9, 126.7, 125.9, 125.7, 125.1, 124.9, 124.6, 124.3, 123.9, 120.0, 112.1, 110.6, 55.2, 40.6, 37.2, 37.1, 29.1 HRMS (APCI): calcd for C<sub>34</sub>H<sub>31</sub>NO<sub>2</sub> [M+H]<sup>+</sup> m/z 486.2428; found 486.2433. m.p. 265.6-266.8 °C.

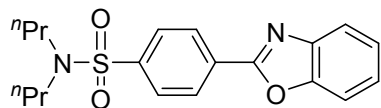

**4-(benzo[d]oxazol-2-yl)-N,N-dipropylbenzenesulfonamide (3ap):** The title compound was prepared according to the general procedure I and purified by column chromatography on silica gel and eluted with petroleum ether: dichloromethane = 1:2 (v:v) to afford a white solid in 72% yield (129.1 mg). <sup>1</sup>H NMR (CDCl<sub>3</sub>, 400 MHz)  $\delta$  8.32-8.30 (m, 2H), 7.90-7.88 (m, 2H), 7.76-7.71 (m, 1H), 7.57-7.53 (m, 1H), 7.36-7.30 (m, 2H), 3.09-3.05 (m, 4H), 1.55-1.45 (m, 4H), 0.81 (t,  $J = 7.6$  Hz, 6H); <sup>13</sup>C NMR (CDCl<sub>3</sub>, 100 MHz)  $\delta$  161.4, 150.9, 142.8, 141.9, 130.6, 128.1, 127.6, 125.9, 125.0, 120.5, 110.8, 49.9, 22.0, 11.2. HRMS(APCI): calcd for C<sub>19</sub>H<sub>22</sub>N<sub>2</sub>O<sub>3</sub>S [M+H]<sup>+</sup> m/z 359.1424; found 359.1428. m.p. 191.1-129.7 °C.

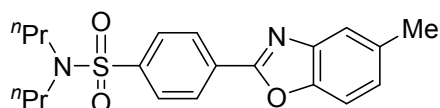

**4-(5-methylbenzo[d]oxazol-2-yl)-N,N-dipropylbenzenesulfonamide (3aq):** The title compound was prepared according to the general procedure I and purified by column chromatography on silica gel and eluted with petroleum ether: dichloromethane = 1:5 (v:v) to afford a white solid in 70% yield (130.4 mg). <sup>1</sup>H NMR (CDCl<sub>3</sub>, 400 MHz)  $\delta$  8.34 (d,  $J = 8.8$  Hz, 2H), 7.94 (d,  $J = 8.8$  Hz, 2H), 7.66 (d,  $J = 8.4$  Hz, 1H), 7.40 (s, 1H), 7.20 (dd,  $J_1 = 8.4$  Hz,  $J_2 = 0.8$  Hz, 1H), 3.16-3.12 (m, 4H), 2.52 (s, 3H), 1.61-1.52 (m, 4H), 0.89 (t,  $J = 7.6$  Hz, 6H); <sup>13</sup>C NMR (CDCl<sub>3</sub>, 100 MHz)  $\delta$  160.8, 151.1, 142.4, 139.7, 136.5, 130.7, 127.8, 127.5, 126.2, 119.7, 110.9, 49.9, 21.9, 21.8, 11.1. HRMS(APCI): calcd for C<sub>20</sub>H<sub>24</sub>N<sub>2</sub>O<sub>3</sub>S [M+H]<sup>+</sup> m/z 373.1580; found 373.1580. m.p. 183.1-183.9 °C.

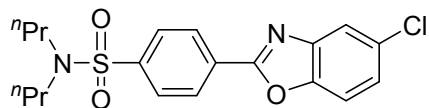

**4-(5-chlorobenzo[d]oxazol-2-yl)-N,N-dipropylbenzenesulfonamide (3ar):** The title compound was prepared according to the general procedure I and purified by column chromatography on silica gel and eluted with petroleum ether: dichloromethane = 1:5 (v:v) to afford a white solid in 71% yield (139.5 mg). <sup>1</sup>H NMR (CDCl<sub>3</sub>, 400 MHz)  $\delta$  8.36 (d,  $J = 8.8$  Hz, 2H), 7.97 (d,  $J = 8.4$  Hz, 2H), 7.77 (d,  $J = 2.0$  Hz, 1H), 7.54 (d,  $J = 8.8$  Hz, 1H), 7.37 (dd,  $J_1 = 8.8$  Hz,  $J_2 = 2.0$  Hz, 1H), 3.16-3.12 (m, 4H), 1.62-1.53 (m, 4H), 0.89 (t,  $J = 7.6$  Hz, 6H); <sup>13</sup>C NMR (CDCl<sub>3</sub>, 100 MHz)  $\delta$  162.6, 149.4, 143.1, 143.0, 130.5, 130.0, 128.2, 127.6, 126.2, 120.3, 111.5, 49.9, 21.9, 11.1. HRMS(APCI): calcd for C<sub>19</sub>H<sub>21</sub>N<sub>2</sub>O<sub>3</sub>SCl [M+H]<sup>+</sup> m/z 393.1034; found 393.1034. m.p. 208.9-209.5 °C.

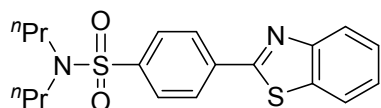

**4-(benzo[d]thiazol-2-yl)-N,N-dipropylbenzenesulfonamide (3as):** The title compound was prepared according to the general procedure I and purified by column chromatography on silica gel and eluted with petroleum ether: dichloromethane = 1:5 (v:v) to afford a white solid in 58% yield (108.6 mg).  $^1\text{H}$  NMR ( $\text{CDCl}_3$ , 400 MHz)  $\delta$  8.20 (d,  $J$  = 8.4 Hz, 2H), 8.10 (d,  $J$  = 7.6 Hz, 1H), 7.94-7.91 (m, 3H), 7.55-7.50 (m, 1H), 7.45-7.41 (m, 1H), 3.15-3.11 (m, 4H), 1.62-1.52 (m, 4H), 0.89 (t,  $J$  = 7.6 Hz, 6H);  $^{13}\text{C}$  NMR ( $\text{CDCl}_3$ , 100 MHz)  $\delta$  165.7, 153.9, 142.0, 136.9, 135.2, 127.9, 127.6, 126.6, 125.8, 123.6, 121.7, 49.9, 21.9, 11.1. CAS: 301235-28-9.

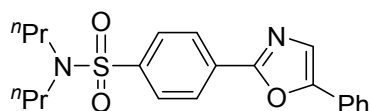

**4-(5-phenyloxazol-2-yl)-N,N-dipropylbenzenesulfonamide (3at):**<sup>17</sup> The title compound was prepared according to the general procedure I and purified by column chromatography on silica gel and eluted with petroleum ether: dichloromethane = 1:5 (v:v) to afford a white solid in 64% yield (123.0 mg).  $^1\text{H}$  NMR ( $\text{CDCl}_3$ , 400 MHz)  $\delta$  8.22 (d,  $J$  = 8.8 Hz, 2H), 7.92 (d,  $J$  = 8.8 Hz, 2H), 7.73 (d,  $J$  = 7.2 Hz, 2H), 7.49 (s, 1H), 7.46 (t,  $J$  = 8.0 Hz, 2H), 7.39-7.35 (m, 1H), 3.15-3.11 (m, 4H), 1.62-1.52 (m, 4H), 0.89 (t,  $J$  = 7.6 Hz, 6H);  $^{13}\text{C}$  NMR ( $\text{CDCl}_3$ , 100 MHz)  $\delta$  159.4, 152.2, 141.4, 130.6, 129.0, 128.8, 127.5, 127.4, 126.5, 124.3, 123.8, 49.8, 21.8, 11.1. Characterization data matched those previously reported.

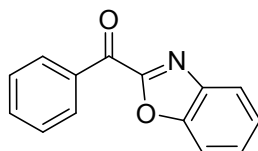

**benzo[d]oxazol-2-yl(phenyl)methanone (4a):**<sup>21</sup> The title compound was prepared according to the general procedure III (dp<sub>ph</sub> 10 mol%) and purified by column chromatography on silica gel and eluted with petroleum ether: ethyl acetate = 20:1 (v:v) to afford a white solid in 90% yield (100.5 mg).  $^1\text{H}$  NMR ( $\text{CDCl}_3$ , 400 MHz)  $\delta$  8.42 (d,  $J$  = 8.4 Hz, 2H), 7.81 (d,  $J$  = 8.0 Hz, 1H), 7.58-7.53 (m, 2H), 7.45-7.39 (m, 3H), 7.35-7.31 (m, 1H);  $^{13}\text{C}$  NMR ( $\text{CDCl}_3$ , 100 MHz)  $\delta$  180.3, 156.9, 150.2, 140.6, 134.8, 134.1, 130.8, 128.4, 128.3, 125.6, 122.2, 111.7. Characterization data matched those previously reported.

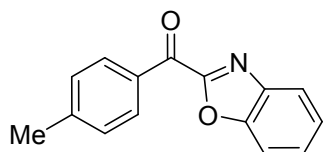

**benzo[d]oxazol-2-yl(p-tolyl)methanone (4b):**<sup>21</sup> The title compound was prepared according to the general procedure III and purified by column chromatography on silica gel and eluted with petroleum ether: ethyl acetate = 10:1 (v:v) to afford a white solid in 80% yield (94.9 mg).  $^1\text{H}$  NMR ( $\text{CDCl}_3$ , 400 MHz)  $\delta$  8.46 (d,  $J$  = 8.0 Hz, 2H), 7.93 (d,  $J$  = 8.0 Hz, 1H), 7.69 (d,  $J$  = 8.4 Hz,

1H), 7.55-7.50 (m, 1H), 7.47-7.43 (m, 1H), 7.35 (d,  $J = 8.0$  Hz, 2H), 2.45 (s, 3H);  $^{13}\text{C}$  NMR ( $\text{CDCl}_3$ , 100 MHz)  $\delta$  180.0, 157.2, 150.3, 145.4, 140.7, 132.4, 131.1, 129.3, 128.2, 125.5, 122.2, 111.7, 21.8. Characterization data matched those previously reported.

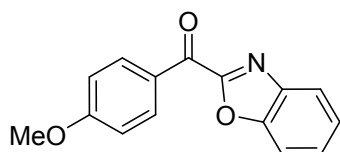

**benzo[d]oxazol-2-yl(4-methoxyphenyl)methanone (4c):**<sup>21</sup> The title compound was prepared according to the general procedure III and purified by column chromatography on silica gel and eluted with petroleum ether: ethyl acetate = 10:1 (v:v) to afford a white solid in 82% yield (103.8 mg).  $^1\text{H}$  NMR ( $\text{CDCl}_3$ , 400 MHz)  $\delta$  8.62-8.58 (m, 2H), 7.94-7.91 (m, 1H), 7.70-7.68 (m, 1H), 7.54-7.50 (m, 1H), 7.47-7.43 (m, 1H), 7.04-7.01 (m, 2H), 3.90 (s, 3H);  $^{13}\text{C}$  NMR ( $\text{CDCl}_3$ , 100 MHz)  $\delta$  178.7, 164.6, 157.4, 150.3, 140.7, 133.6, 128.1, 128.0, 125.5, 122.2, 113.9, 111.8, 55.6. Characterization data matched those previously reported.

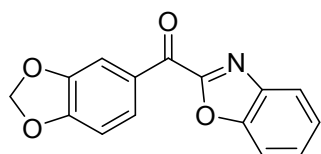

**benzo[d][1,3]dioxol-5-yl(benzo[d]oxazol-2-yl)methanone (4d):**<sup>21</sup> The title compound was prepared according to the general procedure III and purified by column chromatography on silica gel and eluted with petroleum ether: ethyl acetate = 5:1 (v:v) to afford a yellow solid in 75% yield (100.2 mg).  $^1\text{H}$  NMR ( $\text{CDCl}_3$ , 400 MHz)  $\delta$  8.38 (dd,  $J_1 = 8.4$  Hz,  $J_2 = 2.0$  Hz, 1H), 8.00 (d,  $J = 2.0$  Hz, 1H), 7.93 (d,  $J = 8.0$  Hz, 1H), 7.70 (d,  $J = 8.0$  Hz, 1H), 7.56-7.51 (m, 1H), 7.48-7.44 (m, 1H), 6.96 (d,  $J = 8.4$  Hz, 1H), 6.10 (s, 2H);  $^{13}\text{C}$  NMR ( $\text{CDCl}_3$ , 100 MHz)  $\delta$  178.2, 157.2, 153.1, 150.3, 148.1, 140.6, 129.5, 128.6, 128.2, 125.6, 122.2, 111.7, 110.2, 108.2, 102.1. Characterization data matched those previously reported.

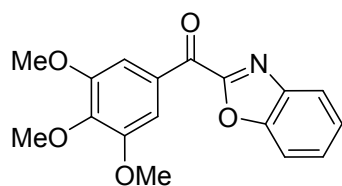

**benzo[d]oxazol-2-yl(3,4,5-trimethoxyphenyl)methanone (4e):**<sup>22</sup> The title compound was prepared according to the general procedure III and purified by column chromatography on silica gel and eluted with petroleum ether: ethyl acetate = 5:1 (v:v) to afford a yellow solid in 85% yield (133.2 mg).  $^1\text{H}$  NMR ( $\text{CDCl}_3$ , 400 MHz)  $\delta$  7.96-7.94 (m, 3H), 7.72 (d,  $J = 8.0$  Hz, 1H), 7.58-7.54 (m, 1H), 7.51-7.46 (m, 1H), 3.99 (s, 3H), 3.99 (s, 6H);  $^{13}\text{C}$  NMR ( $\text{CDCl}_3$ , 100 MHz)  $\delta$  178.9, 157.2, 152.9, 150.3, 144.0, 140.7, 129.8, 128.3, 125.6, 122.3, 111.8, 108.7, 61.0, 56.4. Characterization data matched those previously reported.

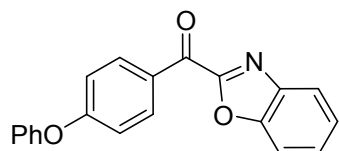

**benzo[d]oxazol-2-yl(4-phenoxyphenyl)methanone (4f):** The title compound was prepared according to the general procedure III and purified by column chromatography on silica gel and eluted with petroleum ether: ethyl acetate = 10:1 (v:v) to afford a light yellow solid in 92% yield (145.0 mg).  $^1\text{H}$  NMR ( $\text{CDCl}_3$ , 400 MHz)  $\delta$  8.61-8.57 (m, 2H), 7.90 (d,  $J$  = 8.0 Hz, 1H), 7.68 (d,  $J$  = 8.0 Hz, 1H), 7.53-7.49 (m, 1H), 7.46-7.38 (m, 3H), 7.23-7.19 (m, 1H), 7.12-7.05 (m, 4H);  $^{13}\text{C}$  NMR ( $\text{CDCl}_3$ , 100 MHz)  $\delta$  178.6, 163.2, 157.1, 154.9, 150.2, 140.6, 133.4, 130.0, 129.3, 128.1, 125.5, 124.8, 122.1, 120.4, 117.0, 111.7. HRMS(ESI): calcd for  $\text{C}_{20}\text{H}_{13}\text{NO}_3$   $[\text{M}+\text{H}]^+$   $m/z$  316.0968; found 316.0968. m.p. 66.2-67.1  $^\circ\text{C}$ .

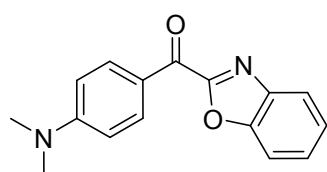

**benzo[d]oxazol-2-yl(4-dimethylaminophenyl)methanone (4g):** The title compound was prepared according to the general procedure III and purified by column chromatography on silica gel and eluted with petroleum ether: ethyl acetate = 10:1 (v:v) to afford a yellow solid in 82% yield (109.2 mg).  $^1\text{H}$  NMR ( $\text{CDCl}_3$ , 400 MHz)  $\delta$  8.56-8.52 (m, 2H), 7.91 (d,  $J$  = 8.0 Hz, 1H), 7.69 (d,  $J$  = 8.0 Hz, 1H), 7.51-7.48 (m, 1H), 7.46-7.41 (m, 1H), 6.75-6.71 (m, 2H), 3.11 (s, 6H);  $^{13}\text{C}$  NMR ( $\text{CDCl}_3$ , 100 MHz)  $\delta$  177.6, 158.2, 154.2, 150.2, 140.8, 133.5, 127.5, 125.2, 122.78, 121.8, 111.6, 110.7, 40.0. HRMS(ESI): calcd for  $\text{C}_{16}\text{H}_{14}\text{N}_2\text{O}_2$   $[\text{M}+\text{H}]^+$   $m/z$  267.1128; found 267.1128. m.p. 151.1-152.2  $^\circ\text{C}$ .

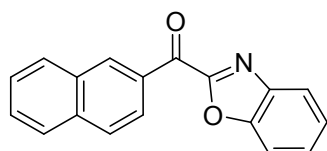

**benzo[d]oxazol-2-yl(naphthalen-2-yl)methanone (4h):**<sup>21</sup> The title compound was prepared according to the general procedure III and purified by column chromatography on silica gel and eluted with petroleum ether: ethyl acetate = 10:1 (v:v) to afford a light yellow solid in 78% yield (106.6 mg).  $^1\text{H}$  NMR ( $\text{CDCl}_3$ , 400 MHz)  $\delta$  9.30 (s, 1H), 8.41 (dd,  $J_1$  = 8.4 Hz,  $J_2$  = 1.6 Hz, 1H), 8.05 (d,  $J$  = 8.4 Hz, 1H), 7.98-7.93 (m, 2H), 7.87 (d,  $J$  = 8.0 Hz, 1H), 7.71 (d,  $J$  = 8.0 Hz, 1H), 7.64-7.60 (m, 1H), 7.58-7.52 (m, 2H), 7.49-7.45 (m, 1H);  $^{13}\text{C}$  NMR ( $\text{CDCl}_3$ , 100 MHz)  $\delta$  180.0, 157.1, 150.3, 140.7, 135.9, 134.2, 132.2, 132.1, 130.2, 129.2, 128.3, 128.2, 127.7, 126.8, 125.6, 125.2, 122.3, 111.7. Characterization data matched those previously reported.

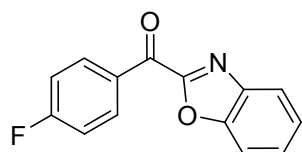

**benzo[d]oxazol-2-yl(4-fluorophenyl)methanone (4i):**<sup>21</sup> The title compound was prepared according to the general procedure III and purified by column chromatography on silica gel and eluted with petroleum ether: ethyl acetate = 10:1 (v:v) to afford a white solid in 81% yield (97.7 mg). <sup>1</sup>H NMR (CDCl<sub>3</sub>, 400 MHz) δ 8.69-8.64 (m, 2H), 7.94 (d, *J* = 8.0 Hz, 1H), 7.71 (d, *J* = 8.4 Hz, 1H), 7.58-7.54 (m, 1H), 7.50-7.46 (m, 1H), 7.27-7.21 (m, 2H); <sup>13</sup>C NMR (CDCl<sub>3</sub>, 100 MHz) δ 178.7, 166.6 (d, *J*<sub>C-F</sub> = 255.8 Hz), 156.9, 150.3, 140.6, 133.9 (d, *J*<sub>C-F</sub> = 9.4 Hz), 131.3 (d, *J*<sub>C-F</sub> = 2.8 Hz), 128.5, 125.8, 122.3, 115.8 (d, *J*<sub>C-F</sub> = 21.8 Hz), 111.8. <sup>19</sup>F NMR (CDCl<sub>3</sub>, 376 MHz) δ 102.5. Characterization data matched those previously reported.

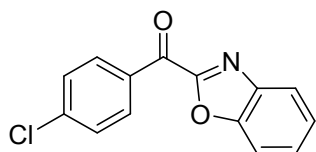

**benzo[d]oxazol-2-yl(4-chlorophenyl)methanone (4j):**<sup>21</sup> The title compound was prepared according to the general procedure III and purified by column chromatography on silica gel and eluted with petroleum ether: ethyl acetate = 10:1 (v:v) to afford a white solid in 75% yield (96.6 mg). <sup>1</sup>H NMR (CDCl<sub>3</sub>, 400 MHz) δ 8.57-8.54 (m, 2H), 7.96-7.93 (m, 1H), 7.72-7.70 (m, 1H), 7.58-7.52 (m, 3H), 7.50-7.46 (m, 1H); <sup>13</sup>C NMR (CDCl<sub>3</sub>, 100 MHz) δ 179.1, 156.8, 150.4, 141.0, 140.6, 133.2, 132.4, 129.0, 128.6, 125.8, 122.4, 111.8. Characterization data matched those previously reported.

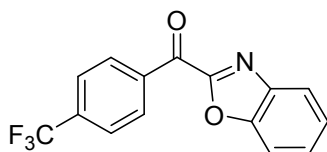

**benzo[d]oxazol-2-yl(4-trifluoromethylphenyl)methanone (4k):**<sup>21</sup> The title compound was prepared according to the general procedure III (dpph 10 mol%, 100°C) and purified by column chromatography on silica gel and eluted with petroleum ether: ethyl acetate = 10:1 (v:v) to afford a white solid in 66% yield (96.1 mg). <sup>1</sup>H NMR (CDCl<sub>3</sub>, 400 MHz) δ 8.68 (d, *J* = 8.0 Hz, 2H), 7.96 (d, *J* = 8.4 Hz, 1H), 7.83 (d, *J* = 8.4 Hz, 2H), 7.32 (d, *J* = 8.4 Hz, 1H), 7.60-7.56 (m, 1H), 7.52-7.48 (m, 1H); <sup>13</sup>C NMR (CDCl<sub>3</sub>, 100 MHz) δ 179.4, 156.6, 150.5, 140.6, 137.6 (d, *J*<sub>C-F</sub> = 1.0 Hz), 135.2 (q, *J*<sub>C-F</sub> = 32.6 Hz), 131.3, 128.9, 126.0, 125.5 (q, *J*<sub>C-F</sub> = 3.7 Hz), 123.5 (q, *J*<sub>C-F</sub> = 271.4 Hz), 122.5, 111.9. <sup>19</sup>F NMR (CDCl<sub>3</sub>, 376 MHz) δ 63.3. Characterization data matched those previously reported.

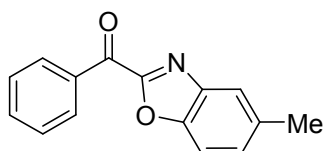

**(5-methylbenzo[d]oxazol-2-yl)(phenyl)methanone (4l):**<sup>21</sup> The title compound was prepared according to the general procedure III and purified by column chromatography on silica gel and eluted with petroleum ether: ethyl acetate = 10:1 (v:v) to afford a white solid in 65% yield (77.1 mg). <sup>1</sup>H NMR (CDCl<sub>3</sub>, 400 MHz) δ 8.55-8.52 (m, 2H), 7.80 (d, *J* = 8.4 Hz, 1H), 7.69-7.65 (m, 1H), 7.55 (t, *J* = 8.0 Hz, 2H), 7.49-7.48 (m, 1H), 7.28 (dd, *J*<sub>1</sub> = 8.0 Hz, *J*<sub>2</sub> = 0.8 Hz, 1H), 2.54 (s,

3H);  $^{13}\text{C}$  NMR ( $\text{CDCl}_3$ , 100 MHz)  $\delta$  180.4, 156.8, 150.7, 139.5, 138.6, 135.1, 134.1, 130.9, 128.5, 127.3, 121.6, 111.6, 22.05. Characterization data matched those previously reported.

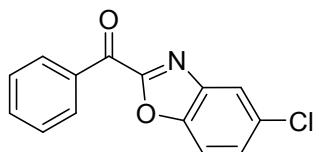

**(5-chlorobenzo[d]oxazol-2-yl)(phenyl)methanone (4m):**<sup>21</sup> The title compound was prepared according to the general procedure III and purified by column chromatography on silica gel and eluted with petroleum ether: ethyl acetate = 10:1 (v:v) to afford a white solid in 56% yield (72.1 mg).  $^1\text{H}$  NMR ( $\text{CDCl}_3$ , 400 MHz)  $\delta$  8.53 (d,  $J$  = 8.0 Hz, 2H), 7.92-7.91 (m, 1H), 7.71-7.68 (m, 1H), 7.65-7.62 (m, 1H), 7.59-7.55 (m, 2H), 7.52-7.50 (m, 1H);  $^{13}\text{C}$  NMR ( $\text{CDCl}_3$ , 100 MHz)  $\delta$  180.0, 158.0, 148.9, 141.6, 134.7, 134.5, 131.2, 131.0, 128.8, 128.6, 122.0, 112.6. Characterization data matched those previously reported.

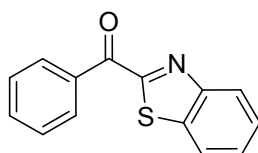

**benzo[d]thiazol-2-yl(phenyl)methanone (4n):**<sup>21</sup> The title compound was prepared according to the general procedure III (dpph 10 mol%) and purified by column chromatography on silica gel and eluted with petroleum ether: ethyl acetate = 10:1 (v:v) to afford a light yellow solid in 66% yield (79.0 mg).  $^1\text{H}$  NMR ( $\text{CDCl}_3$ , 400 MHz)  $\delta$  8.56 (d,  $J$  = 6.8 Hz, 2H), 8.25 (d,  $J$  = 7.6 Hz, 1H), 8.03 (d,  $J$  = 7.6 Hz, 1H), 7.69-7.65 (m, 1H), 7.62-7.53 (m, 4H);  $^{13}\text{C}$  NMR ( $\text{CDCl}_3$ , 100 MHz)  $\delta$  185.4, 167.1, 153.9, 137.0, 135.0, 133.9, 131.3, 128.5, 127.6, 126.9, 125.7, 122.2. Characterization data matched those previously reported.

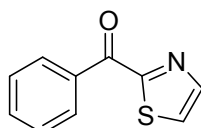

**(thiazol-2-yl)(phenyl)methanone (4o):**<sup>23</sup> The title compound was prepared according to the general procedure III (dpph 10 mol%) and purified by column chromatography on silica gel and eluted with petroleum ether: ethyl acetate = 10:1 (v:v) to afford a white solid in 56% yield (53.0 mg).  $^1\text{H}$  NMR ( $\text{CDCl}_3$ , 400 MHz)  $\delta$  8.48-8.46 (m, 2H), 8.10 (d,  $J$  = 2.8 Hz, 1H), 7.73 (d,  $J$  = 2.8 Hz, 1H), 7.66-7.62 (m, 1H), 7.55-7.51 (m, 2H);  $^{13}\text{C}$  NMR ( $\text{CDCl}_3$ , 100 MHz)  $\delta$  184.2, 167.8, 144.8, 135.1, 133.6, 131.0, 128.4, 126.2. Characterization data matched those previously reported.

## 4. Reference

1. Muto, K.; Yamaguchi, J.; Itami, K. *J. Am. Chem. Soc.* **2012**, 134, 169-172.
2. Do, H.-Q.; Daugulis, O. *J. Am. Chem. Soc.* **2007**, 129, 12404-12405.
3. Wang, L.; Ren, X.-y.; Yu, J.-t.; Jiang, Y.; Cheng, J. *J. Org. Chem.* **2013**, 78, 23, 12076-12081.
4. Amaike, K.; Muto, K.; Yamaguchi, J.; Itami, K. *J. Am. Chem. Soc.* **2012**, 134, 13573-13576.
5. Gao, F.; Kim, B.-S.; Walsh, P. J. *Chem. Commun.* **2014**, 50(73), 10661-10664.
6. Nguyen, L. A.; Dang, T. D.; Ngo, Q. A.; Nguyen, T. B. *Eur. J. Org. Chem.* **2020**, 2020(25), 3818-3821.
7. Wang, L.; Ma, Z.-G.; Wei, X.-J.; Meng, Q.-Y.; Yang, D.-T.; Du, S.-F.; Chen, Z.-F.; Wu, L.-Z.; Liu, Q. *Green Chem.* **2014**, 16, 3752-3757.
8. Yin, Y.-Z.; Yue, X.-Y.; Zhong, Q.; Jiang, H.-M.; Bai, R.-P.; Lan, Y.; Zhang, H. *Adv. Synth. Catal.* **2018**, 360(8), 1639-1643.
9. Iwai, T.; Harada, T.; Shimada, H.; Asano, K.; Sawamura, M. *ACS Catal.* **2017**, 7, 1681-1692.
10. Varma, R. S.; Chauhan, S. M.; Prasad, C. R. *Indian Journal of Chemistry, Section B: Organic Chemistry Including Medicinal Chemistry*, **1985**, 24B(3), 280-5.
11. Zhu, F.; Wang, Z.-X. *Org. Lett.* **2015**, 17, 1601-1604.
12. Zhang, G.-D.; Wang, P.; Yang, Fan.; Wu, Y.-J. *Tetrahedron* **2015**, 71, 57-63.
13. Liu, Z.-L.; Dong, N.-N.; Xu, M.-Z.; Sun, Z.-M.; Tu, T. *J. Org. Chem.* **2013**, 78, 15, 7436-7444.
14. Li, F.-X.; Li, Z.-Q.; Tang, X.-Y.; Cao, X.-Y.; Wang, C.-Y.; Li, J.-L.; Wang, Lei. *ChemCatChem*. **2019**, 11(4), 1192-1195.
15. Tan, G.-Y.; Zhu, L.; Liao, X.-R.; Lan, Y.; You, J.-S. *J. Am. Chem. Soc.* **2017**, 139, 15724-15737.
16. Xu, X.-B.; Zhao, Y.-B.; Dang, J.-S.; Yang, X.-L.; Zhou, G.-J.; Ma, D.-G.; Wang, L.-X.; Wong, W.-Y.; Wu, Z.-X.; Zhao, X. *Eur. J. Inorg. Chem.* **2012**, 13, 2278-2288.
17. Mendoza, J. S.; Dickson, J. K. J.; Hodge, C. N. *PCT Int. Appl.*, 2007149395, 27 Dec 2007.
18. Ferguson, D. M.; Rudolph, S. R.; Kalyani, D. *ACS Catal.* **2014**, 4, 2395-2401.
19. Hachiya, H.; Hirano, K.; Satoh, T.; Miura, M. *Org. Lett.* **2009**, 11, 1737-1740.
20. Shibahara, F.; Yamaguchi, E.; Murai, T. *Chem. Commun.* **2010**, 46, 2471-2473.
21. Jiang, J.; Zou, H.-X.; Dong, Q.-Z.; Wang, R.-J.; Lu, L.-H.; Zhu, Y.-G.; He, W.-M. *J. Org. Chem.* **2016**, 81, 51-56.
22. Chen, J.-J.; Li, C.-M.; Wang, J.; Ahn, S.; Wang, Z.; Lu, Y.; Dalton, J. T.; Miller, D. D.; Li, Wei. *Bioorg. Med. Chem.* **2011**, 19, 4782-4795.
23. Huang, T.-H.; Wu, X.; Yu, Y.-B.; An, L.; Yin, X.-X. *Tetrahedron Letters*. **2019**, 60(25), 1667-1670.
24. Xiao, J.; Chen, T.-Q.; Han, L.-B. *Org. Lett.* **2015**, 17, 812-815.

## 5. <sup>1</sup>H, <sup>13</sup>C and <sup>19</sup>F NMR Spectra of Products

<sup>1</sup>H NMR (400 MHz, CDCl<sub>3</sub>)

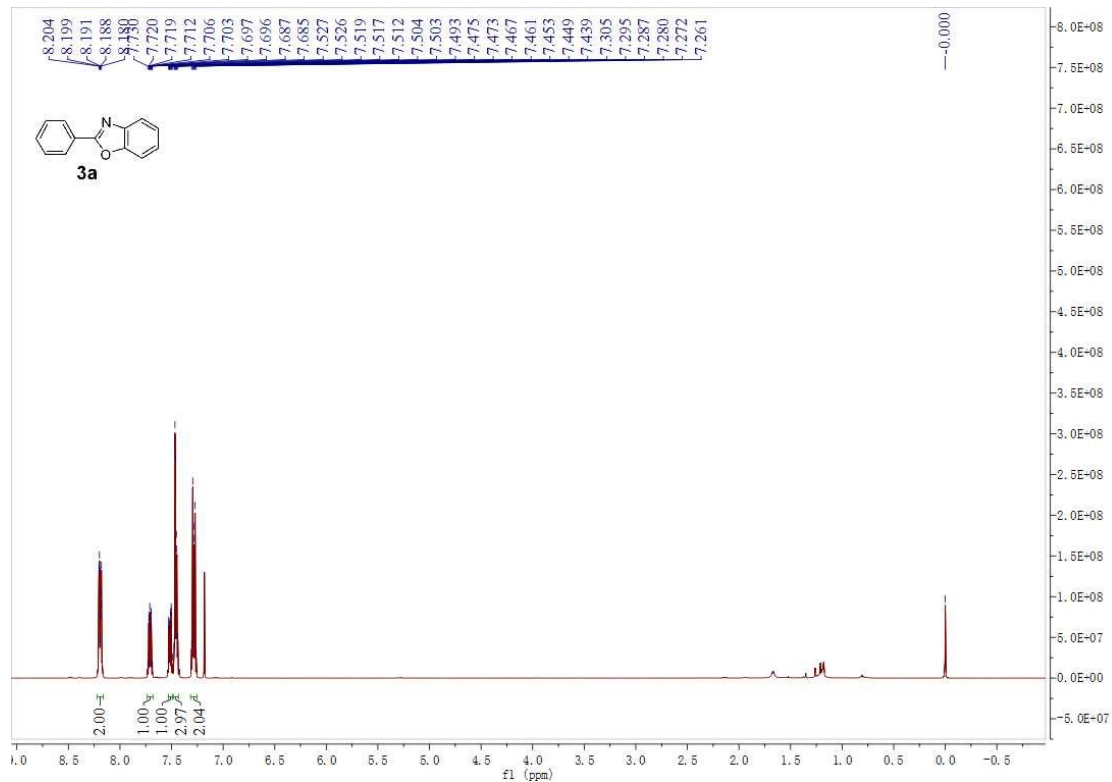

<sup>13</sup>C NMR (100 MHz, CDCl<sub>3</sub>)

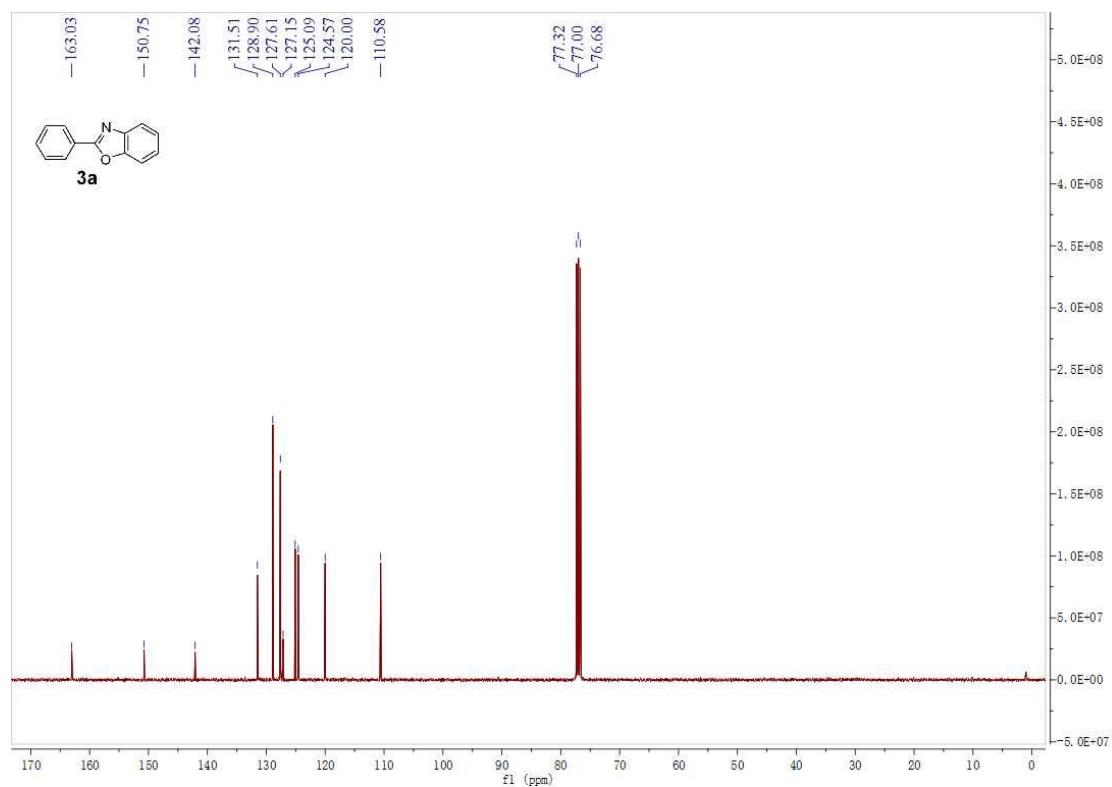



<sup>1</sup>H NMR (400 MHz, CDCl<sub>3</sub>)

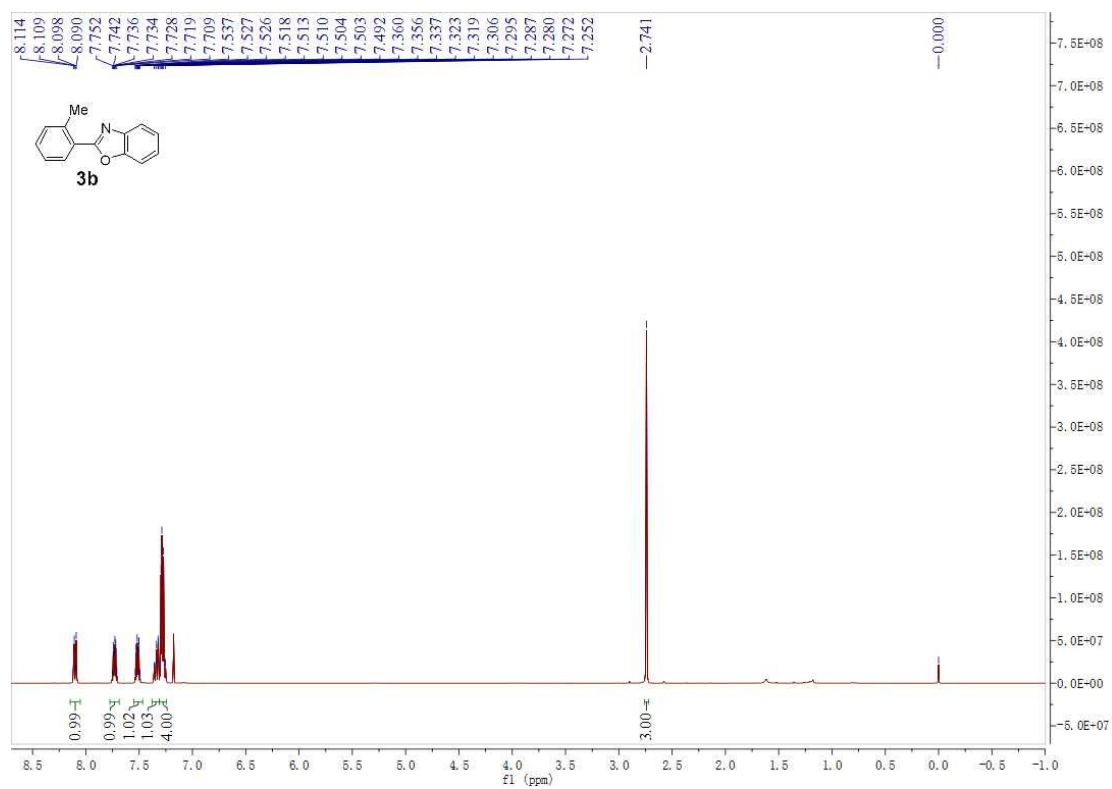

<sup>13</sup>C NMR (100 MHz, CDCl<sub>3</sub>)

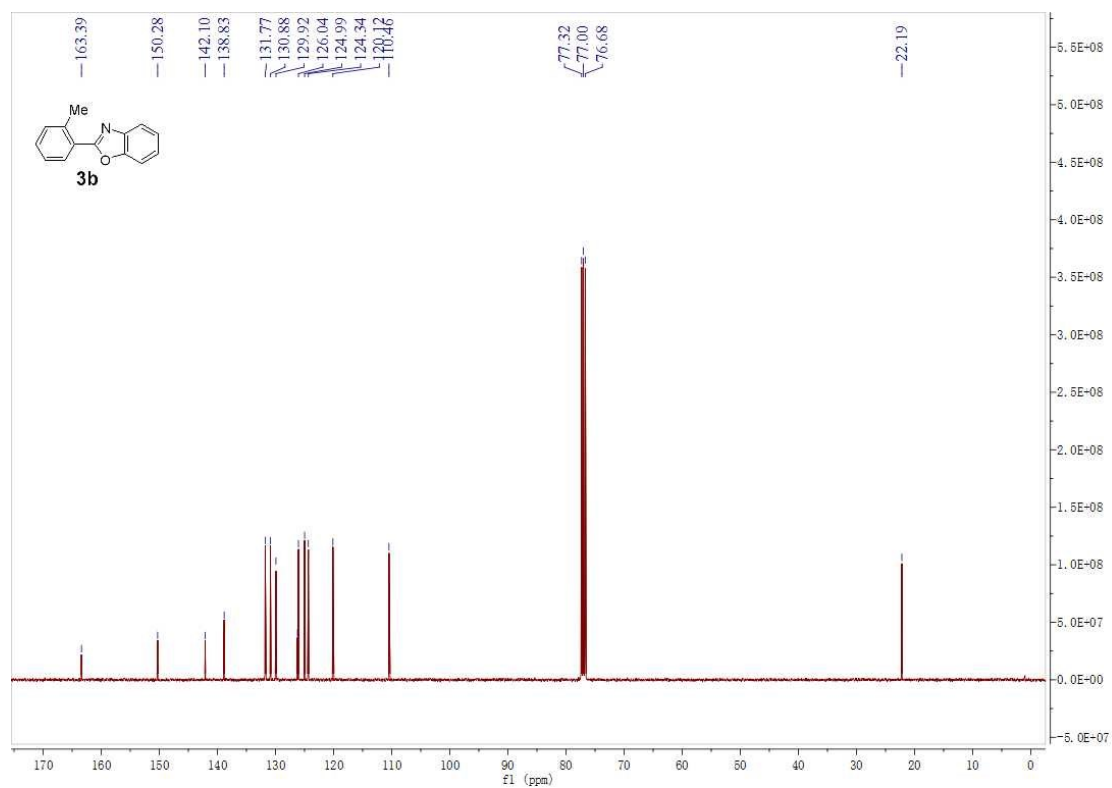

<sup>1</sup>H NMR (400 MHz, CDCl<sub>3</sub>)

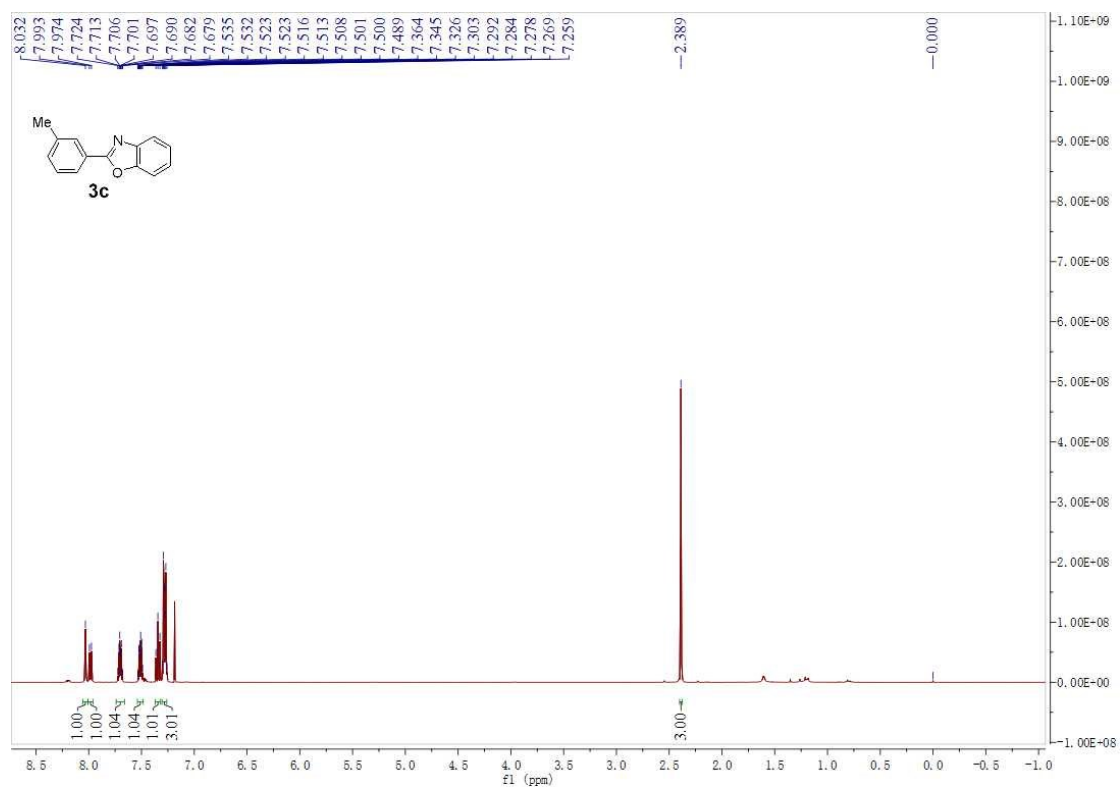

<sup>13</sup>C NMR (100 MHz, CDCl<sub>3</sub>)

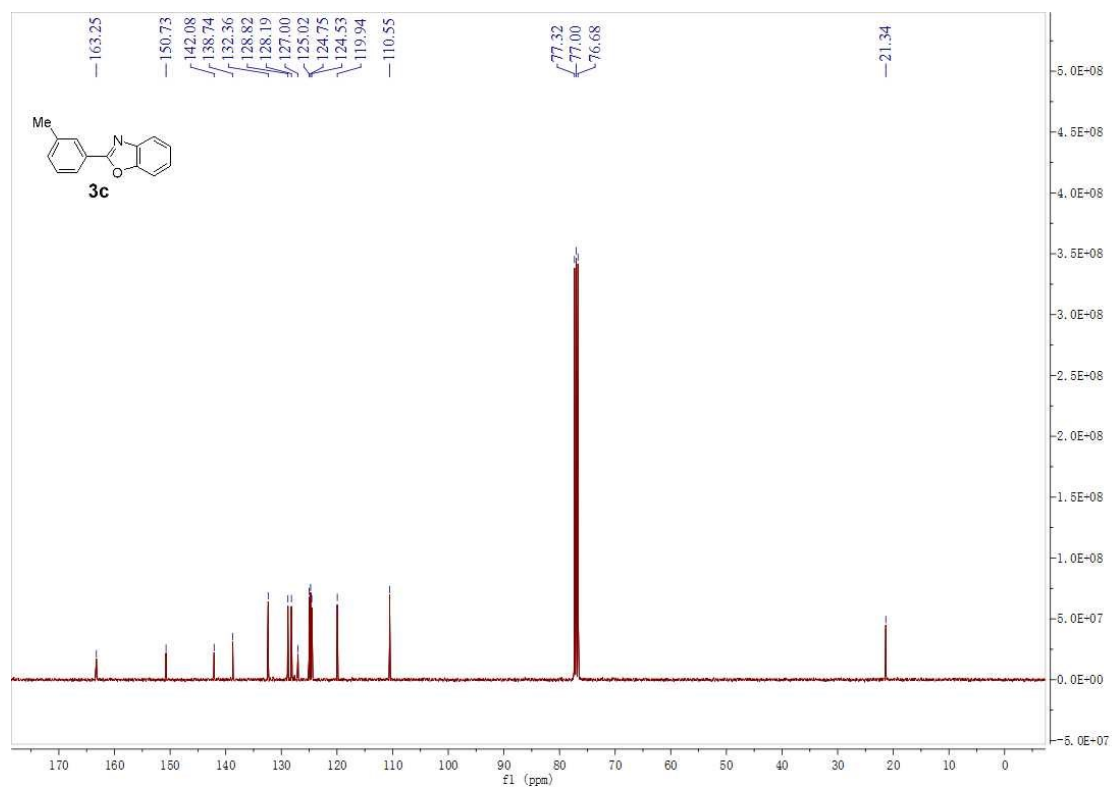

<sup>1</sup>H NMR (400 MHz, CDCl<sub>3</sub>)

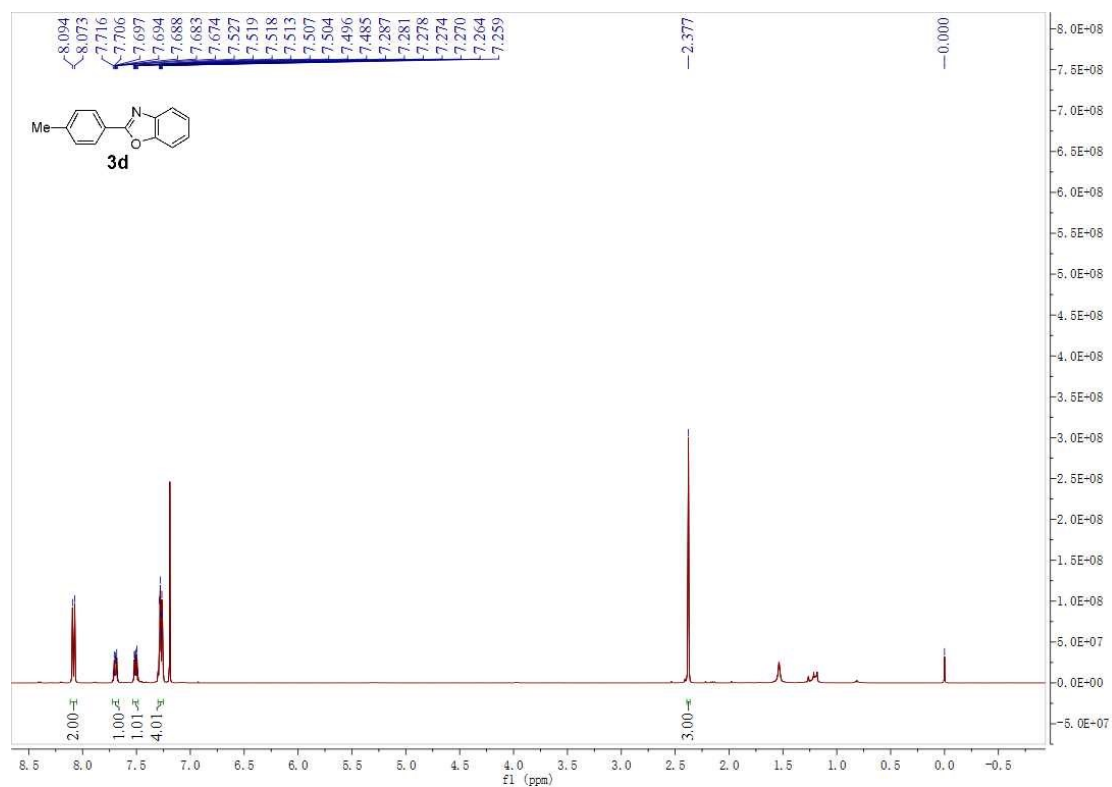

<sup>13</sup>C NMR (100 MHz, CDCl<sub>3</sub>)

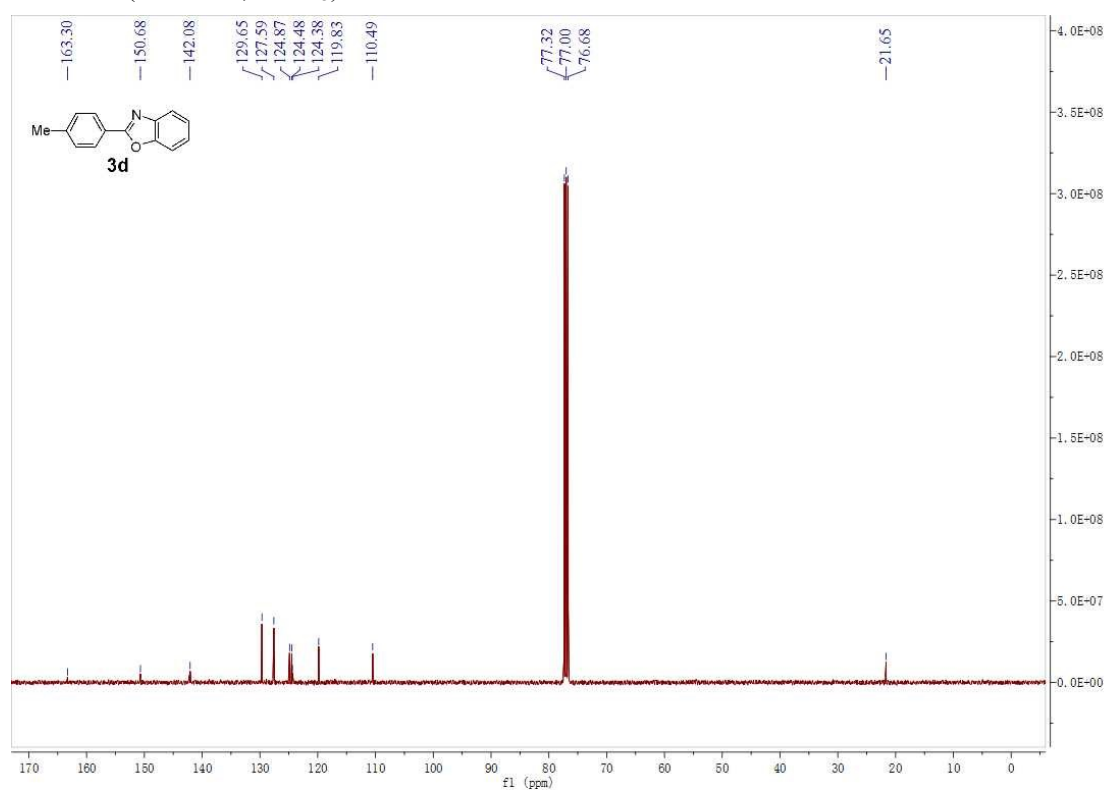

<sup>1</sup>H NMR (400 MHz, CDCl<sub>3</sub>)

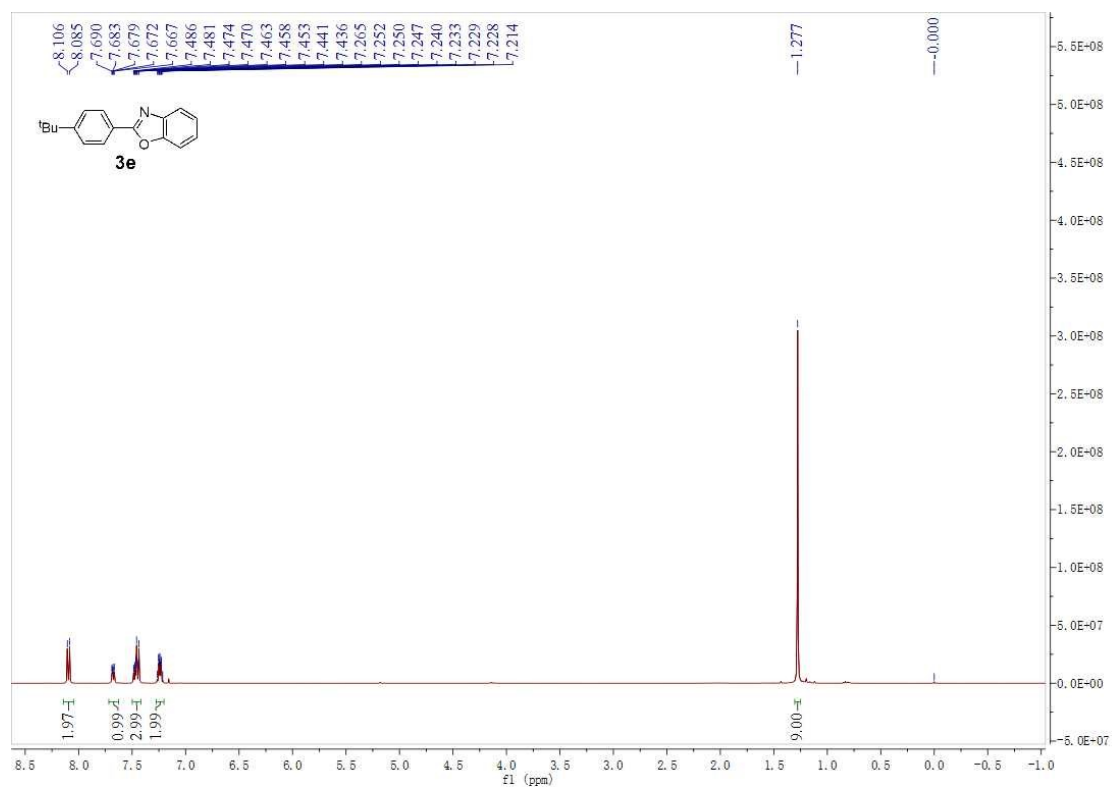

<sup>13</sup>C NMR (100 MHz, CDCl<sub>3</sub>)

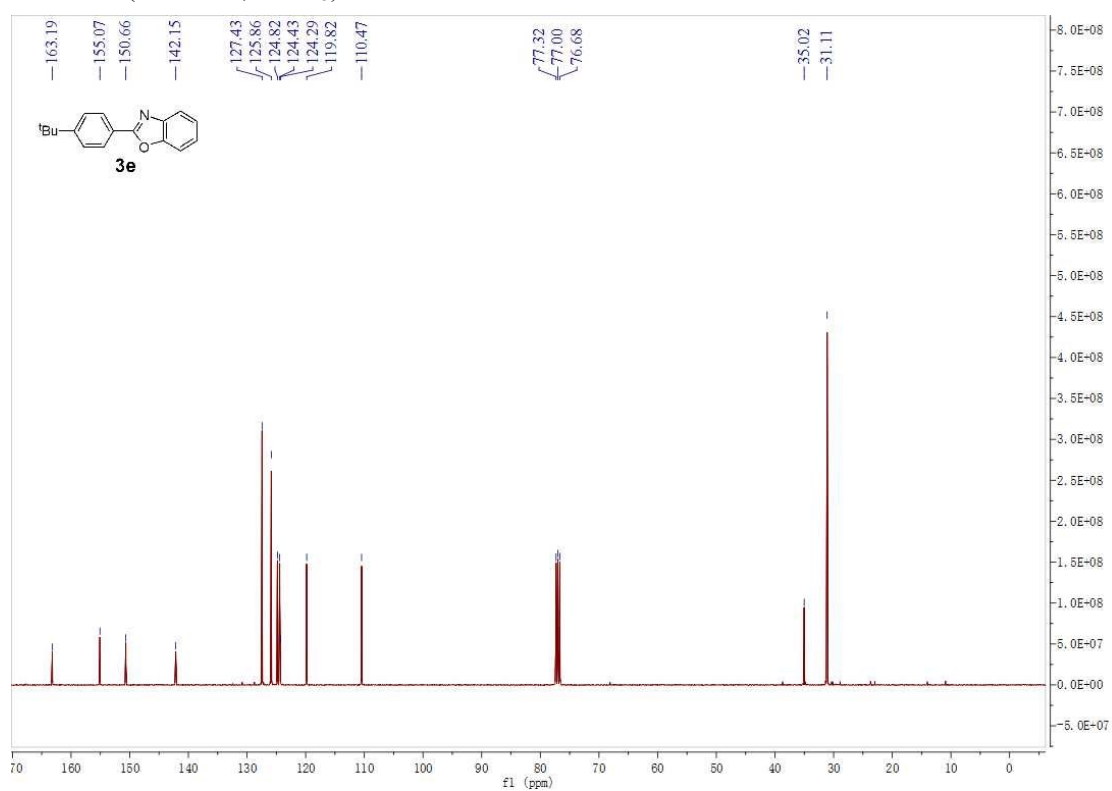

<sup>1</sup>H NMR (400 MHz, CDCl<sub>3</sub>)

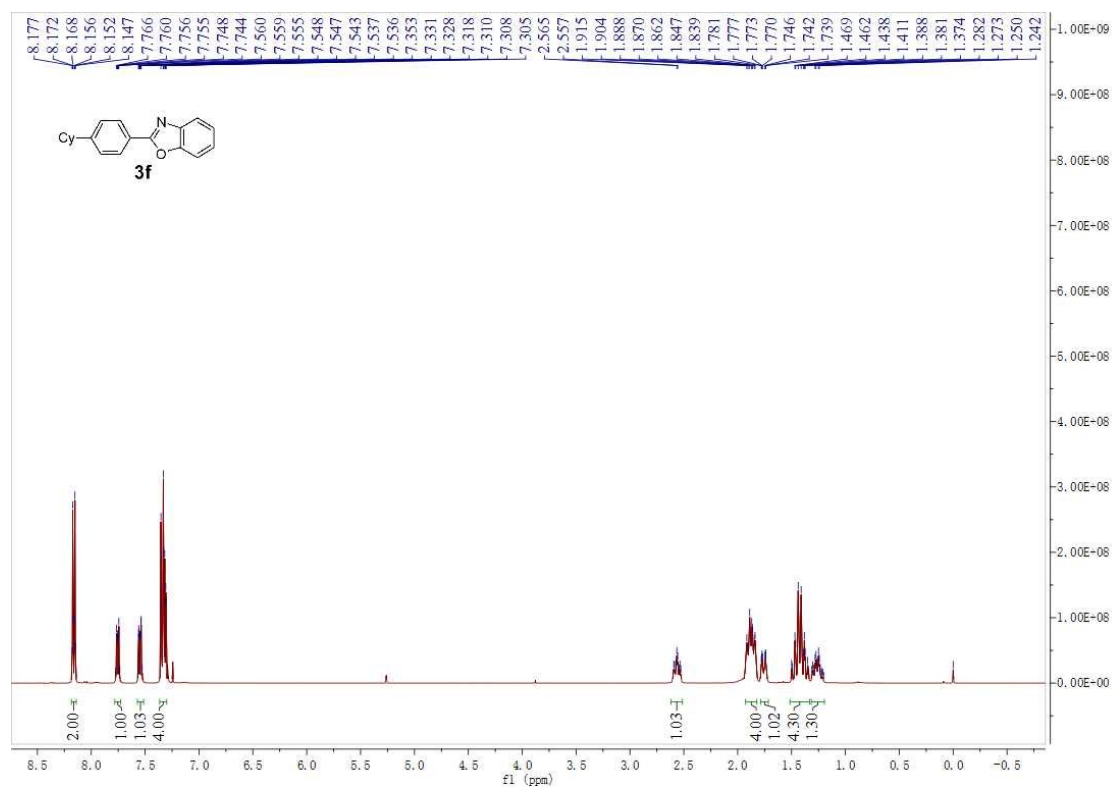

<sup>13</sup>C NMR (100 MHz, CDCl<sub>3</sub>)

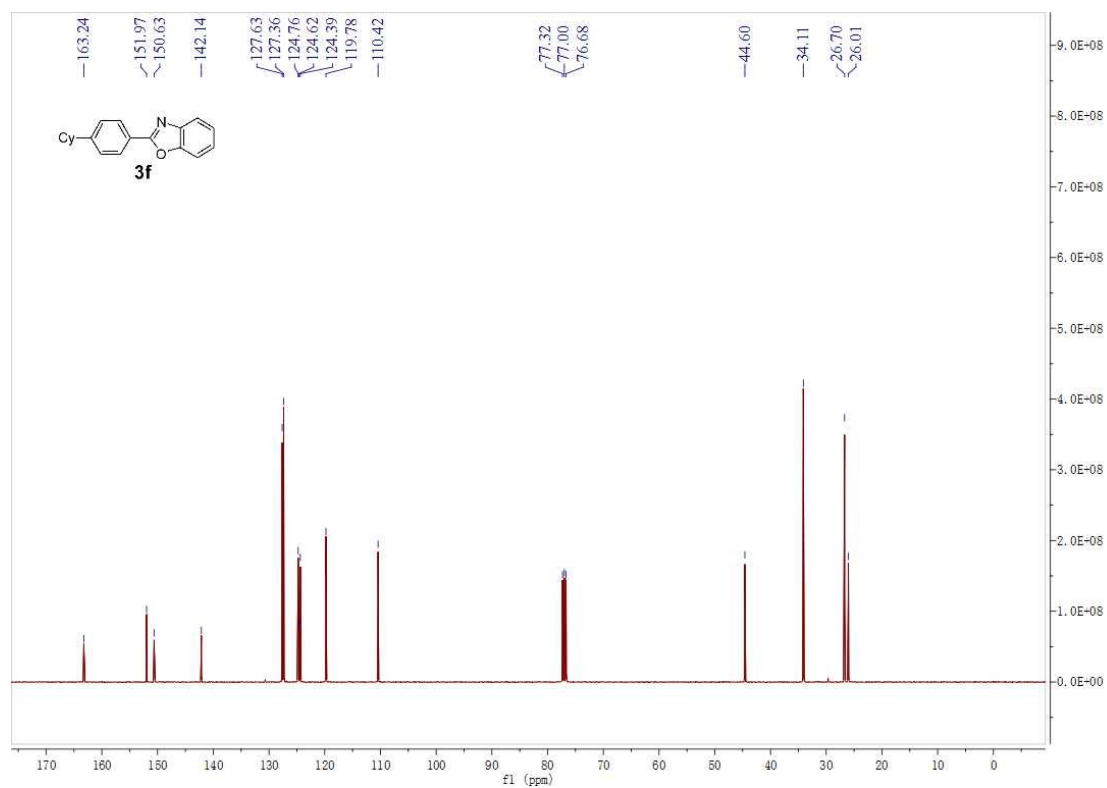

<sup>1</sup>H NMR (400 MHz, CDCl<sub>3</sub>)

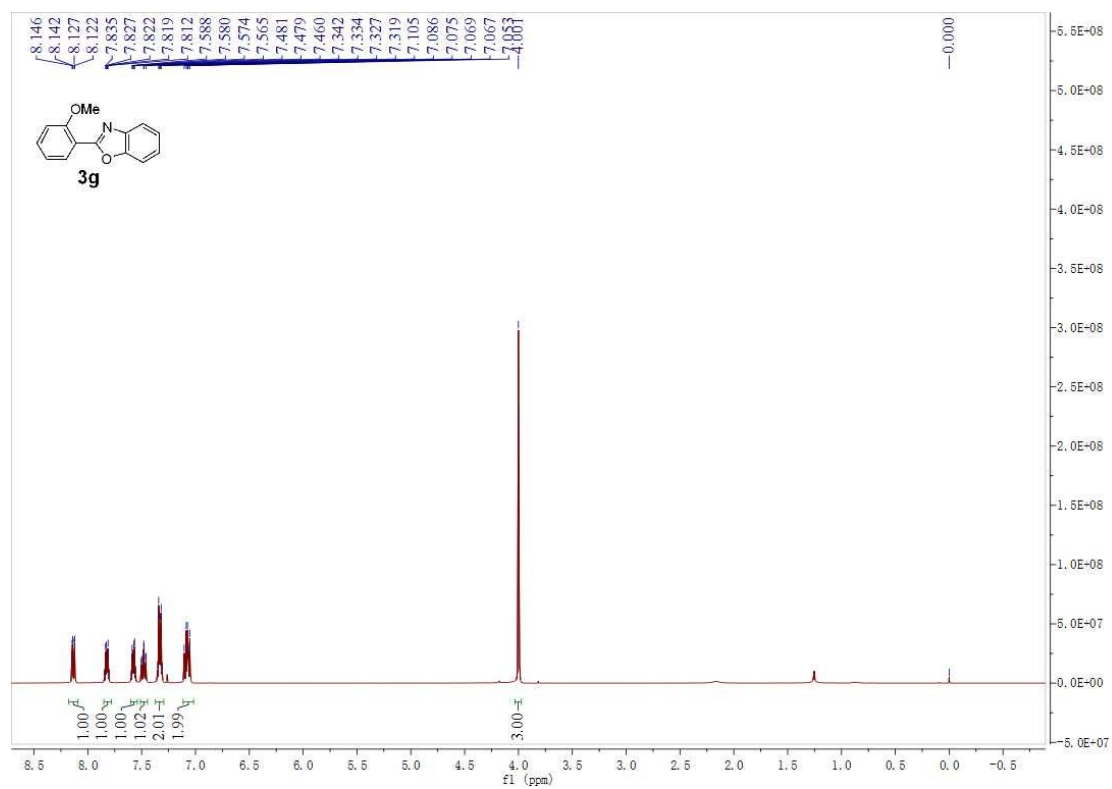

<sup>13</sup>C NMR (100 MHz, CDCl<sub>3</sub>)

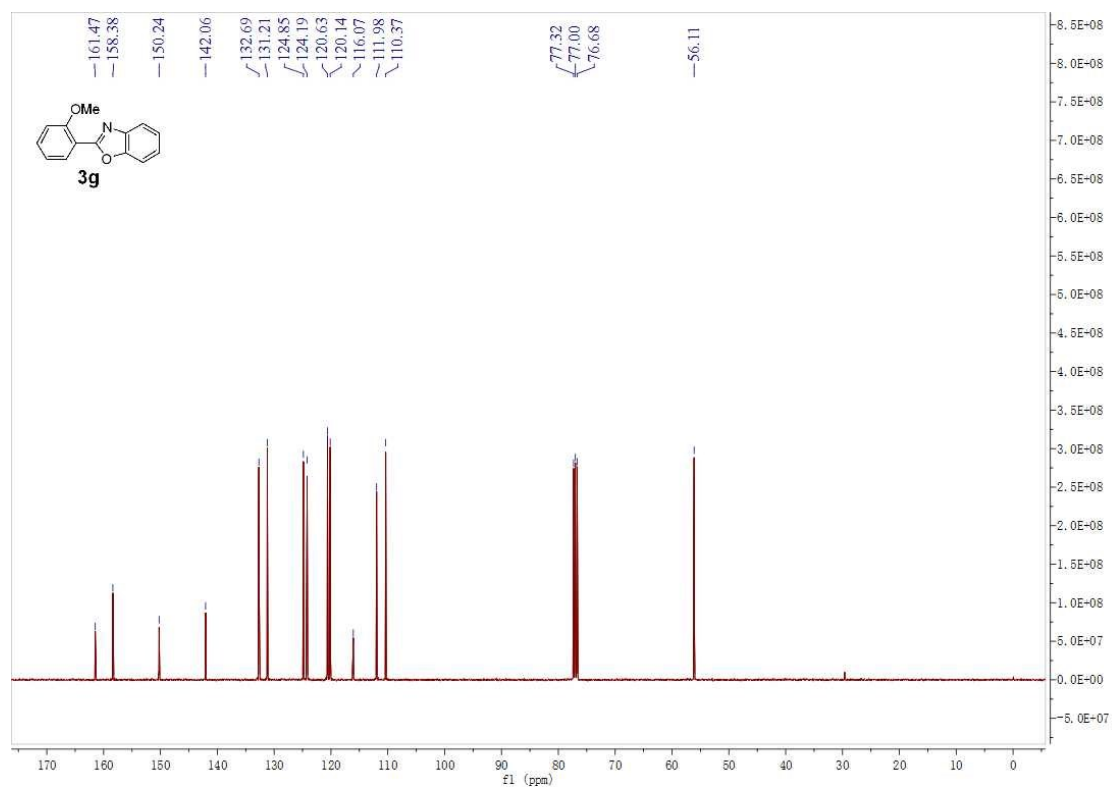

<sup>1</sup>H NMR (400 MHz, CDCl<sub>3</sub>)

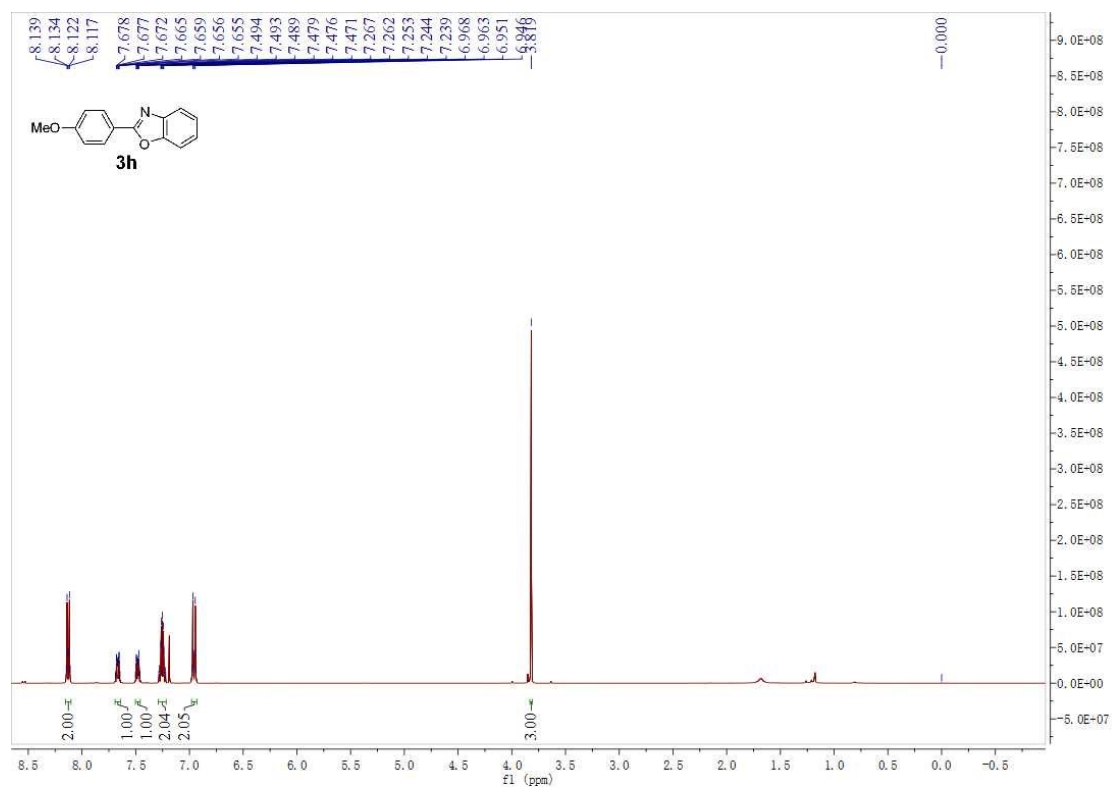

<sup>13</sup>C NMR (100 MHz, CDCl<sub>3</sub>)

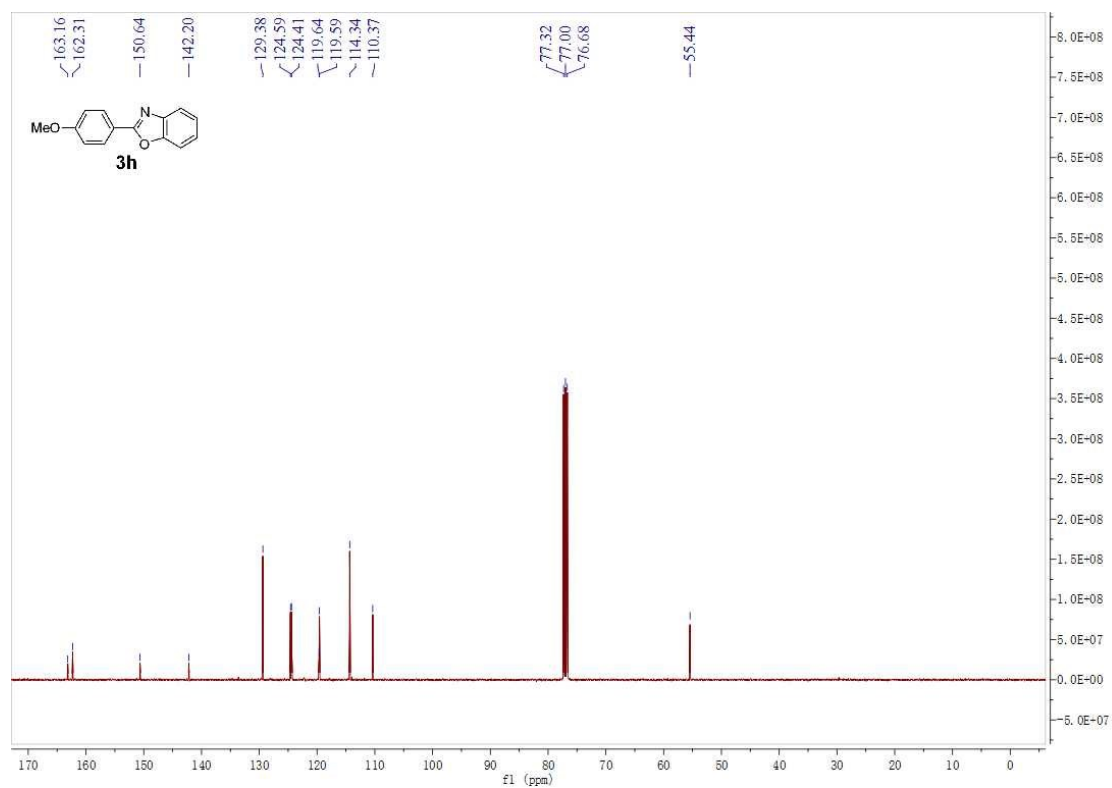

<sup>1</sup>H NMR (400 MHz, CDCl<sub>3</sub>)

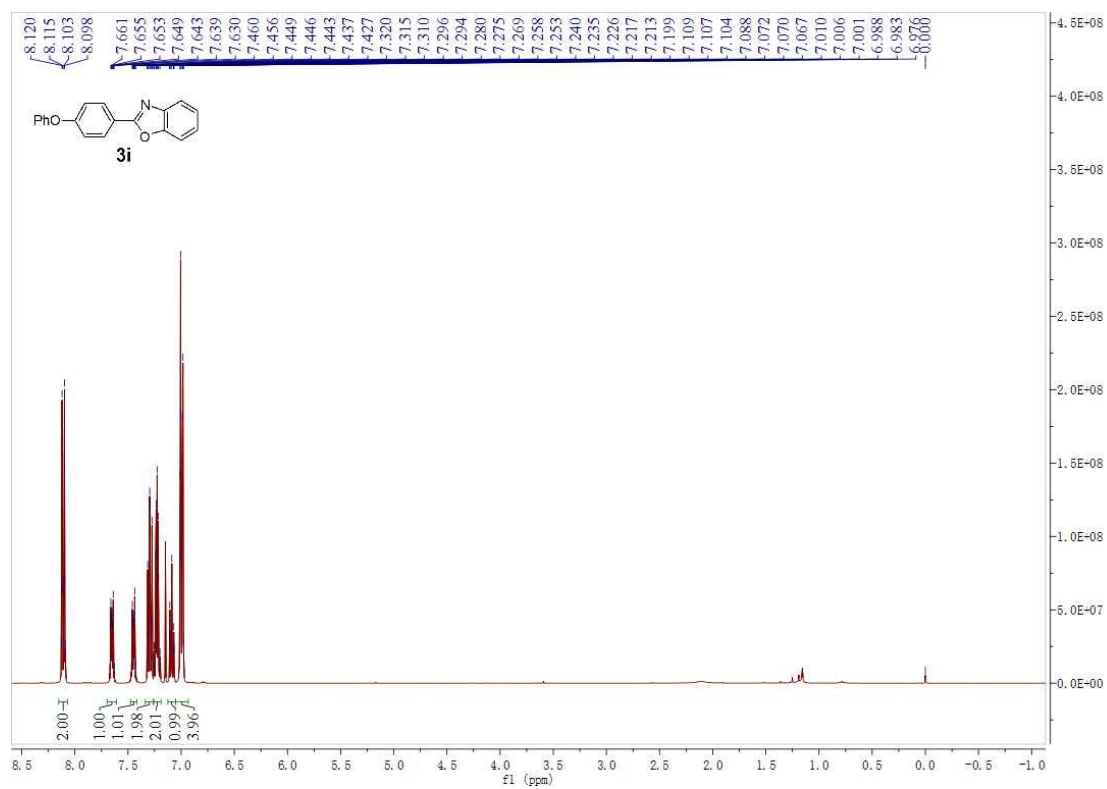

<sup>13</sup>C NMR (100 MHz, CDCl<sub>3</sub>)

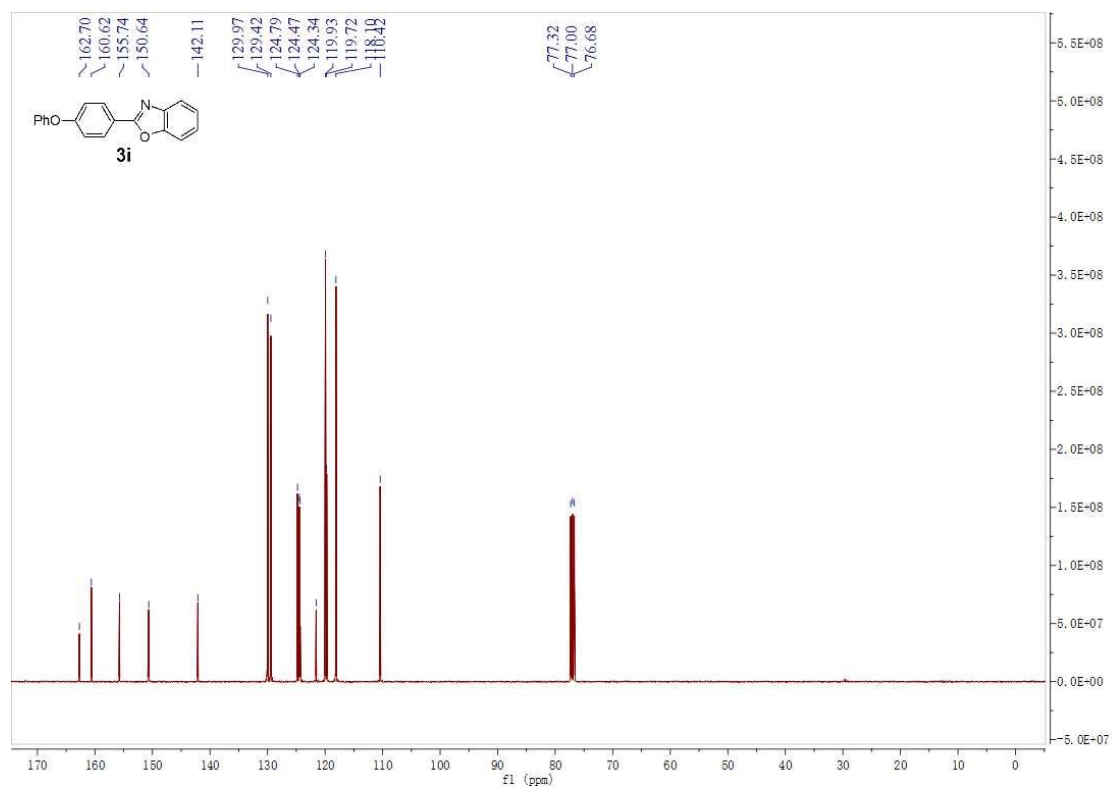



<sup>1</sup>H NMR (400 MHz, CDCl<sub>3</sub>)

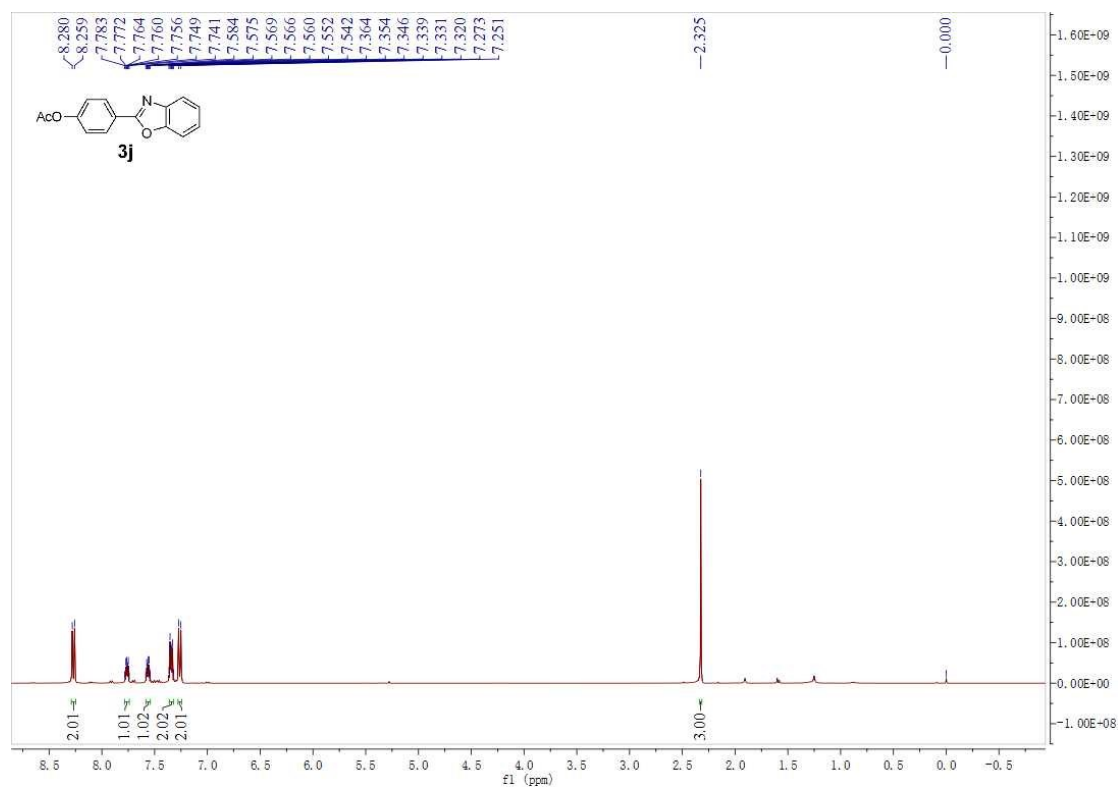

<sup>13</sup>C NMR (100 MHz, CDCl<sub>3</sub>)

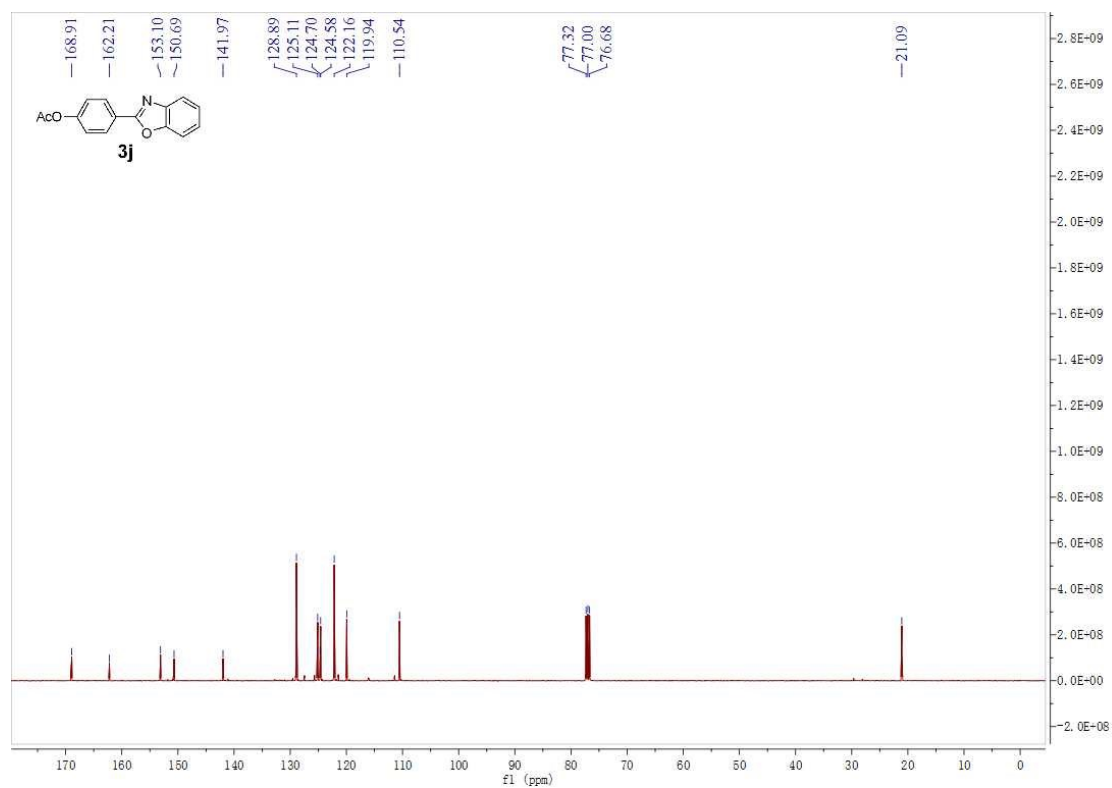

<sup>1</sup>H NMR (400 MHz, CDCl<sub>3</sub>)

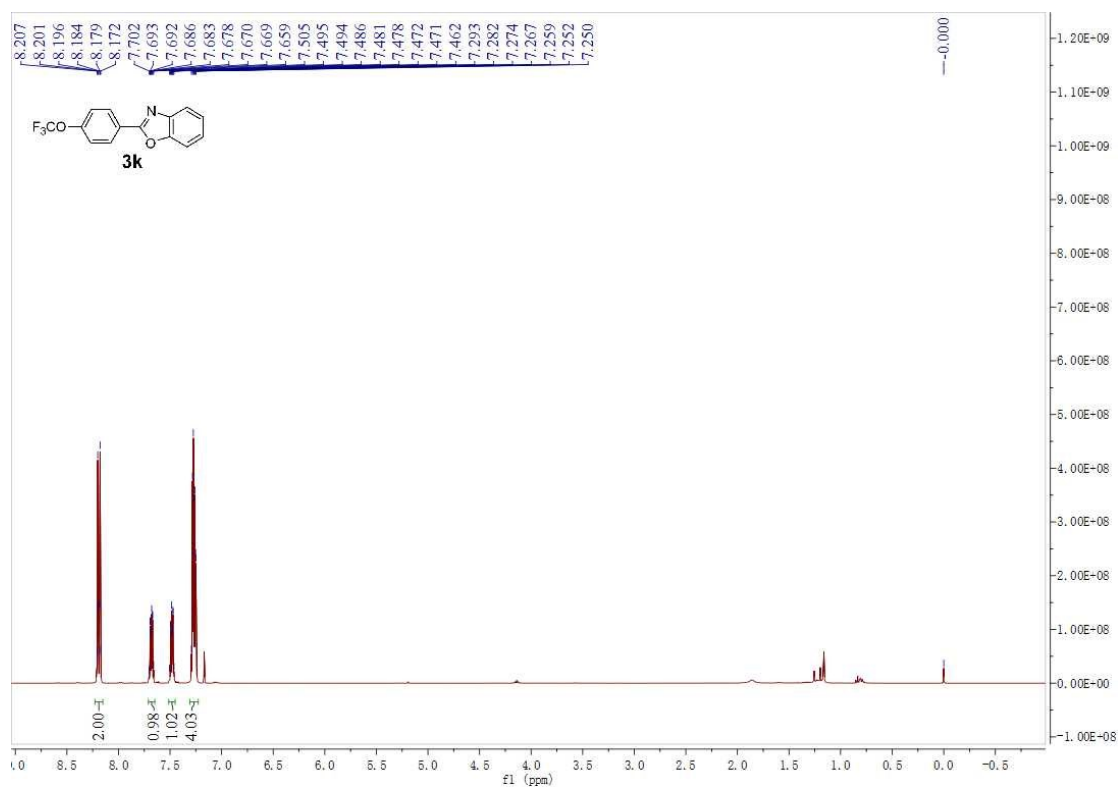

<sup>13</sup>C NMR (100 MHz, CDCl<sub>3</sub>)

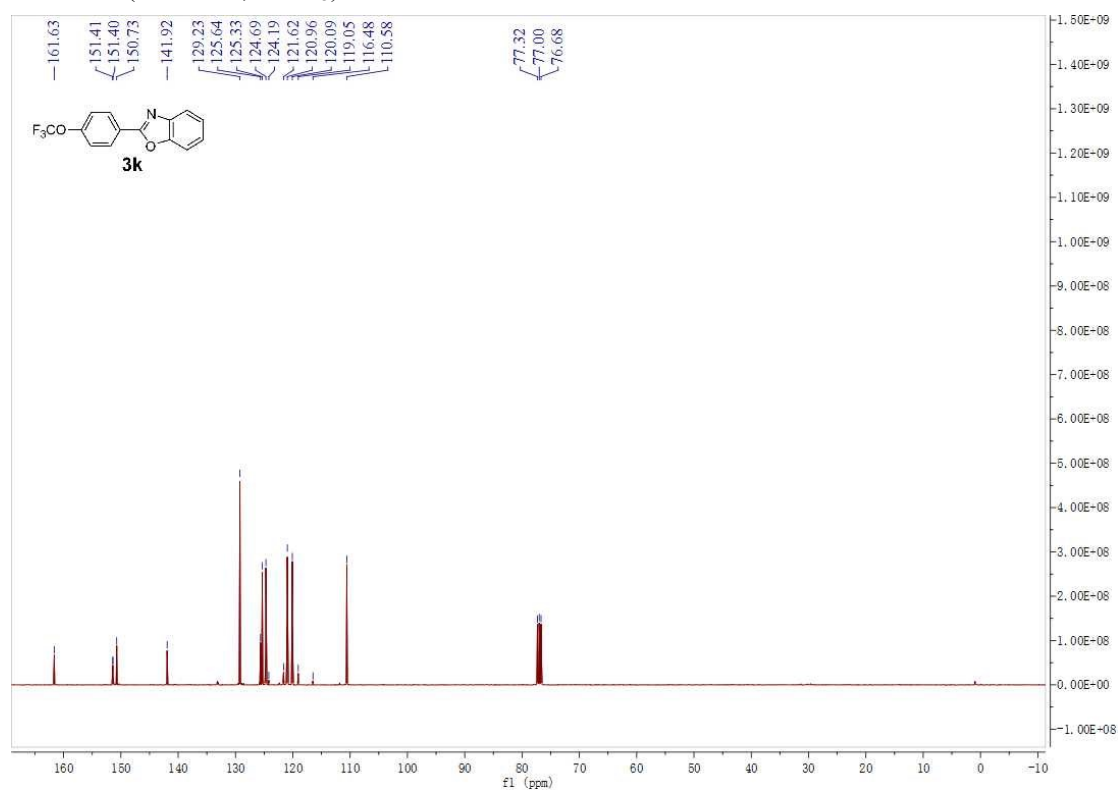

$^{19}\text{F}$  NMR (376 MHz,  $\text{CDCl}_3$ )

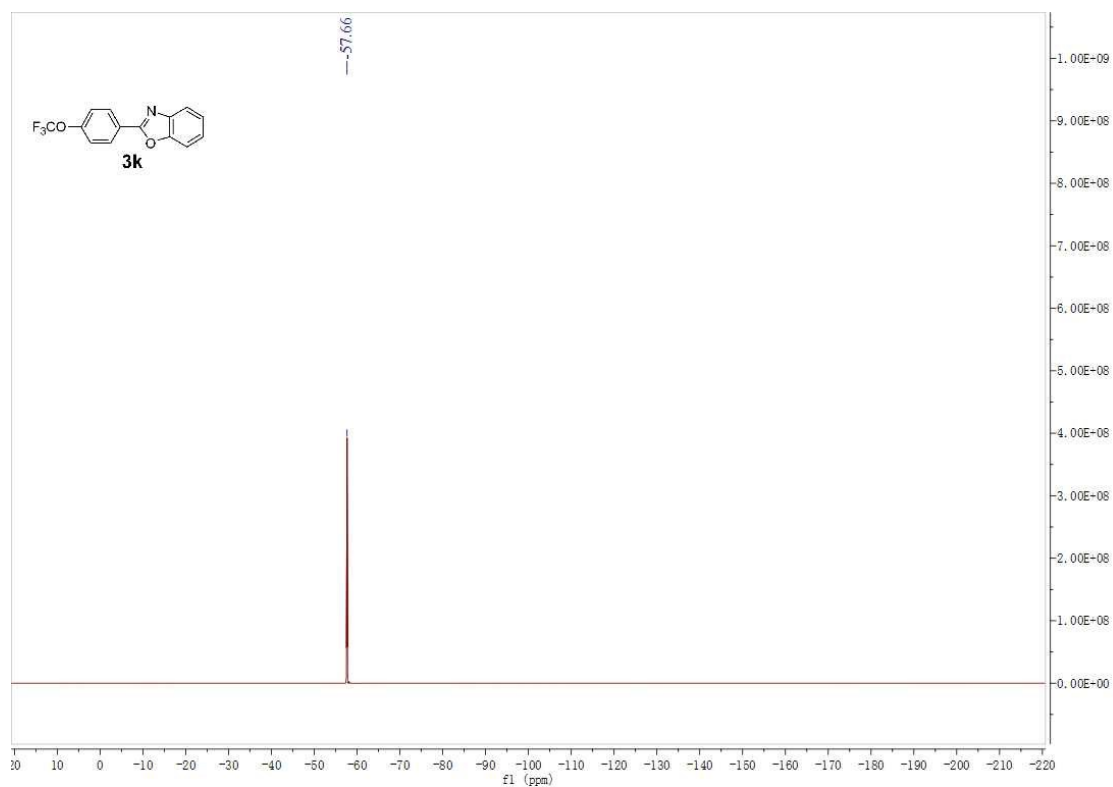

$^1\text{H}$  NMR (400 MHz,  $\text{CDCl}_3$ )

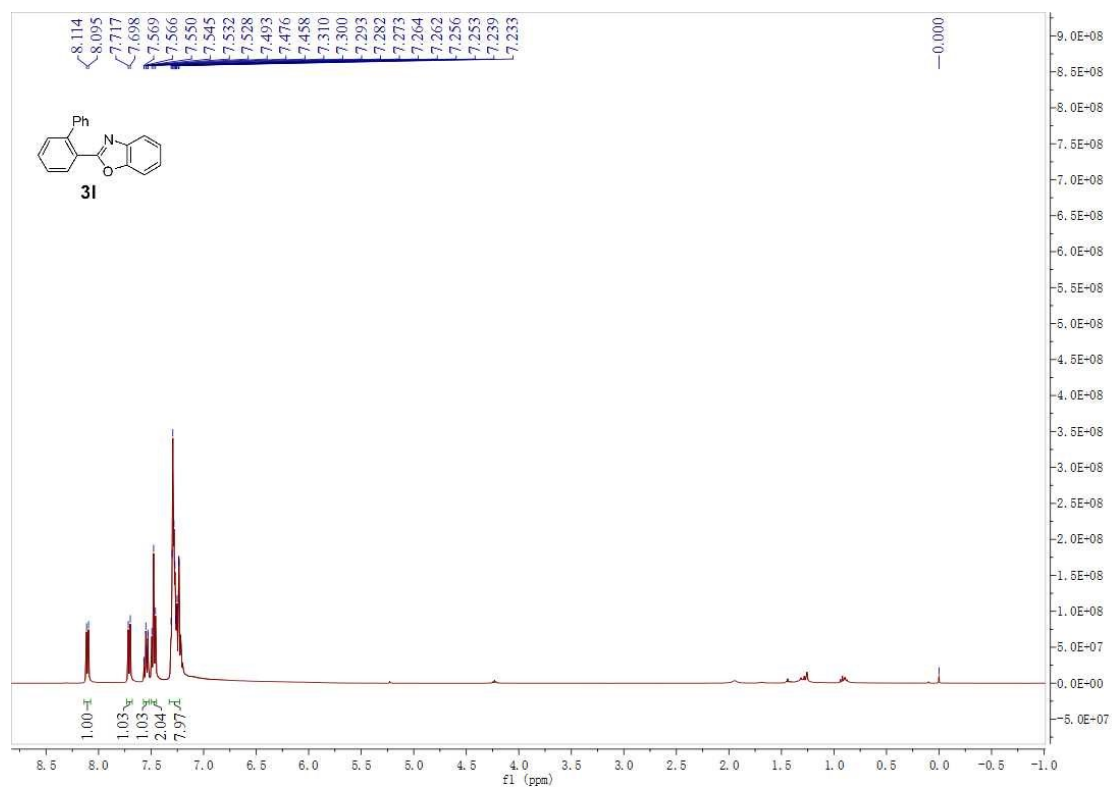

<sup>13</sup>C NMR (100 MHz, CDCl<sub>3</sub>)

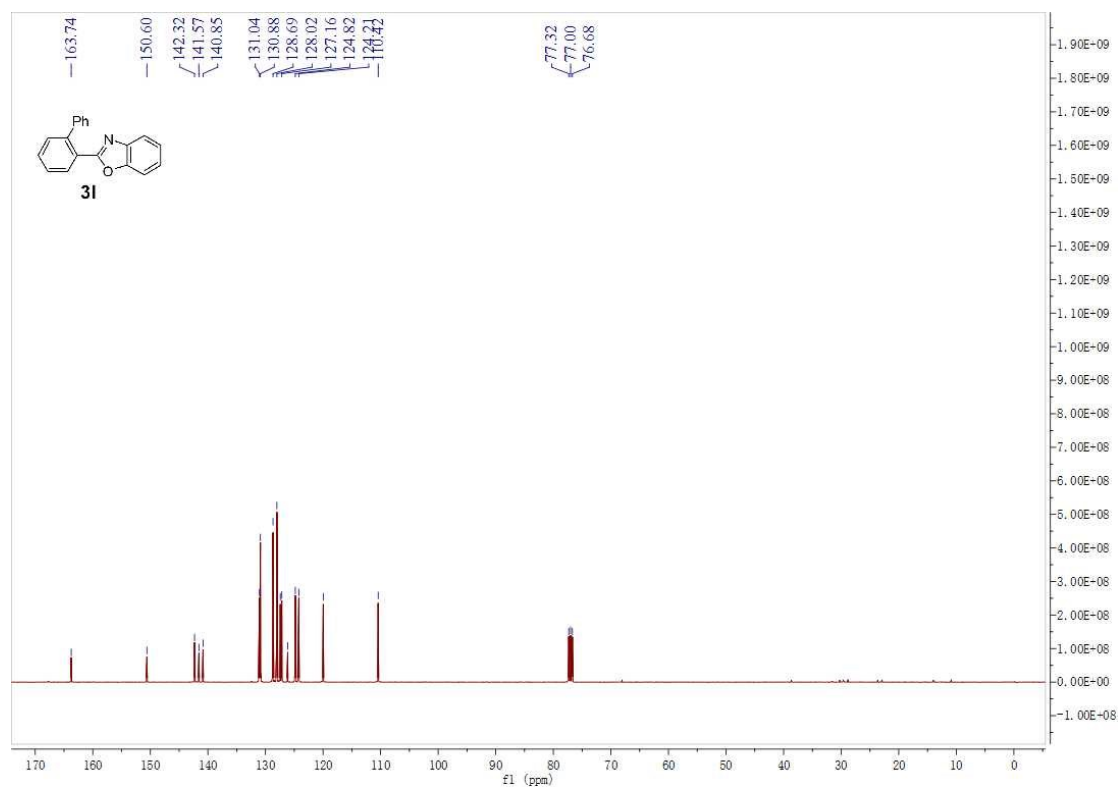

<sup>1</sup>H NMR (400 MHz, CDCl<sub>3</sub>)

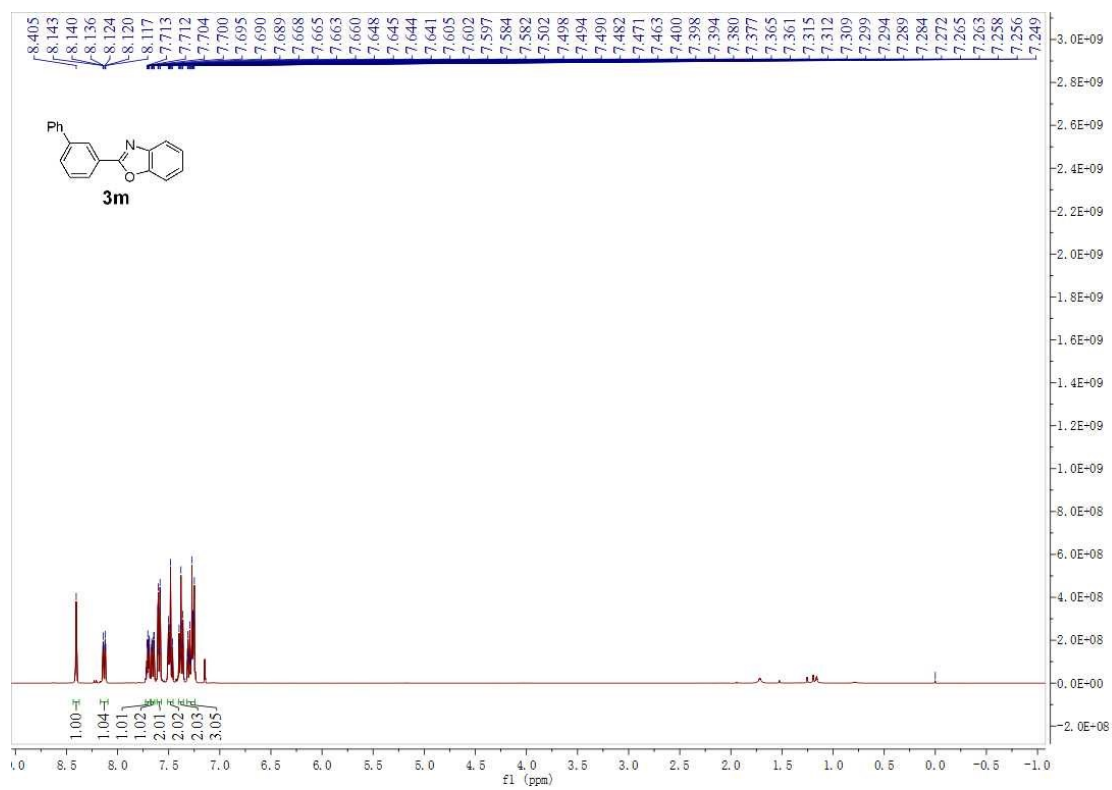

<sup>13</sup>C NMR (100 MHz, CDCl<sub>3</sub>)

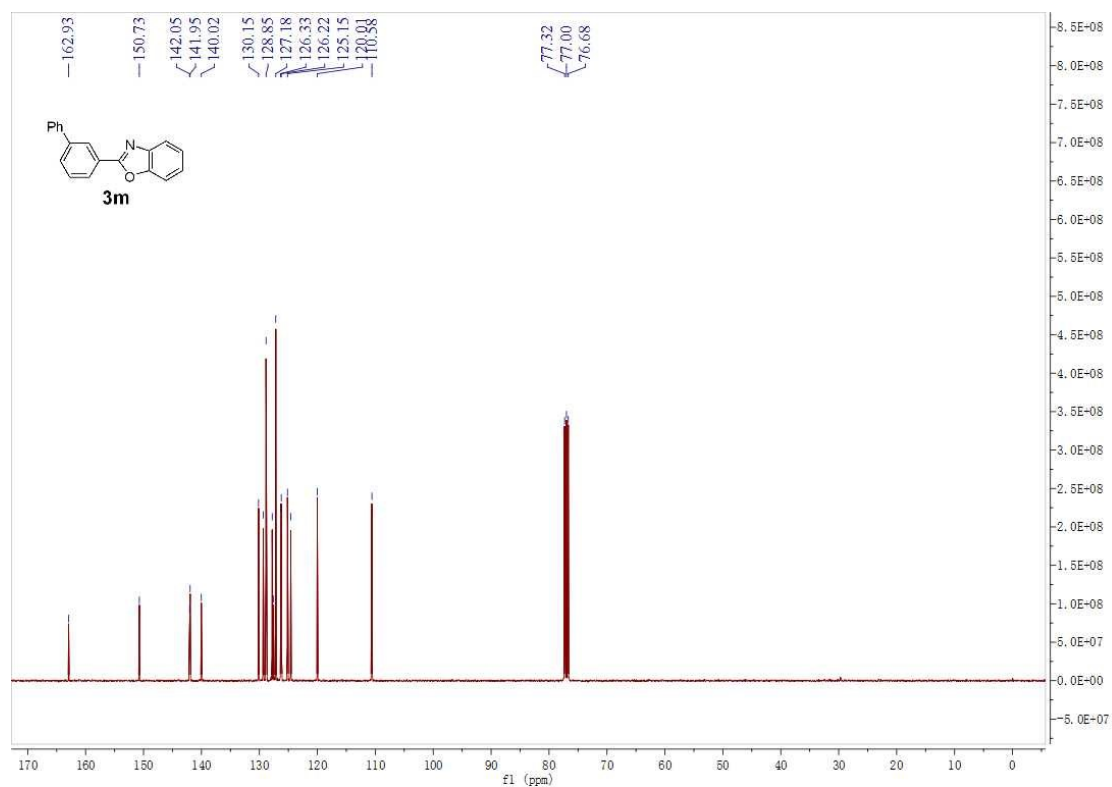

<sup>1</sup>H NMR (400 MHz, CDCl<sub>3</sub>)

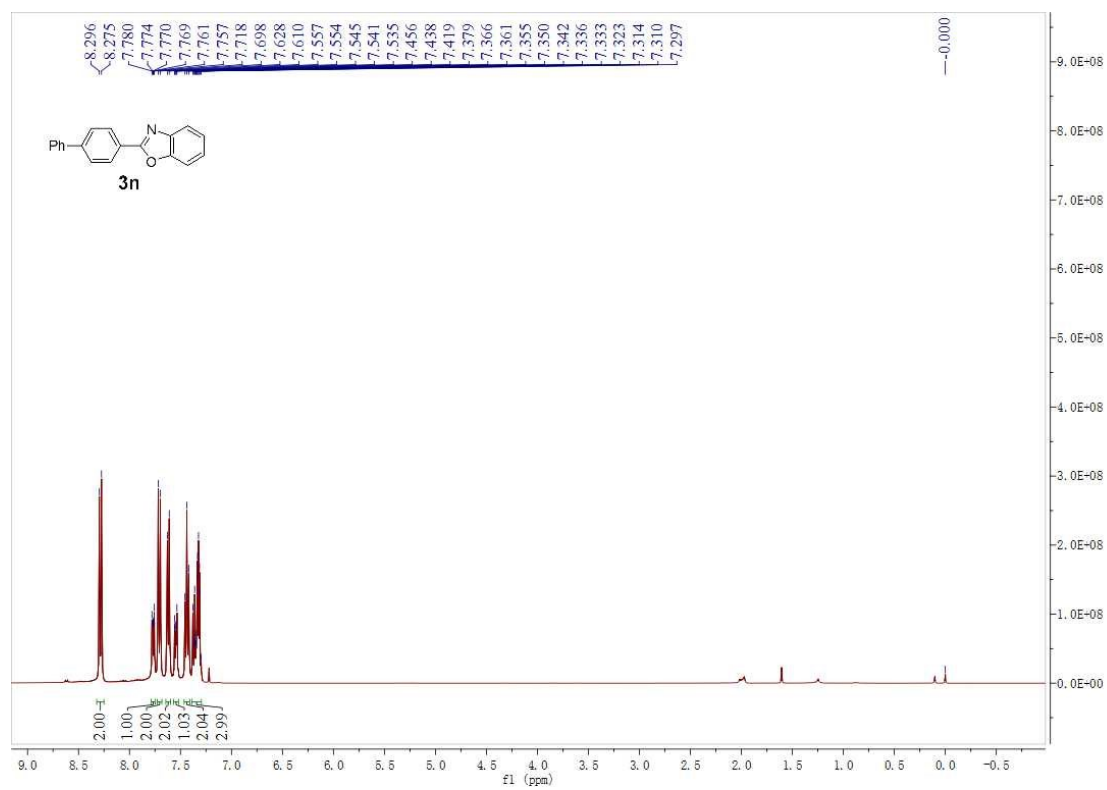

$^{13}\text{C}$  NMR (100 MHz,  $\text{CDCl}_3$ )

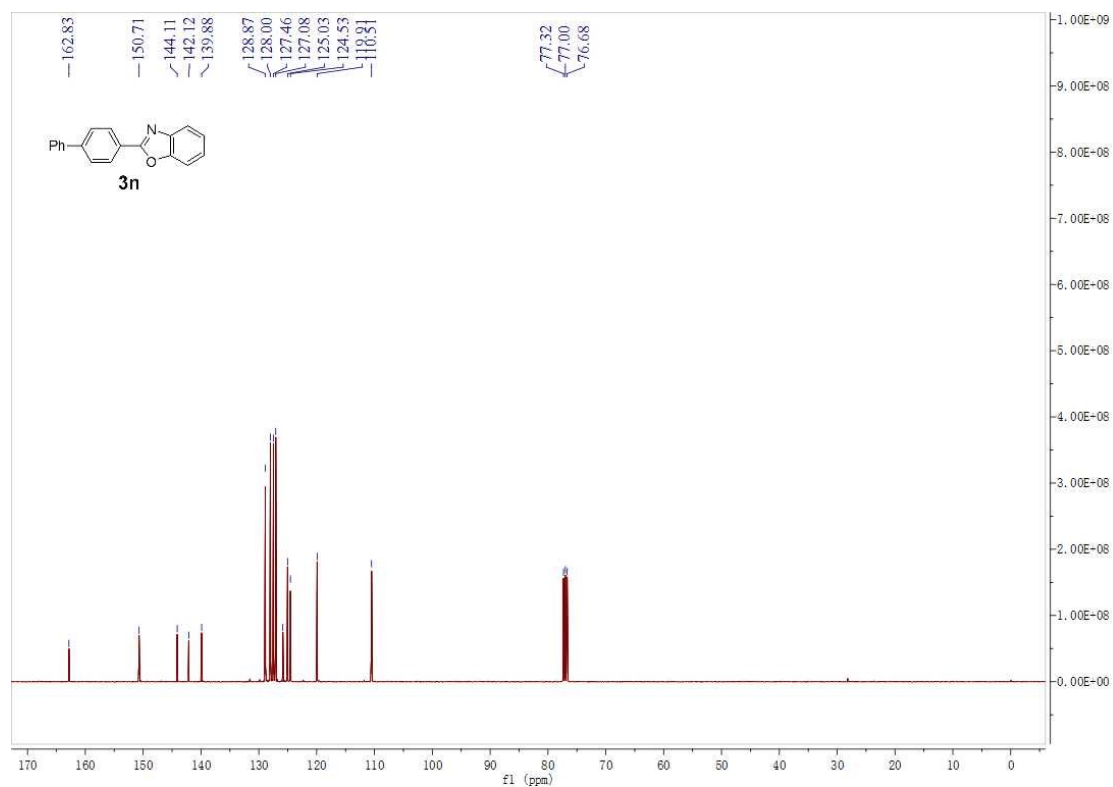

$^1\text{H}$  NMR (400 MHz,  $\text{CDCl}_3$ )

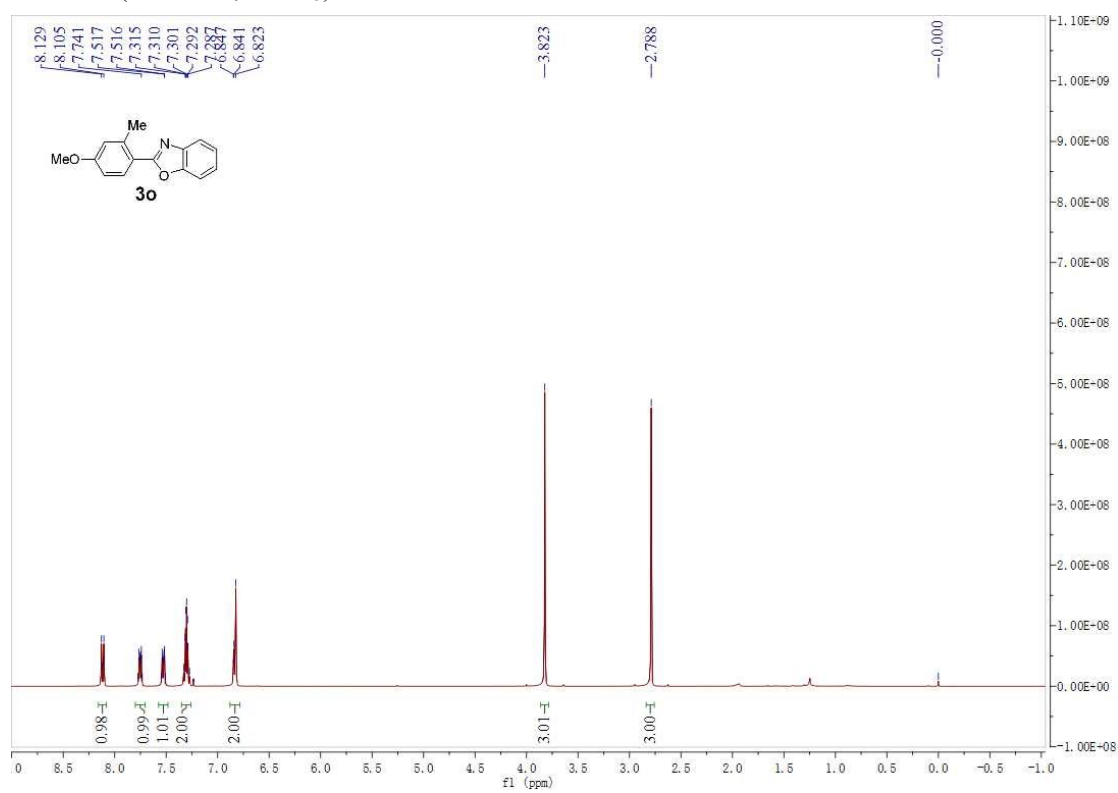

<sup>13</sup>C NMR (100 MHz, CDCl<sub>3</sub>)

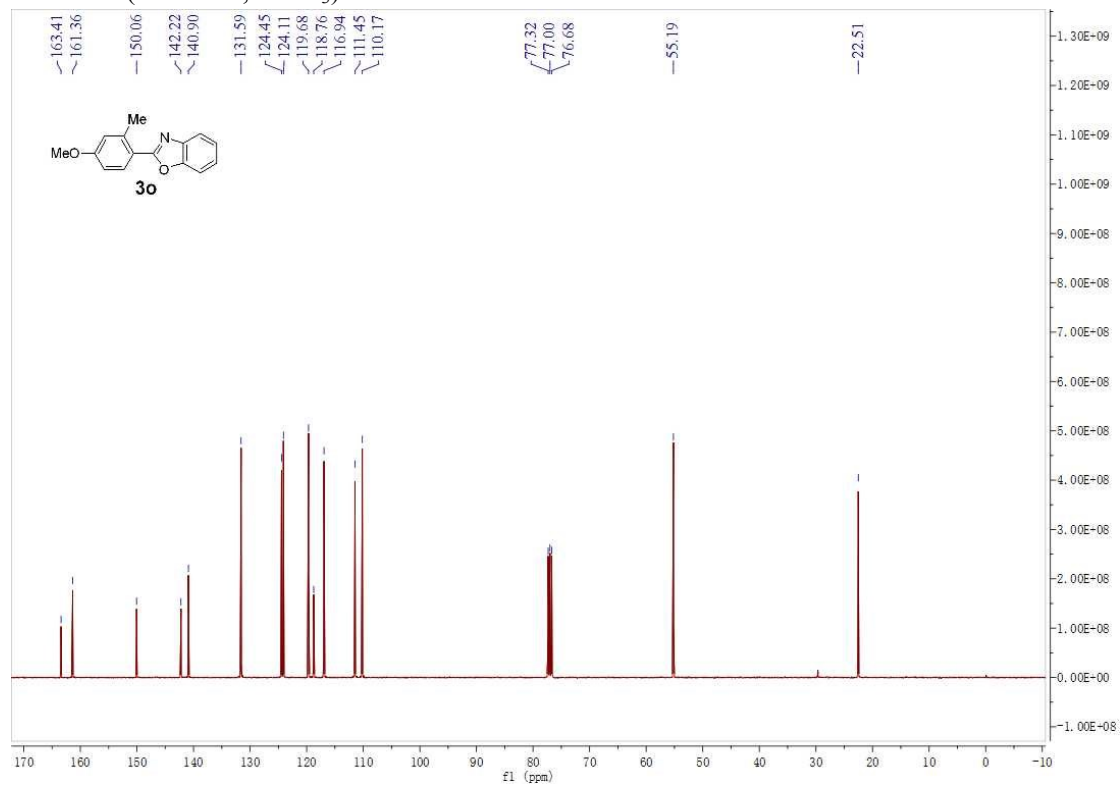

<sup>1</sup>H NMR (400 MHz, CDCl<sub>3</sub>)

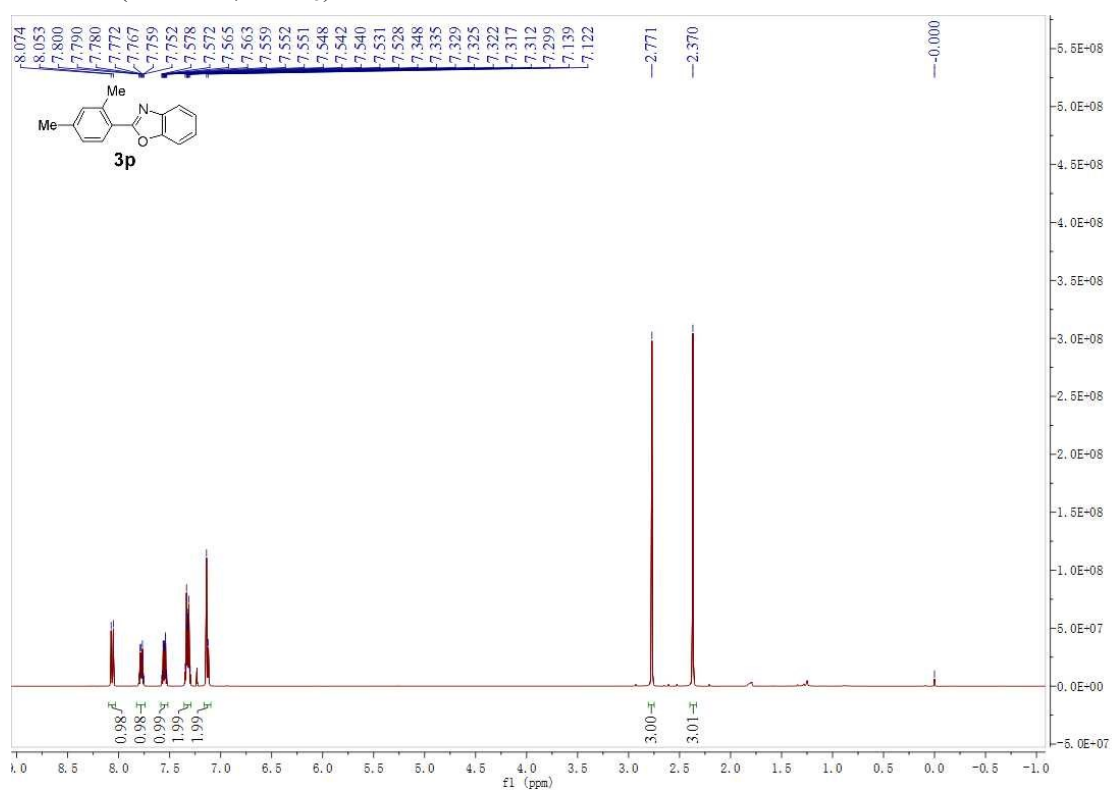

<sup>13</sup>C NMR (100 MHz, CDCl<sub>3</sub>)

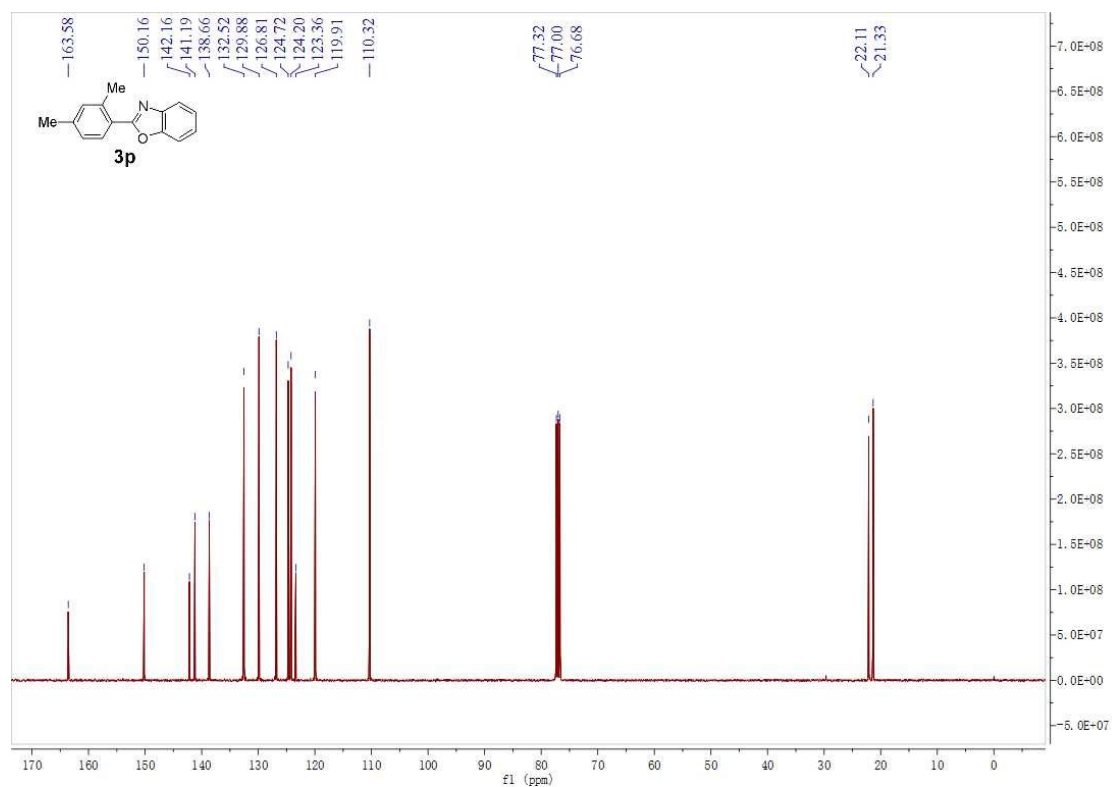

<sup>1</sup>H NMR (400 MHz, CDCl<sub>3</sub>)

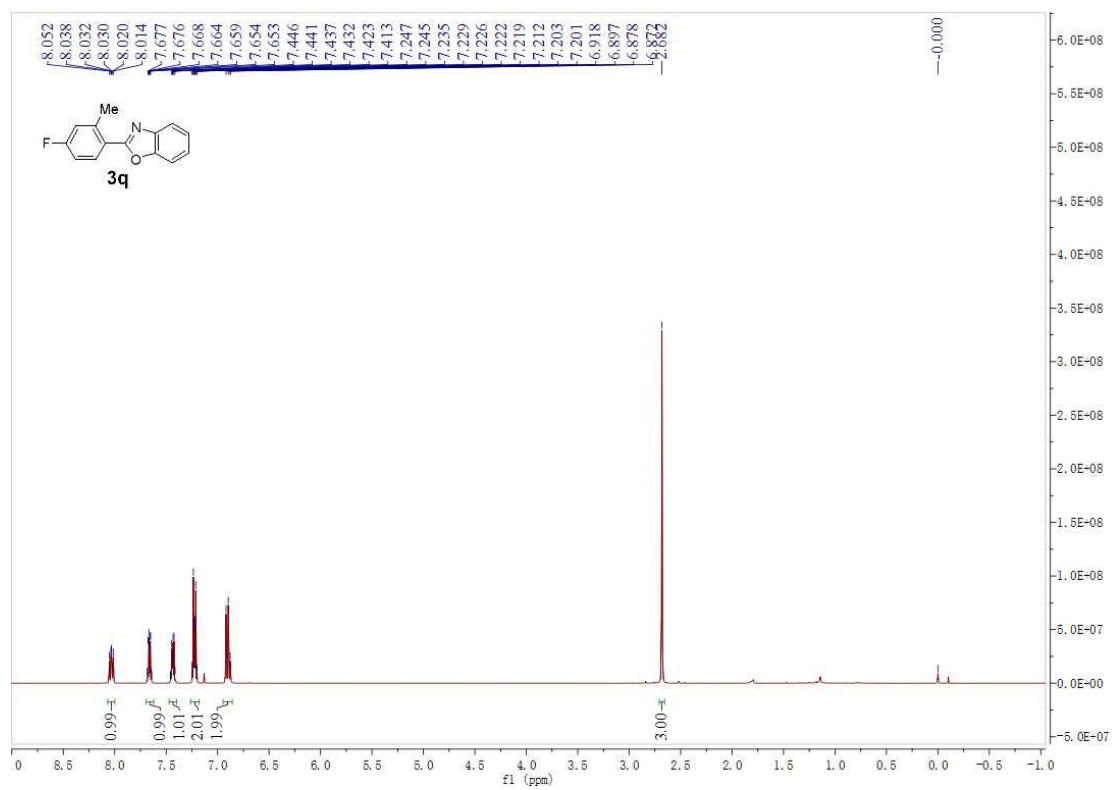



<sup>13</sup>C NMR (100 MHz, CDCl<sub>3</sub>)

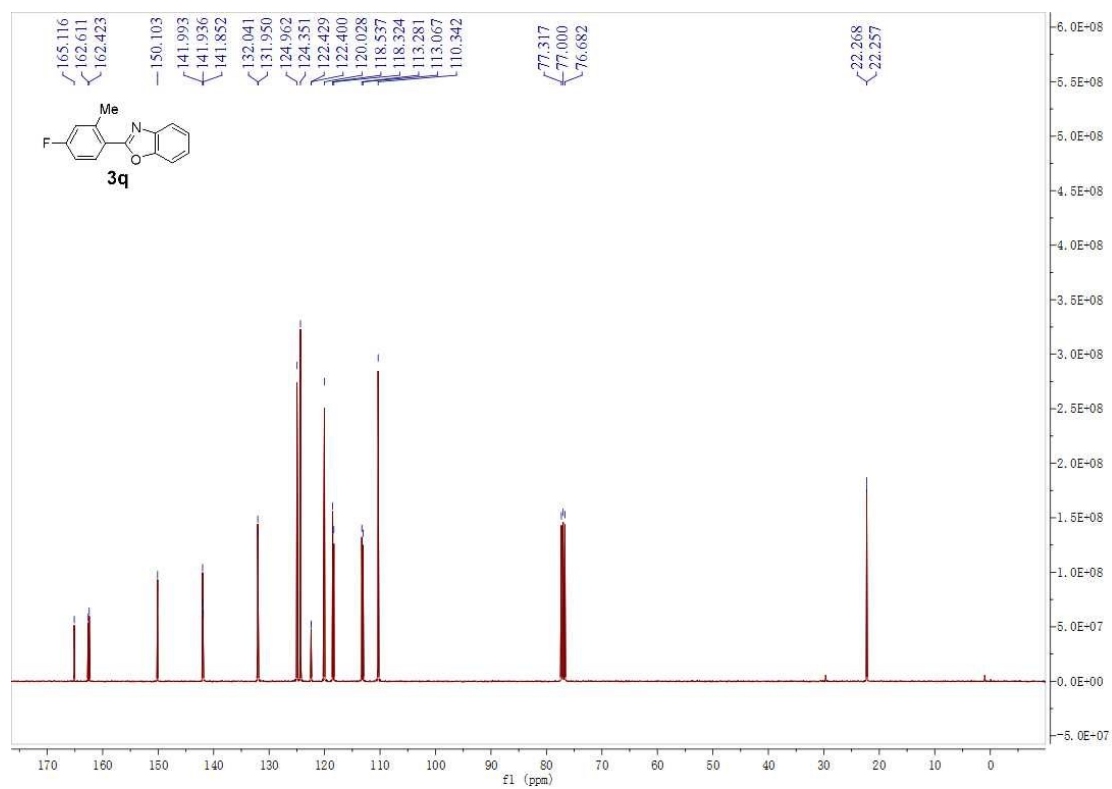

<sup>19</sup>F NMR (376 MHz, CDCl<sub>3</sub>)

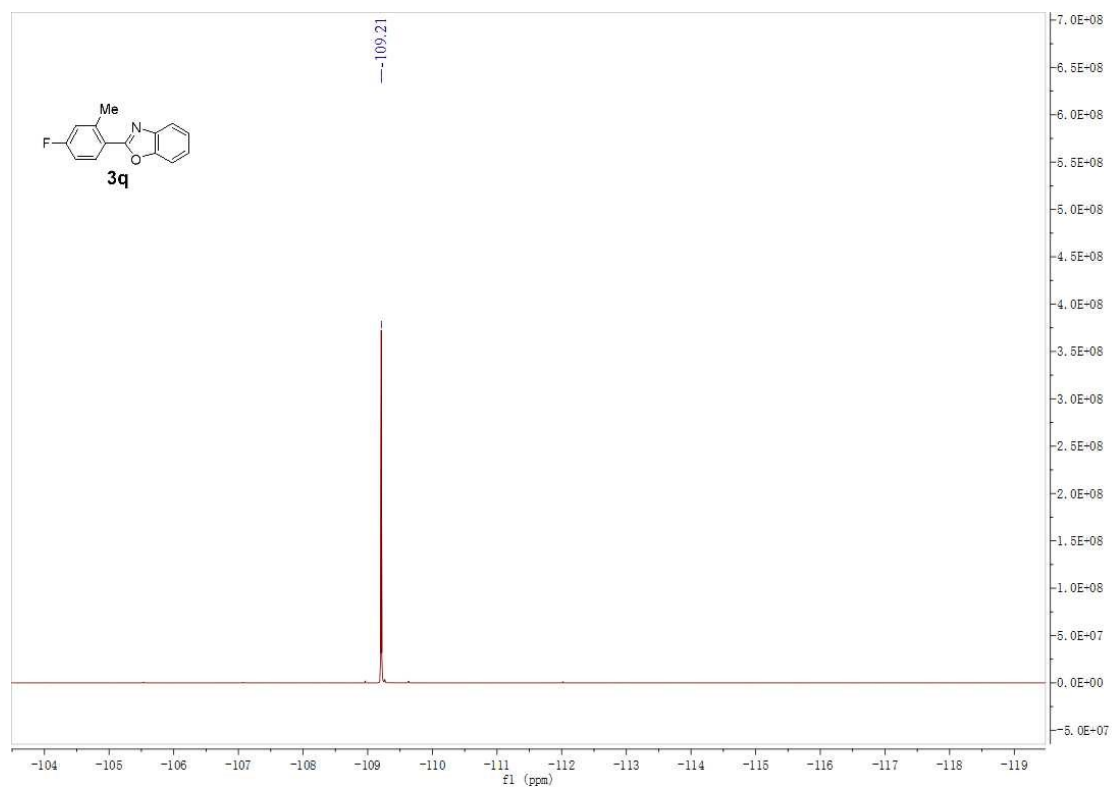

<sup>1</sup>H NMR (400 MHz, CDCl<sub>3</sub>)

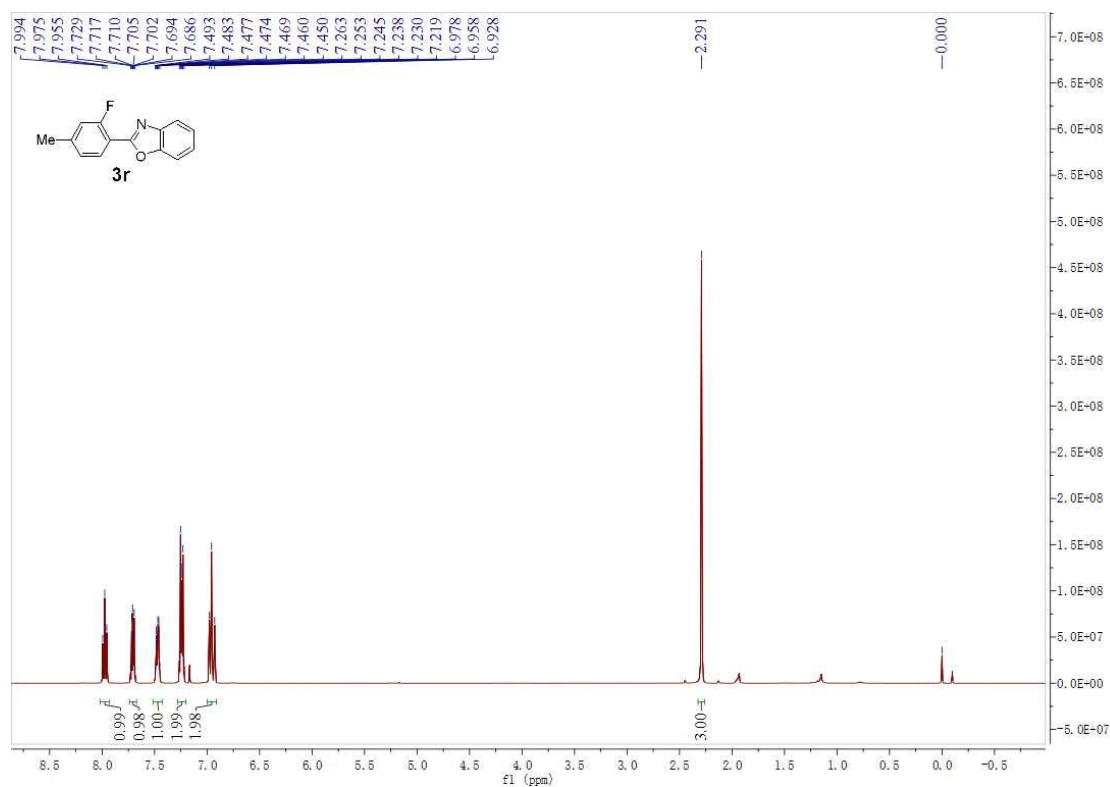

<sup>13</sup>C NMR (100 MHz, CDCl<sub>3</sub>)

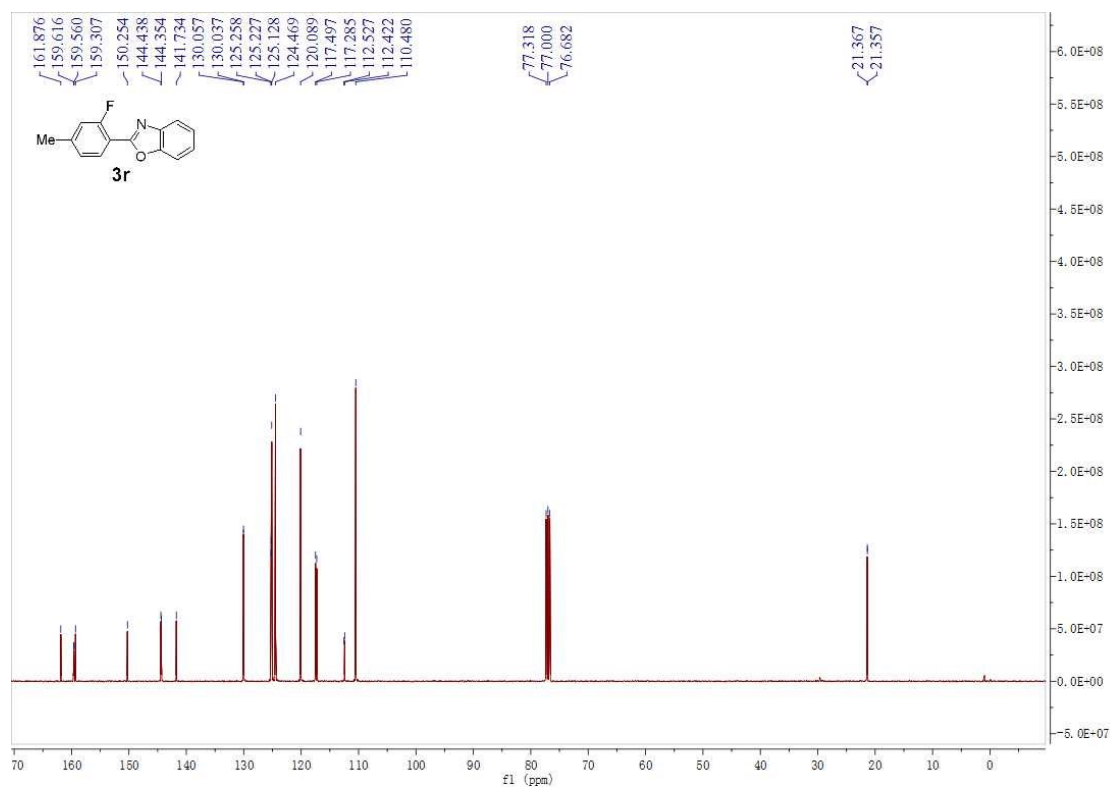

$^{19}\text{F}$  NMR (376 MHz,  $\text{CDCl}_3$ )

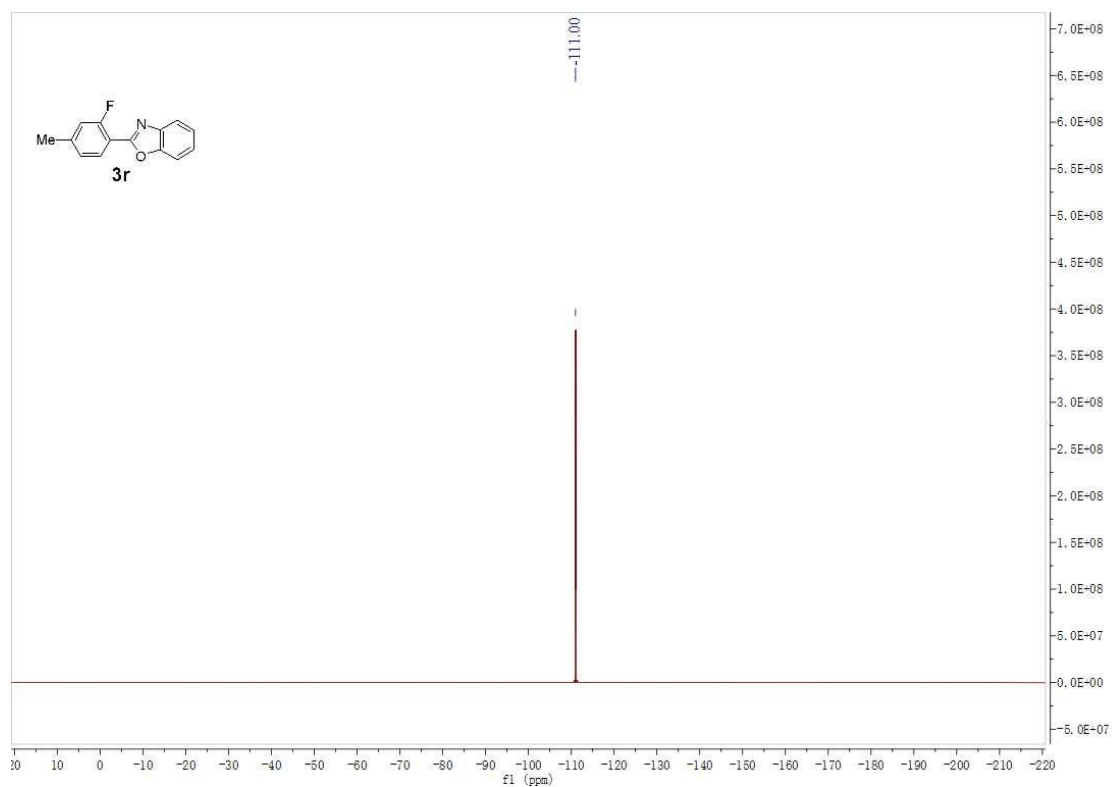

$^1\text{H}$  NMR (400 MHz,  $\text{CDCl}_3$ )

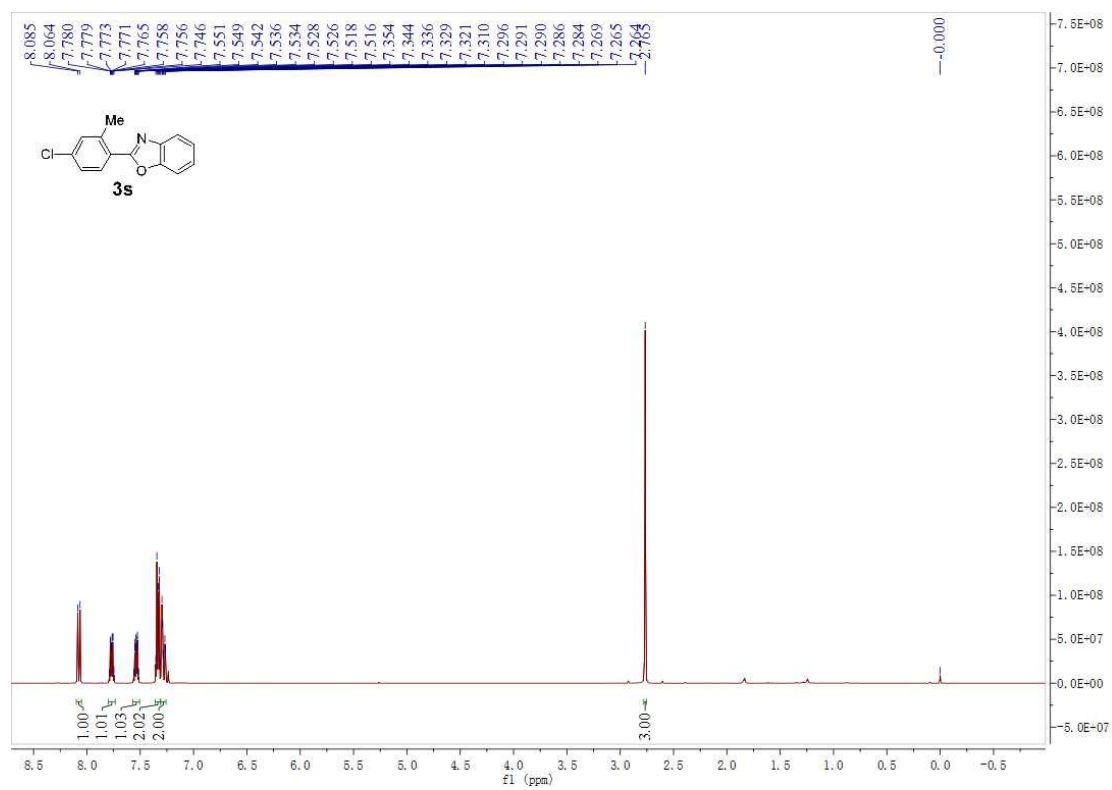

$^{13}\text{C}$  NMR (100 MHz,  $\text{CDCl}_3$ )

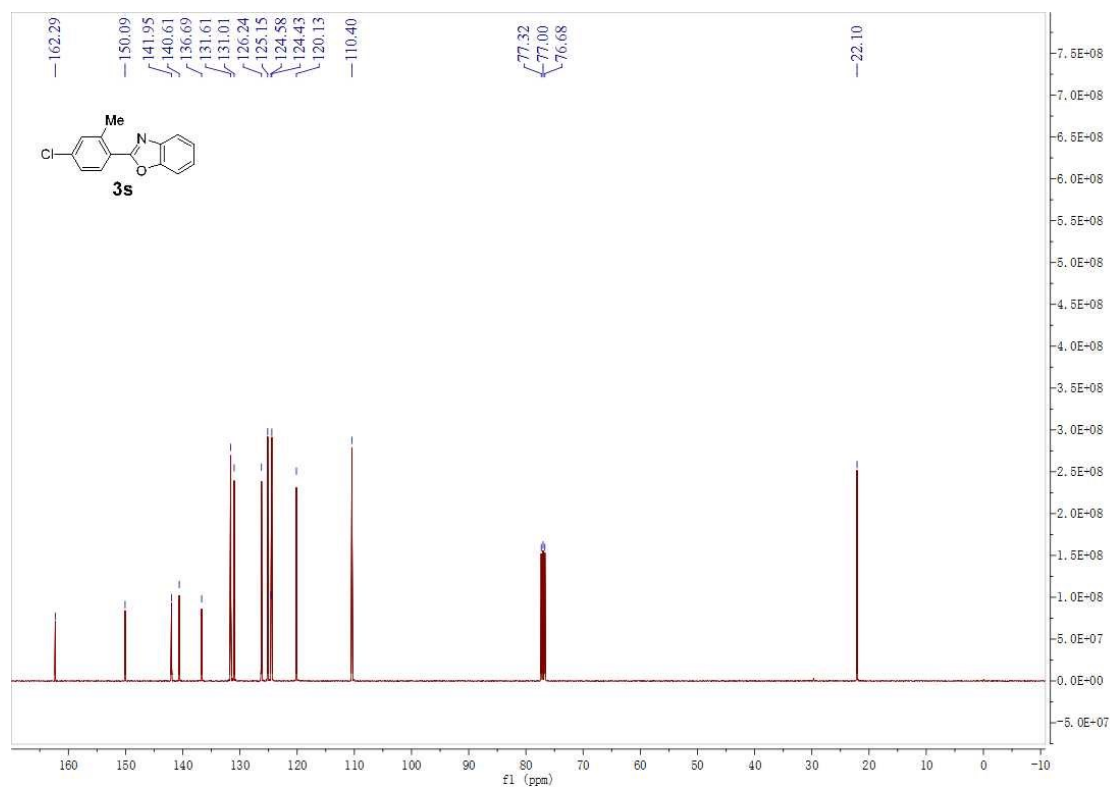

$^1\text{H}$  NMR (400 MHz,  $\text{CDCl}_3$ )

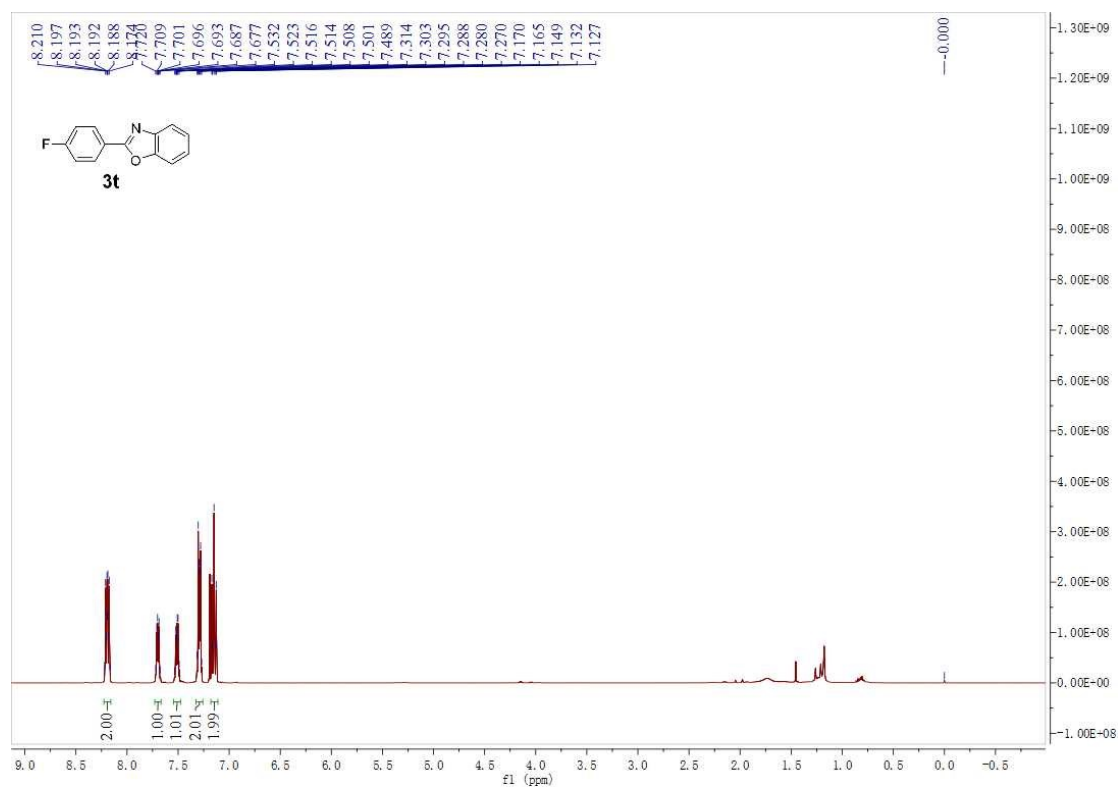

<sup>13</sup>C NMR (100 MHz, CDCl<sub>3</sub>)

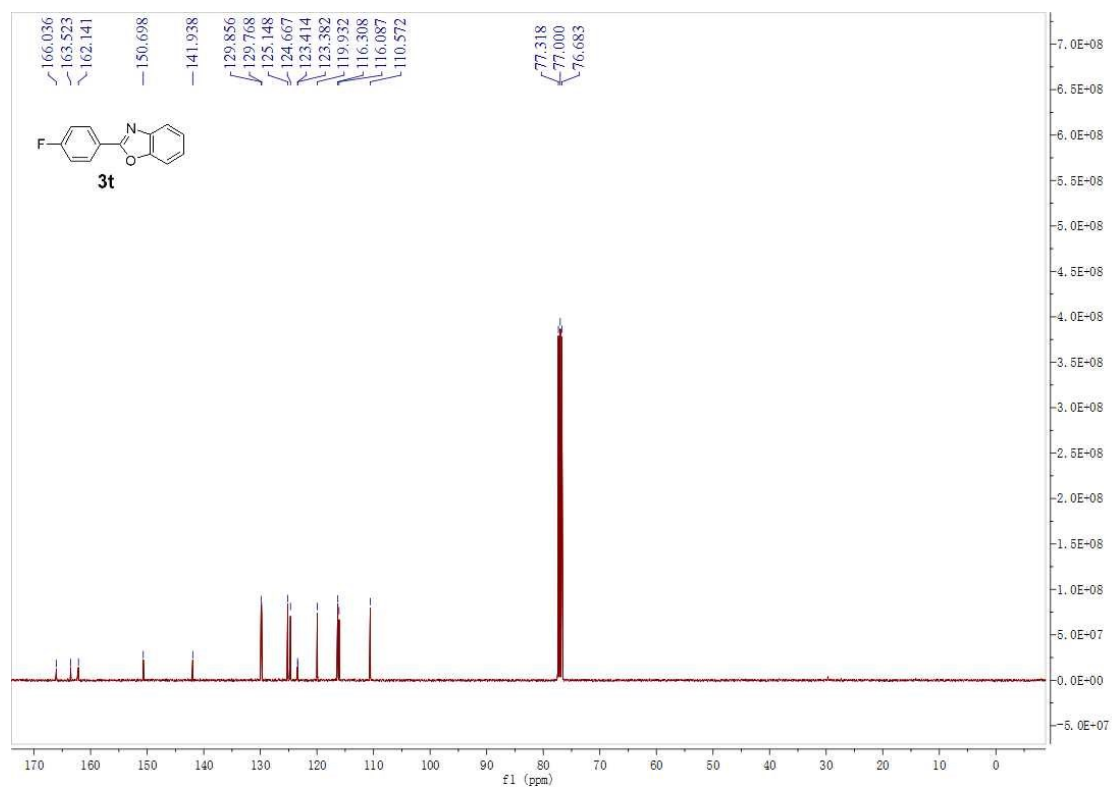

<sup>1</sup>H NMR (400 MHz, CDCl<sub>3</sub>)

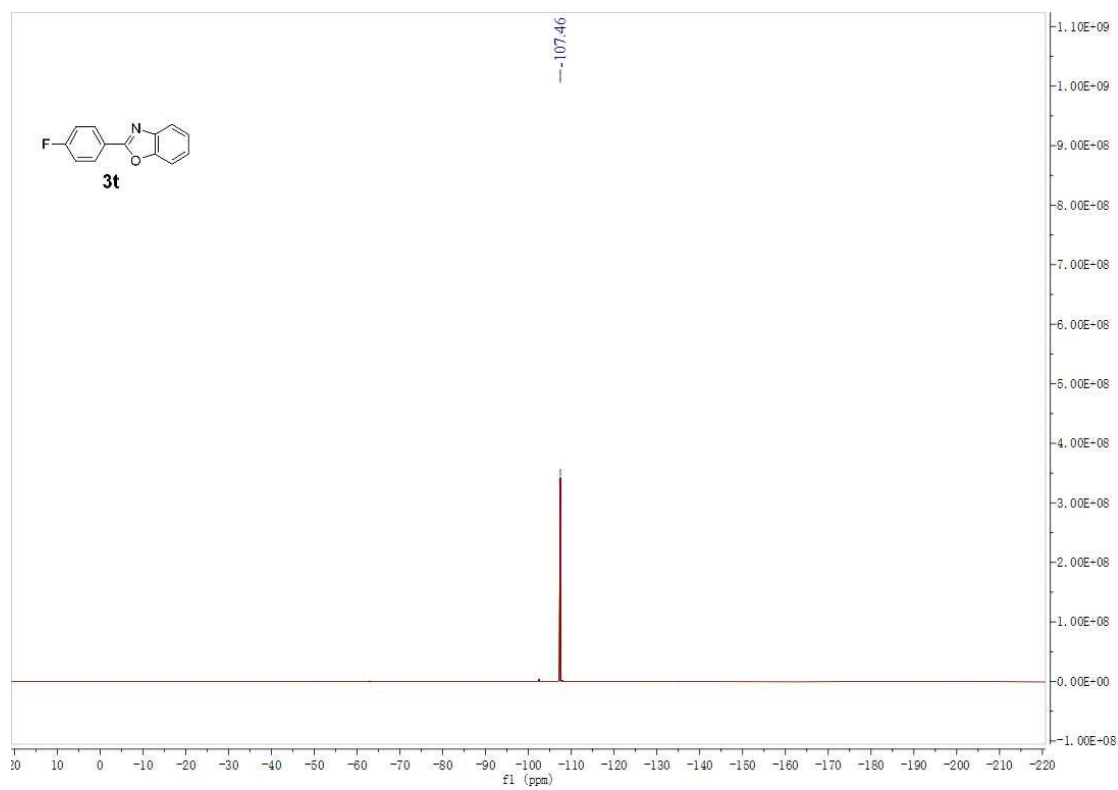

<sup>1</sup>H NMR (400 MHz, CDCl<sub>3</sub>)

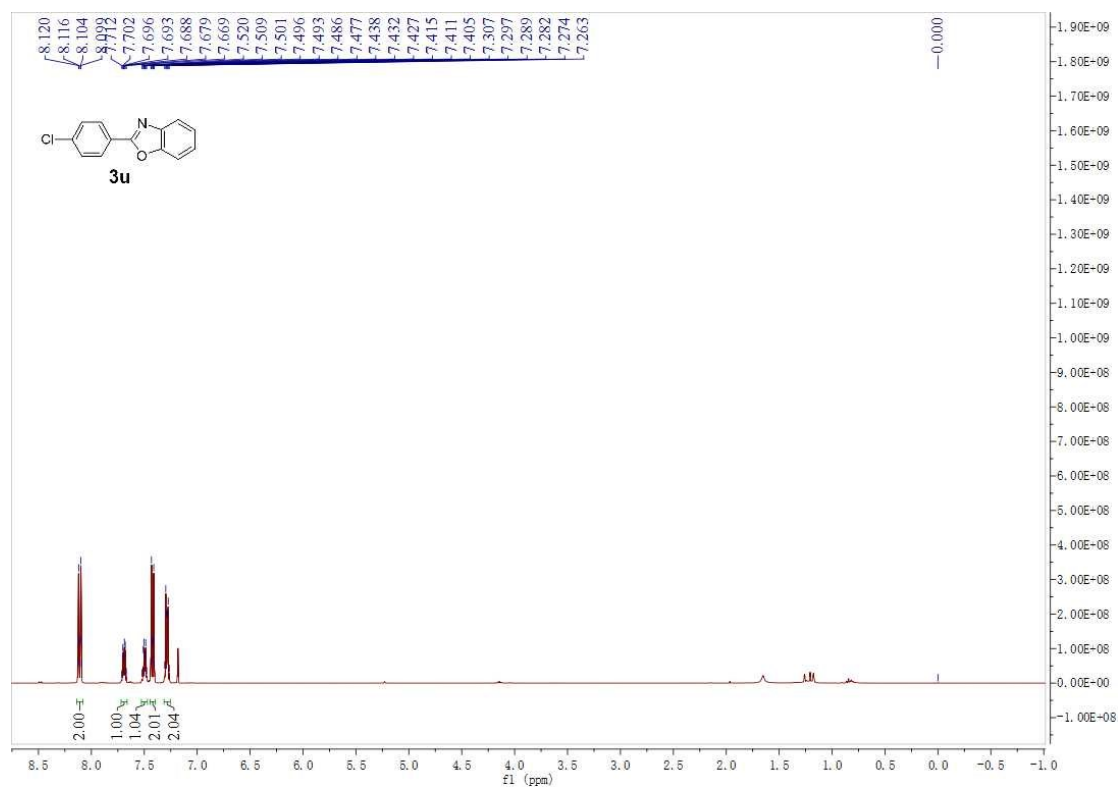

<sup>13</sup>C NMR (100 MHz, CDCl<sub>3</sub>)

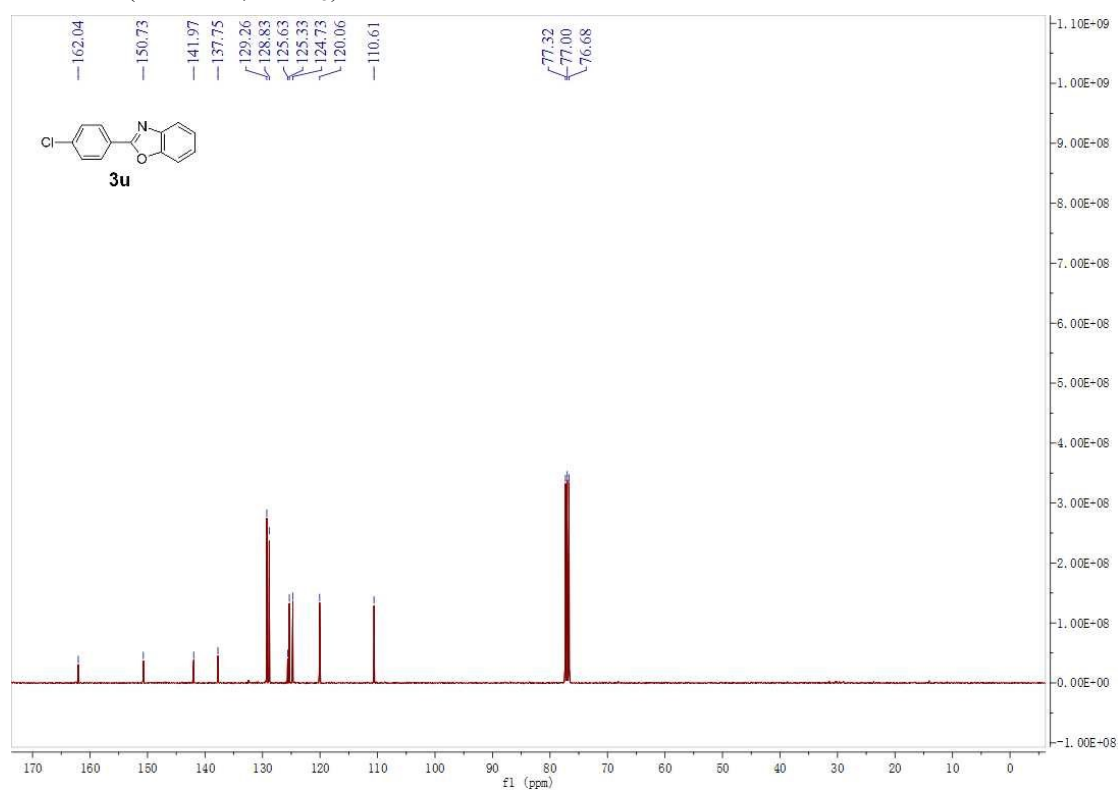

<sup>1</sup>H NMR (400 MHz, CDCl<sub>3</sub>)

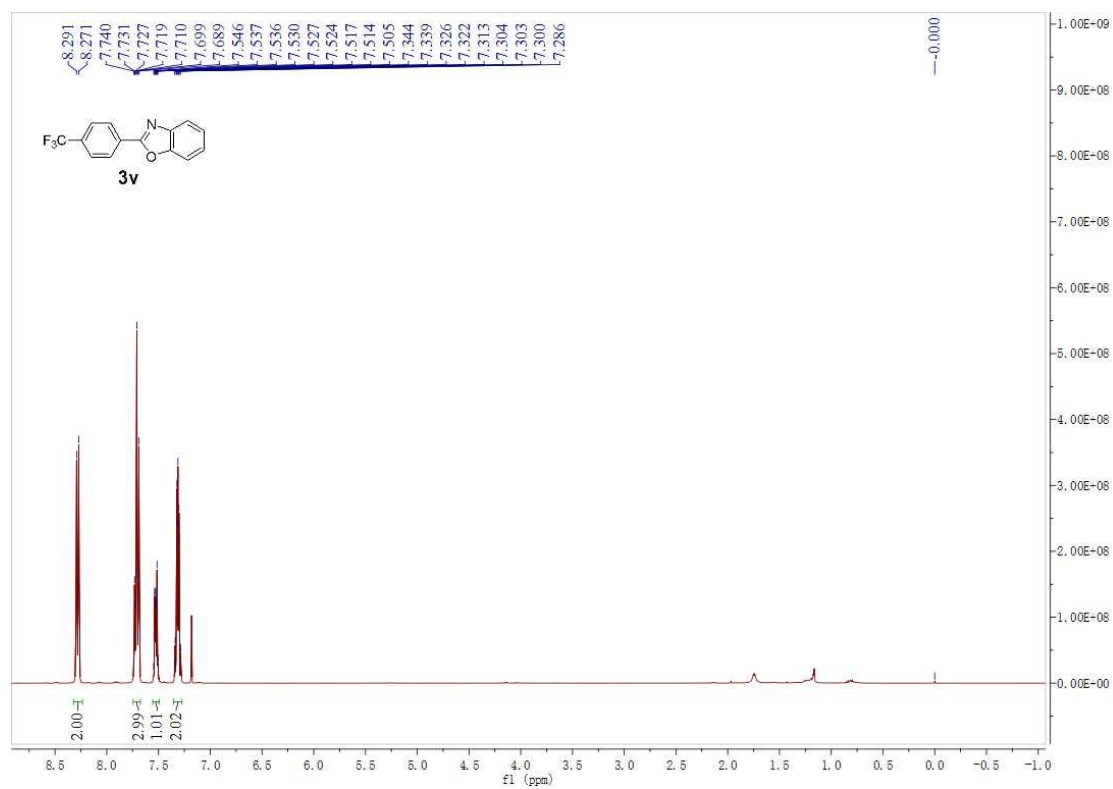

<sup>13</sup>C NMR (100 MHz, CDCl<sub>3</sub>)

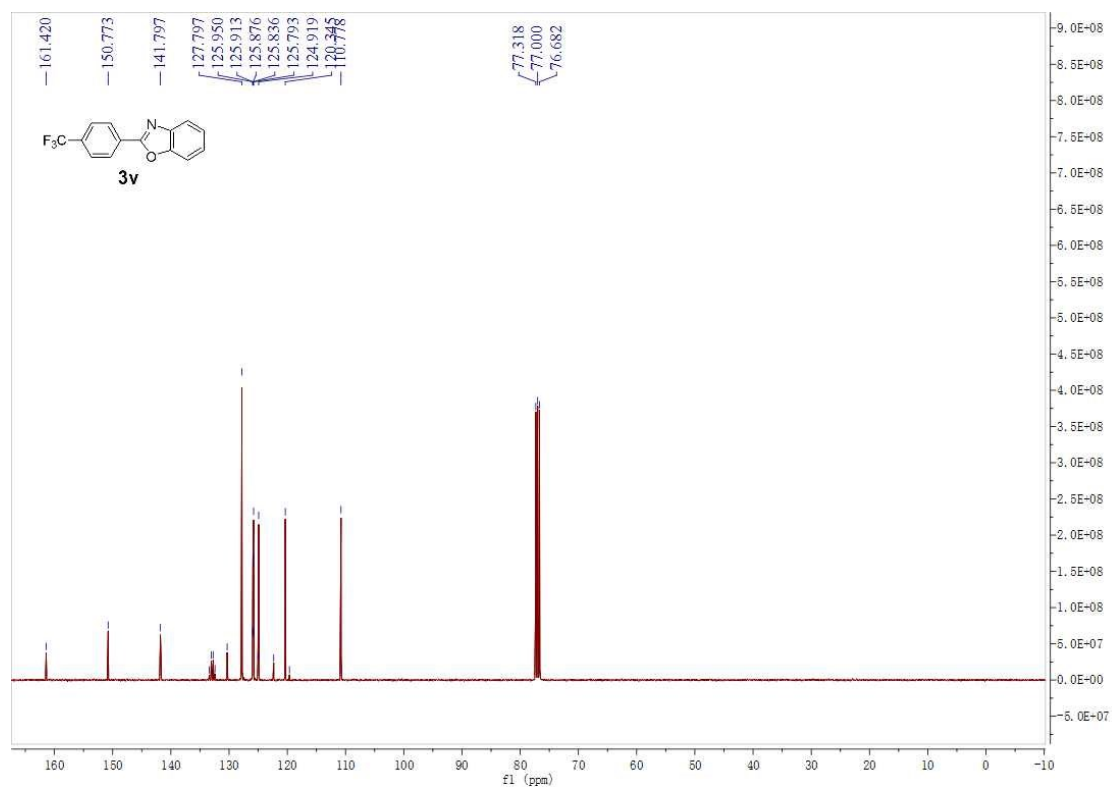

$^{19}\text{F}$  NMR (376 MHz,  $\text{CDCl}_3$ )

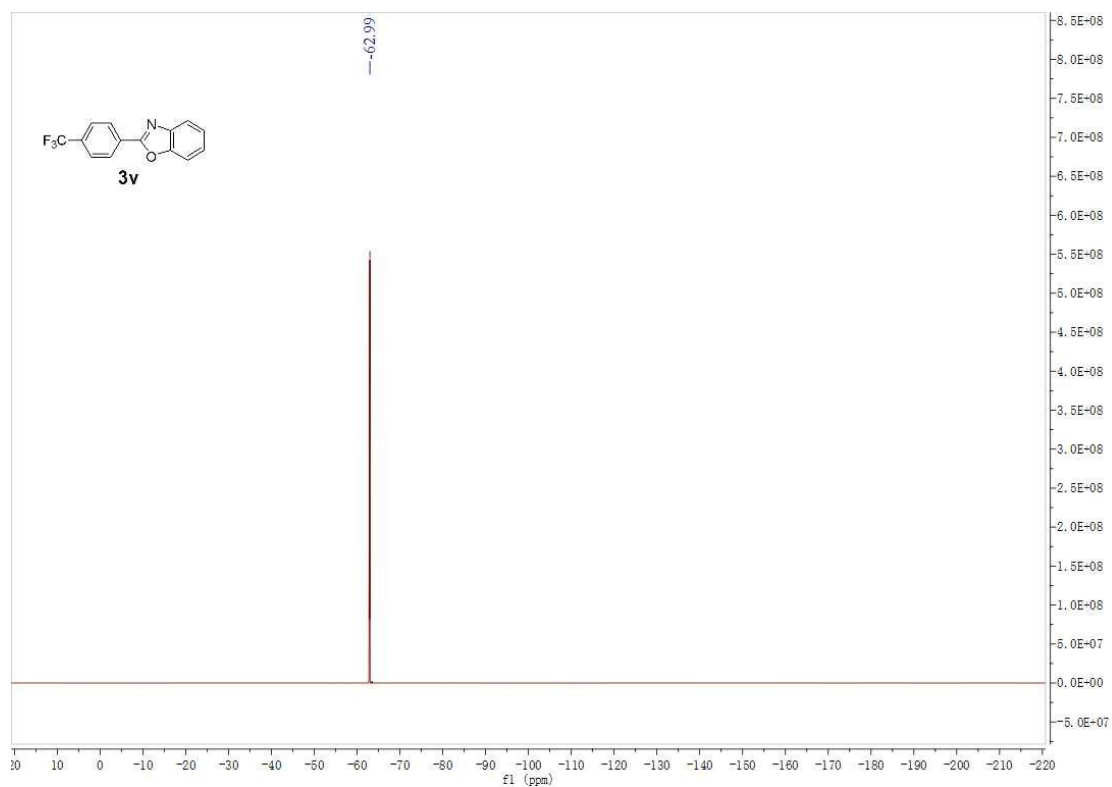

$^1\text{H}$  NMR (400 MHz,  $\text{CDCl}_3$ )

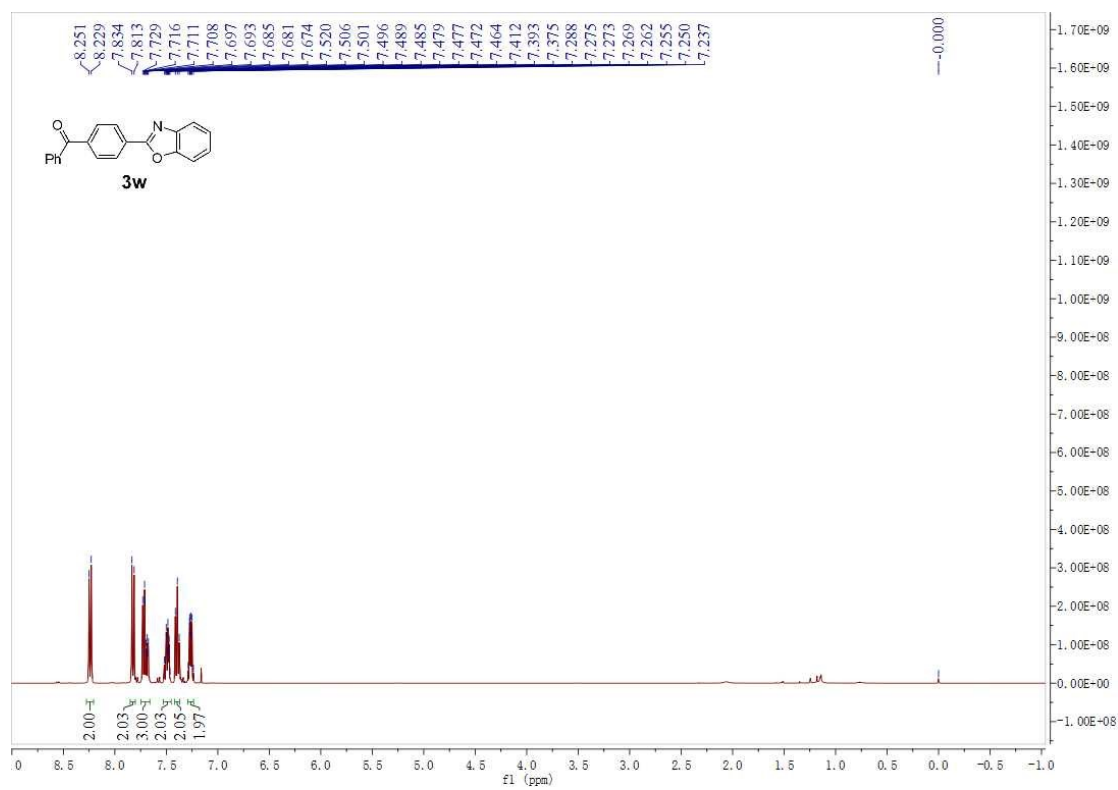



$^{13}\text{C}$  NMR (100 MHz,  $\text{CDCl}_3$ )

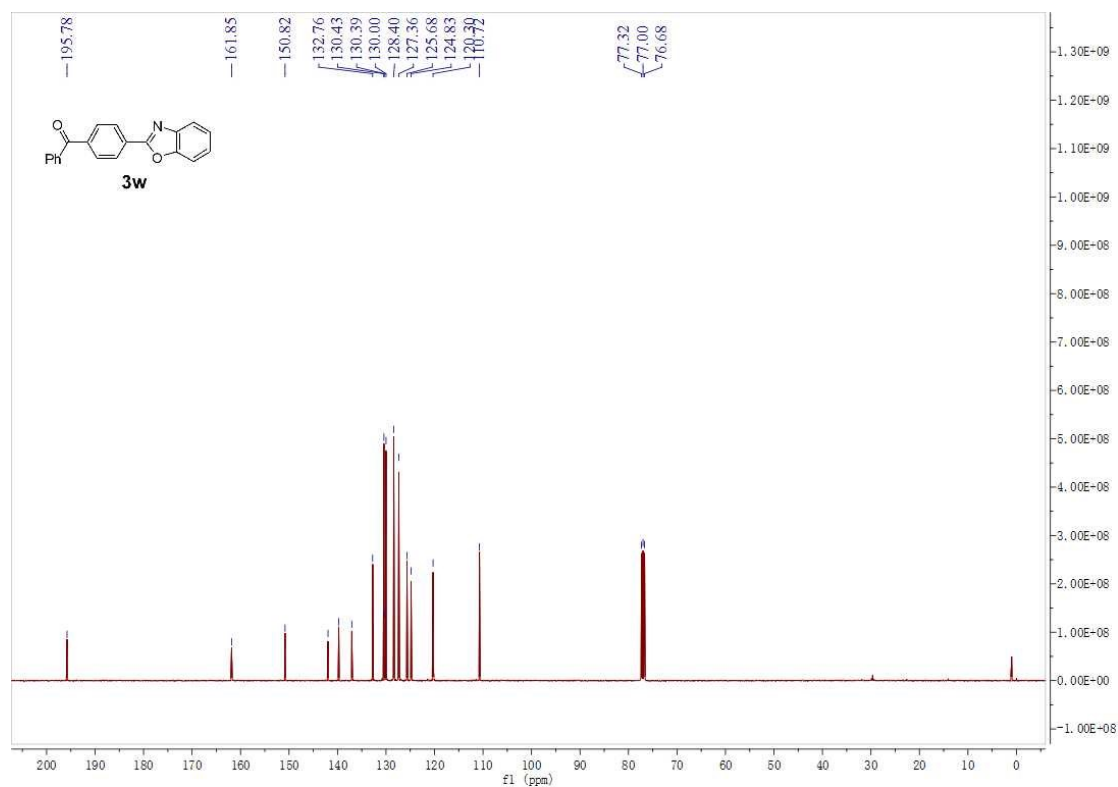

$^1\text{H}$  NMR (400 MHz,  $\text{CDCl}_3$ )

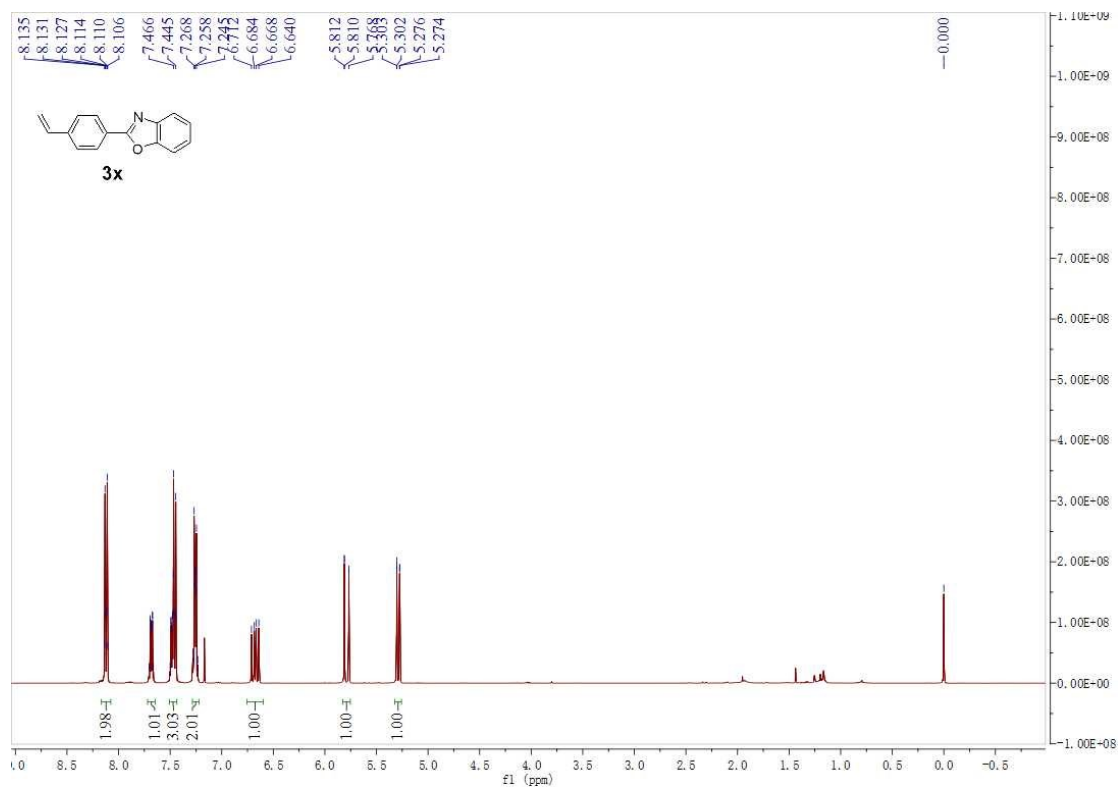

<sup>13</sup>C NMR (100 MHz, CDCl<sub>3</sub>)

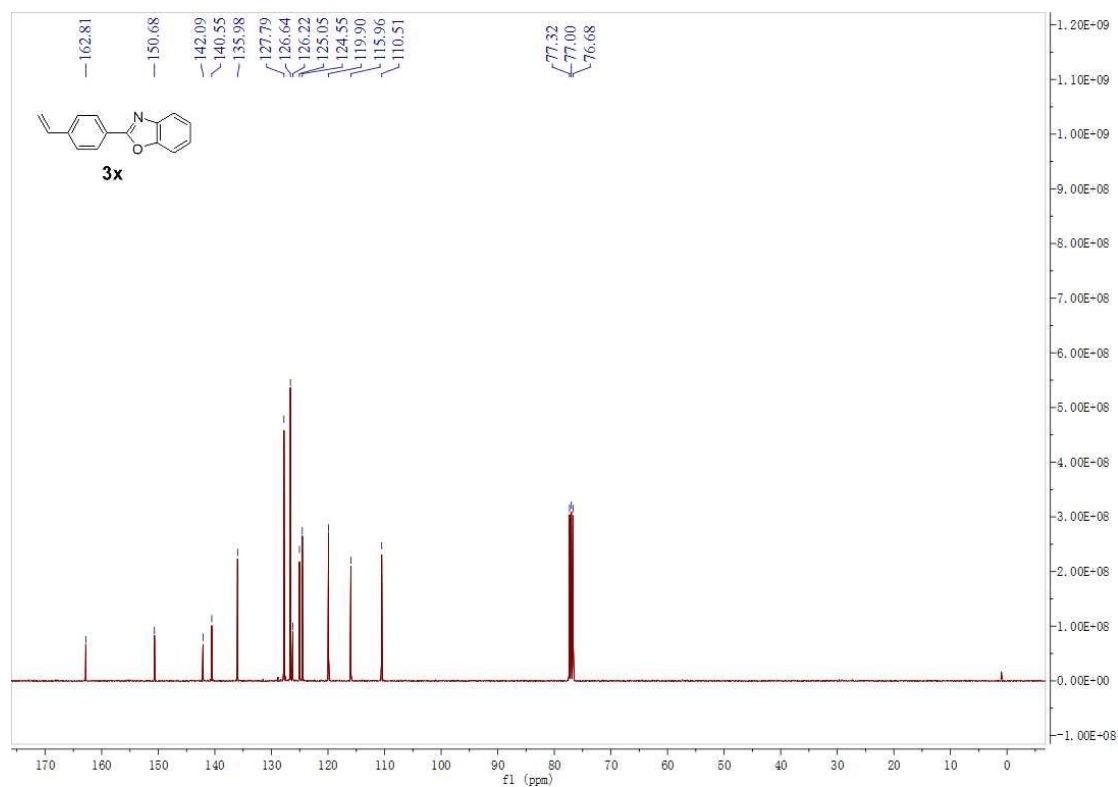

<sup>1</sup>H NMR (400 MHz, CDCl<sub>3</sub>)

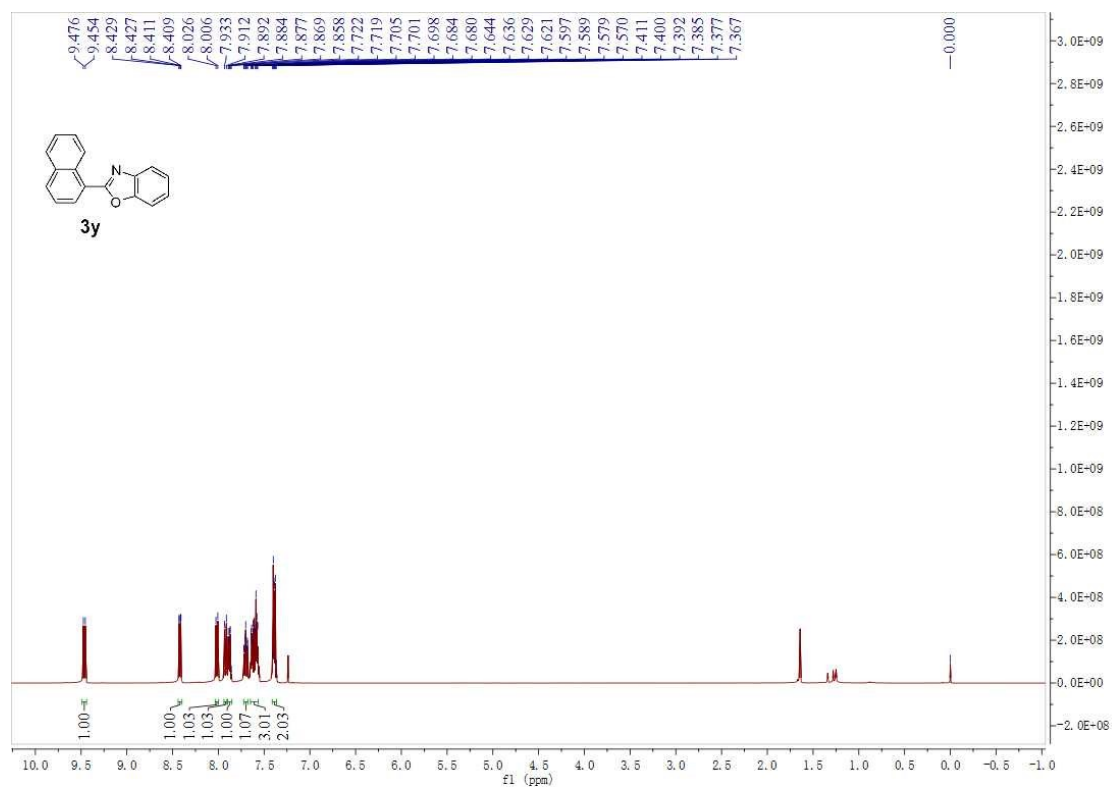

<sup>13</sup>C NMR (100 MHz, CDCl<sub>3</sub>)

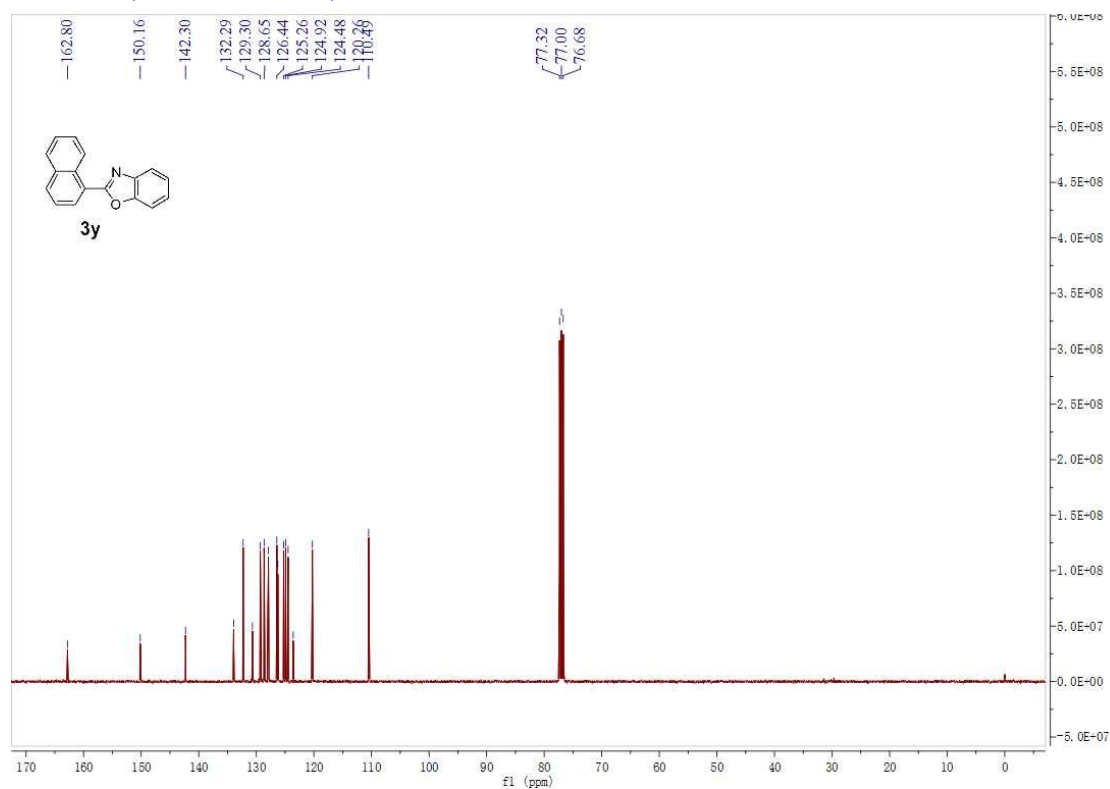

<sup>1</sup>H NMR (400 MHz, CDCl<sub>3</sub>)

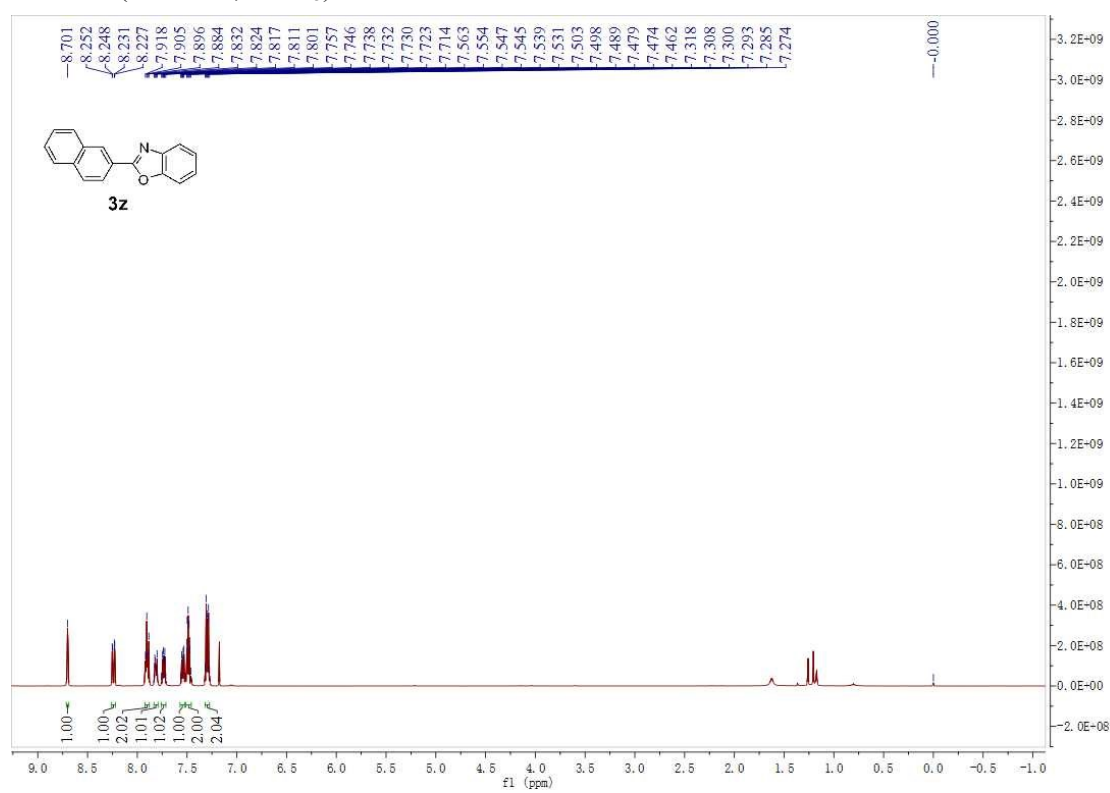

$^{13}\text{C}$  NMR (100 MHz,  $\text{CDCl}_3$ )

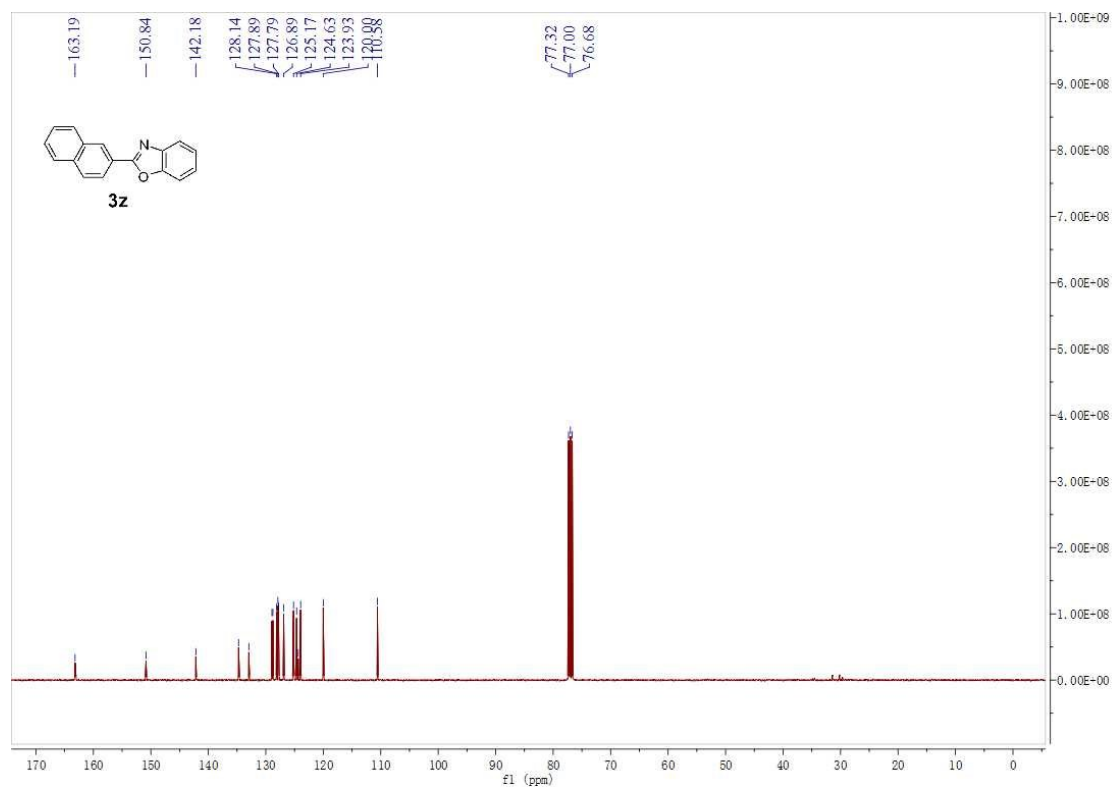

$^1\text{H}$  NMR (400 MHz,  $\text{CDCl}_3$ )

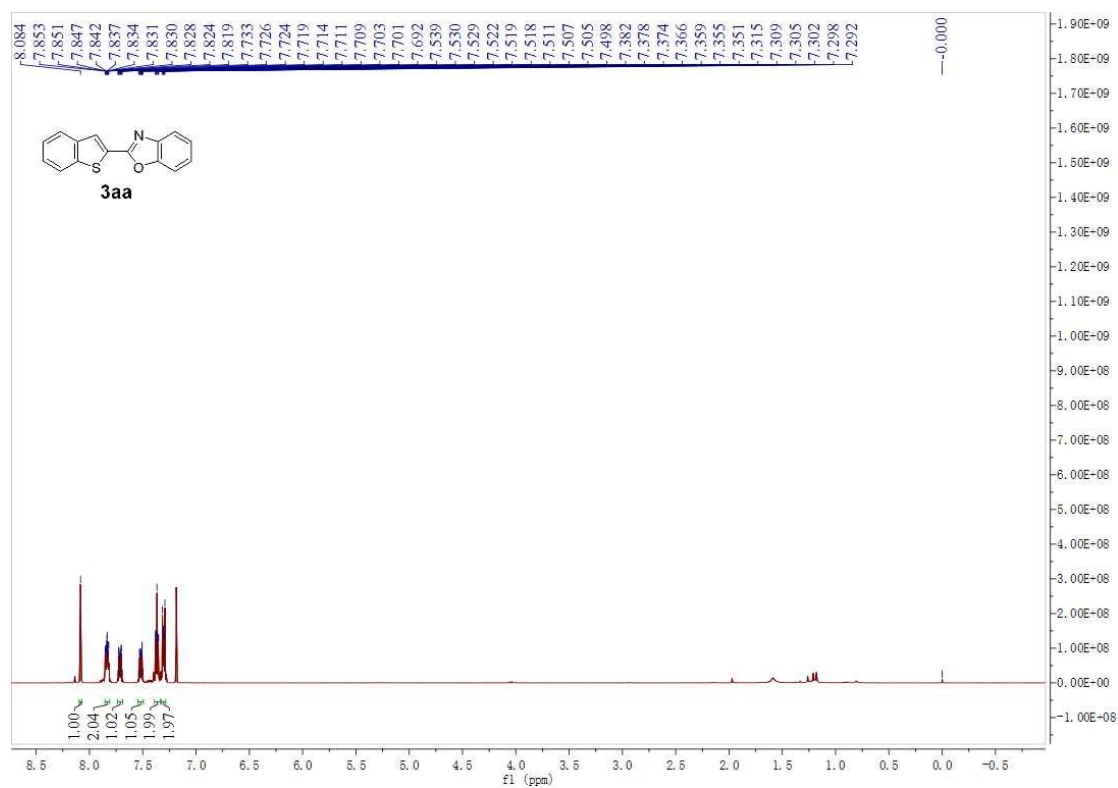

<sup>13</sup>C NMR (100 MHz, CDCl<sub>3</sub>)

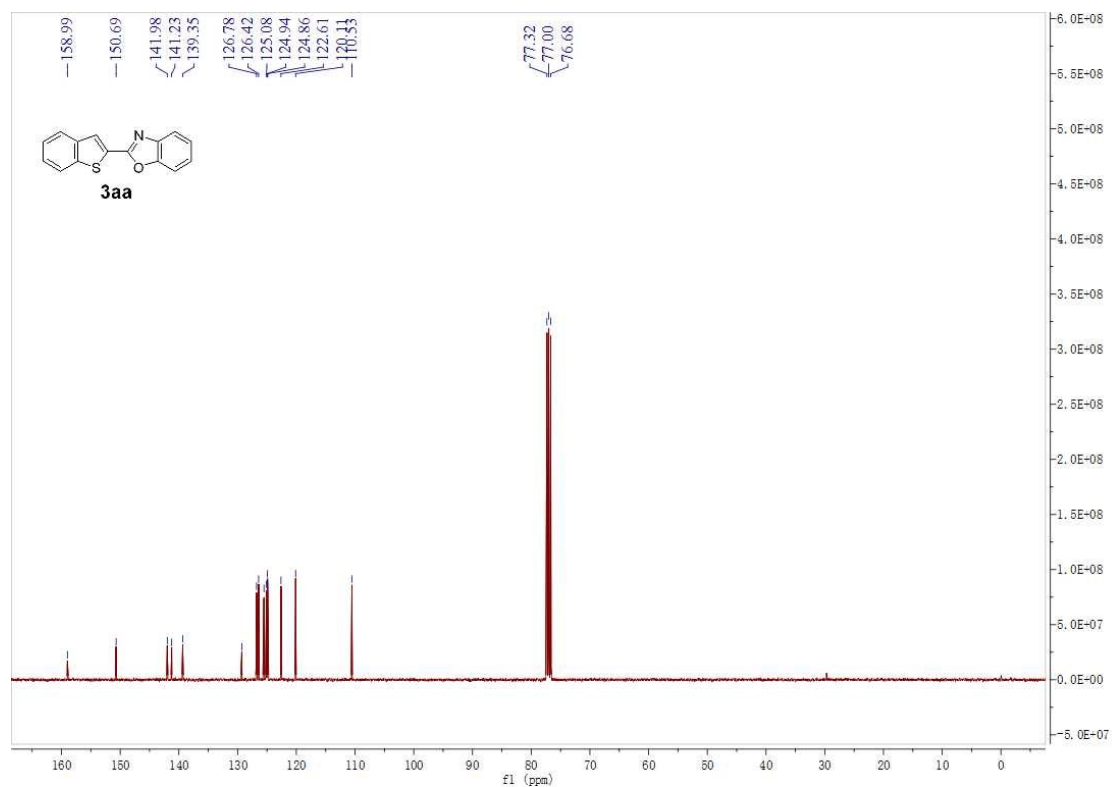

<sup>1</sup>H NMR (400 MHz, CDCl<sub>3</sub>)

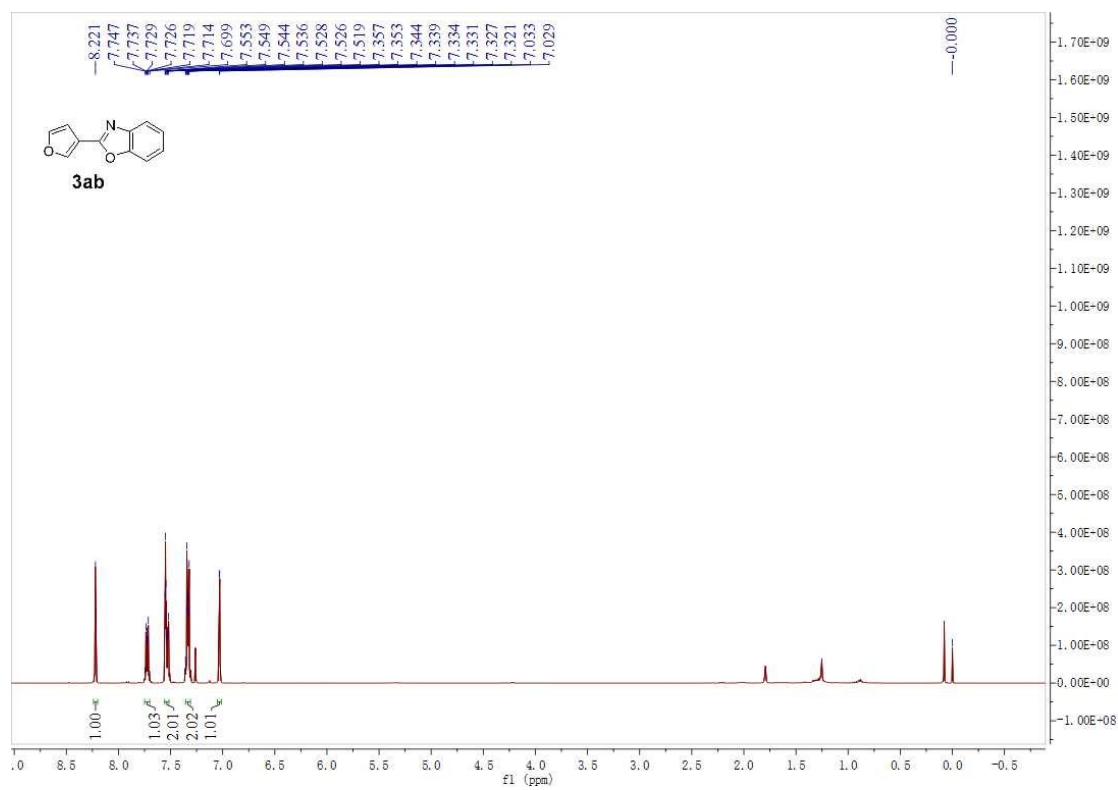

<sup>13</sup>C NMR (100 MHz, CDCl<sub>3</sub>)

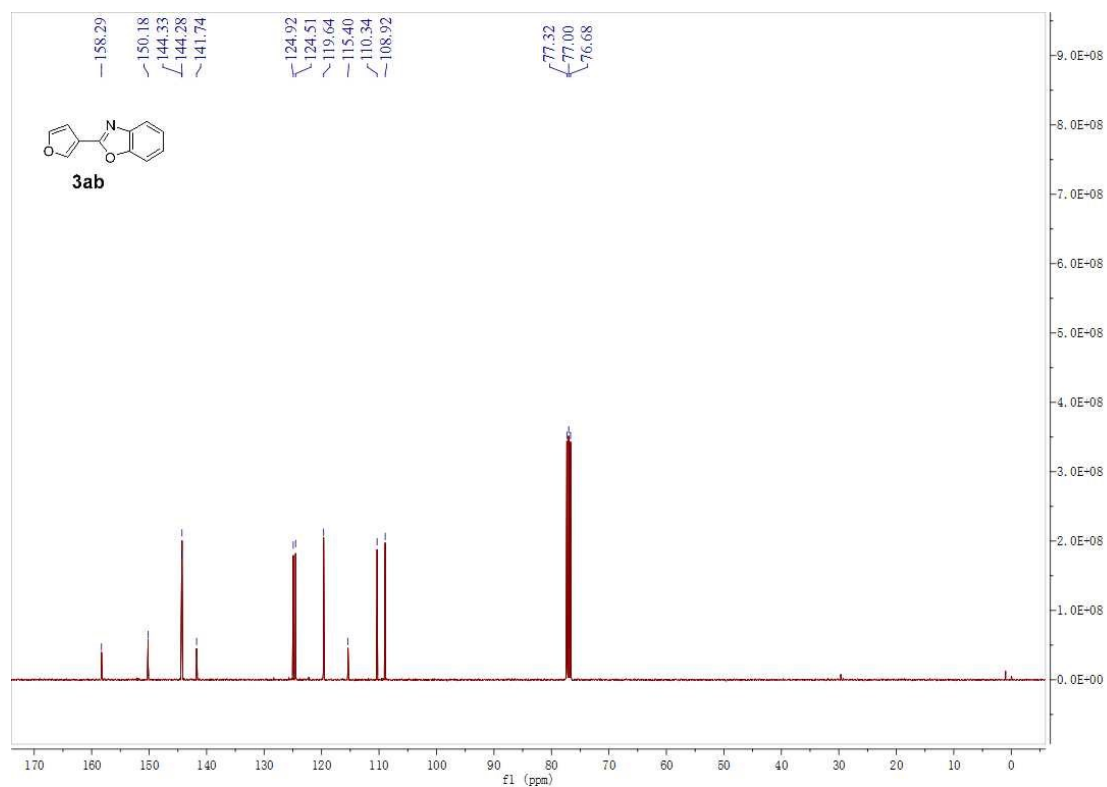

<sup>1</sup>H NMR (400 MHz, CDCl<sub>3</sub>)

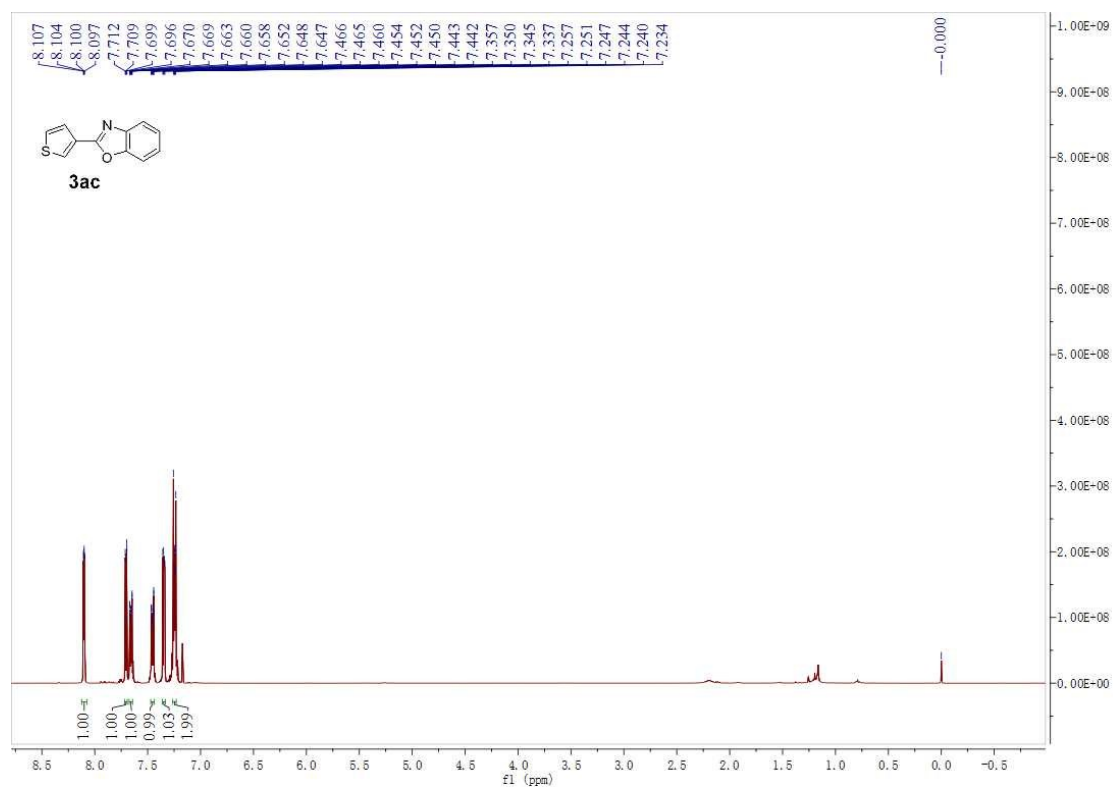

$^{13}\text{C}$  NMR (100 MHz,  $\text{CDCl}_3$ )

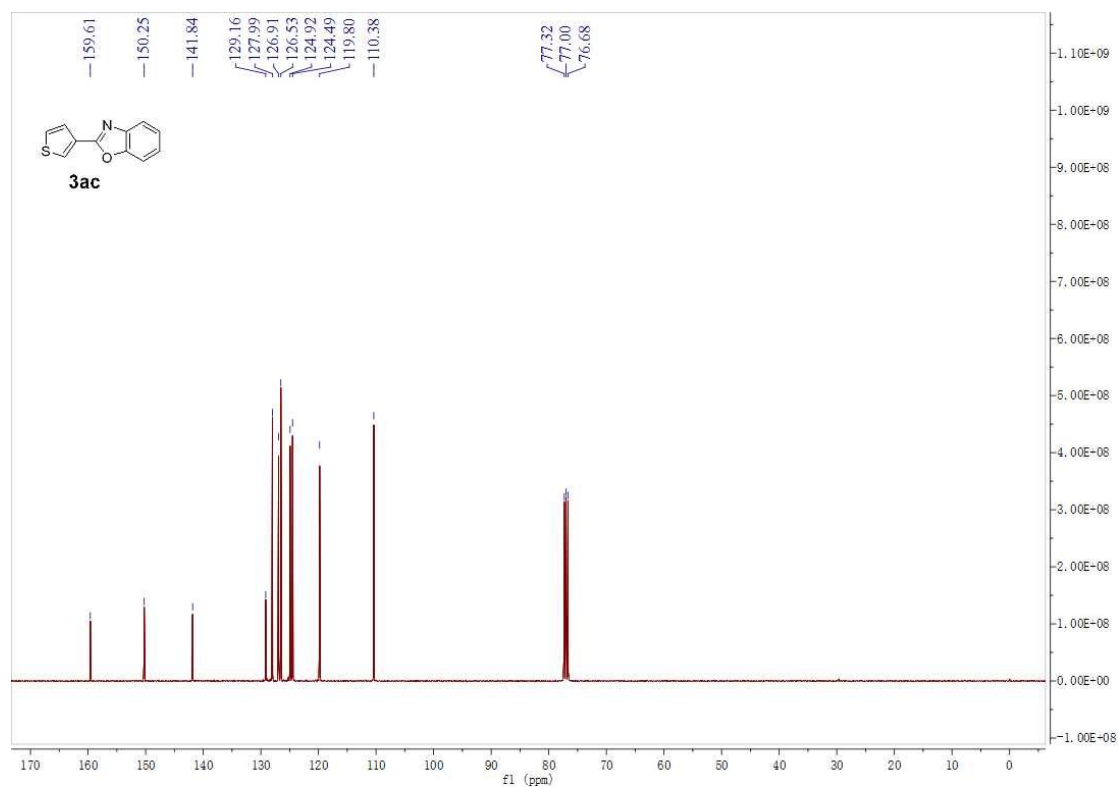

$^1\text{H}$  NMR (400 MHz,  $\text{CDCl}_3$ )

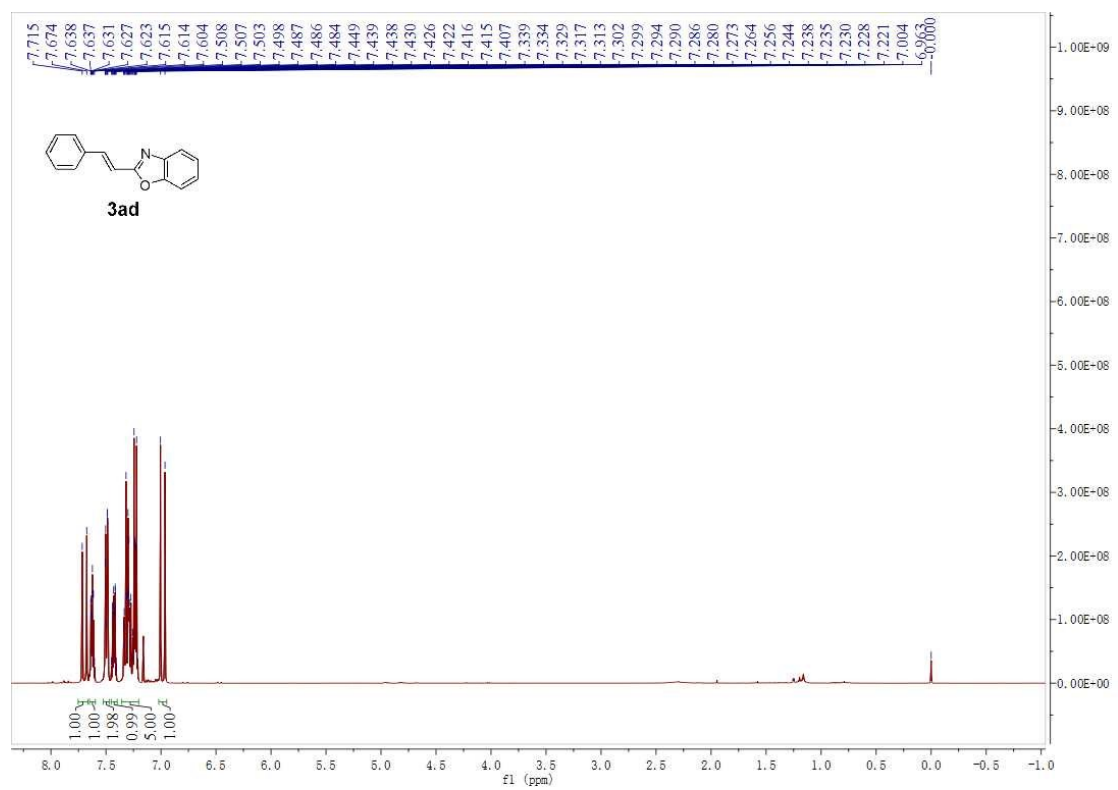

<sup>13</sup>C NMR (100 MHz, CDCl<sub>3</sub>)

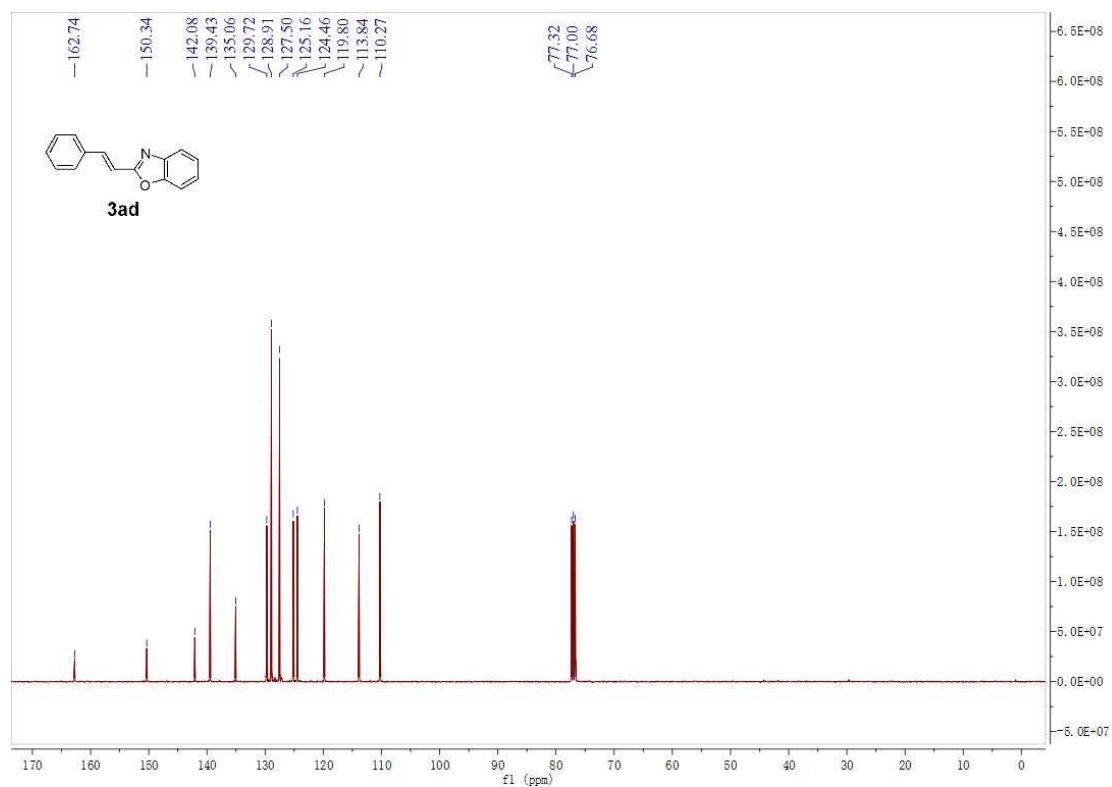

<sup>1</sup>H NMR (400 MHz, CDCl<sub>3</sub>)

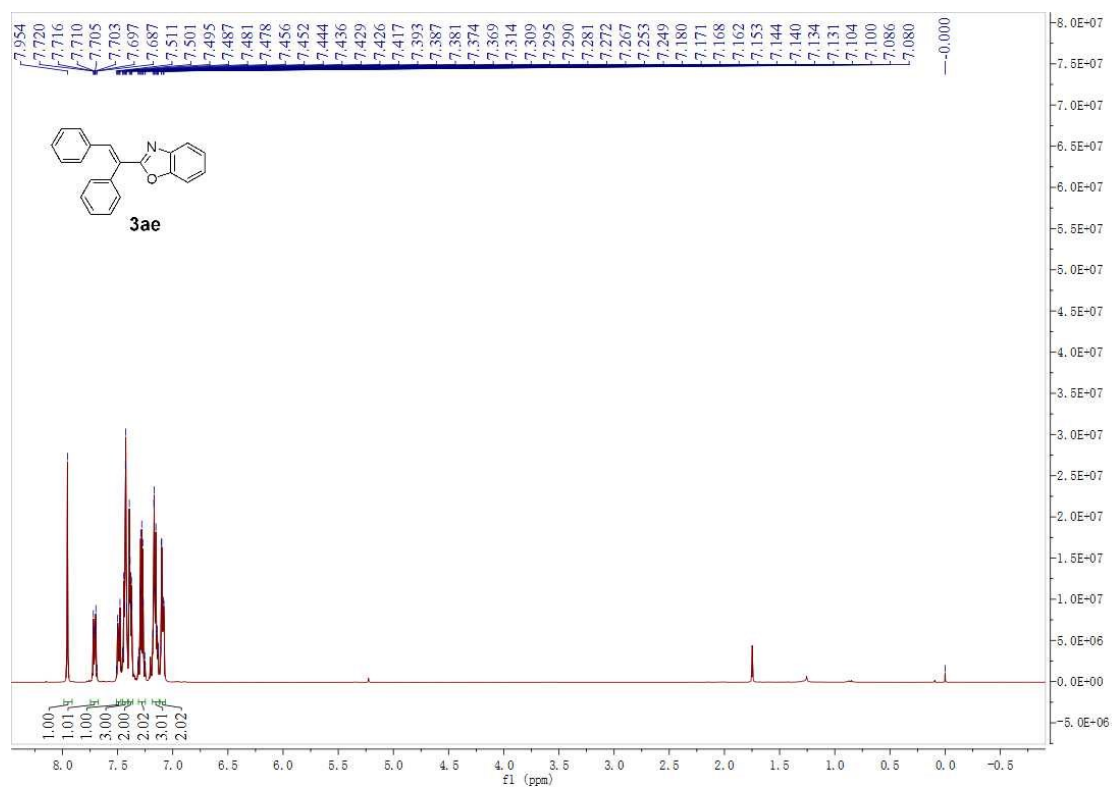



<sup>13</sup>C NMR (100 MHz, CDCl<sub>3</sub>)

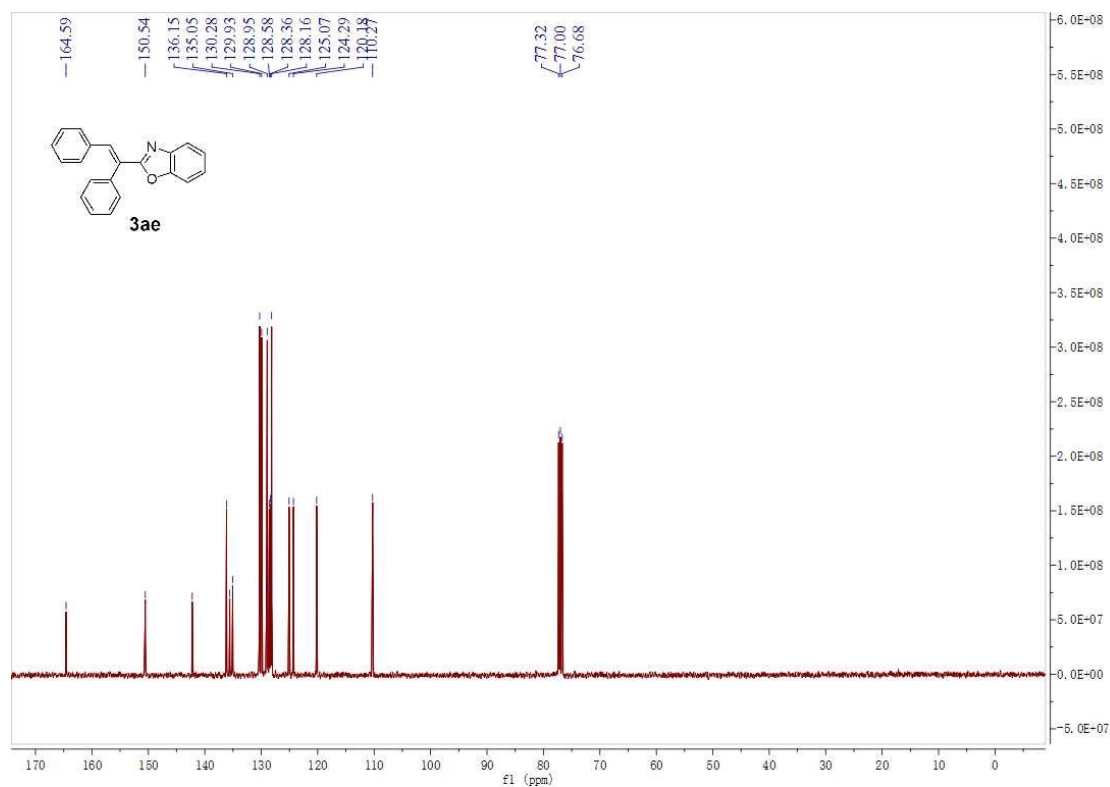

<sup>1</sup>H NMR (400 MHz, CDCl<sub>3</sub>)

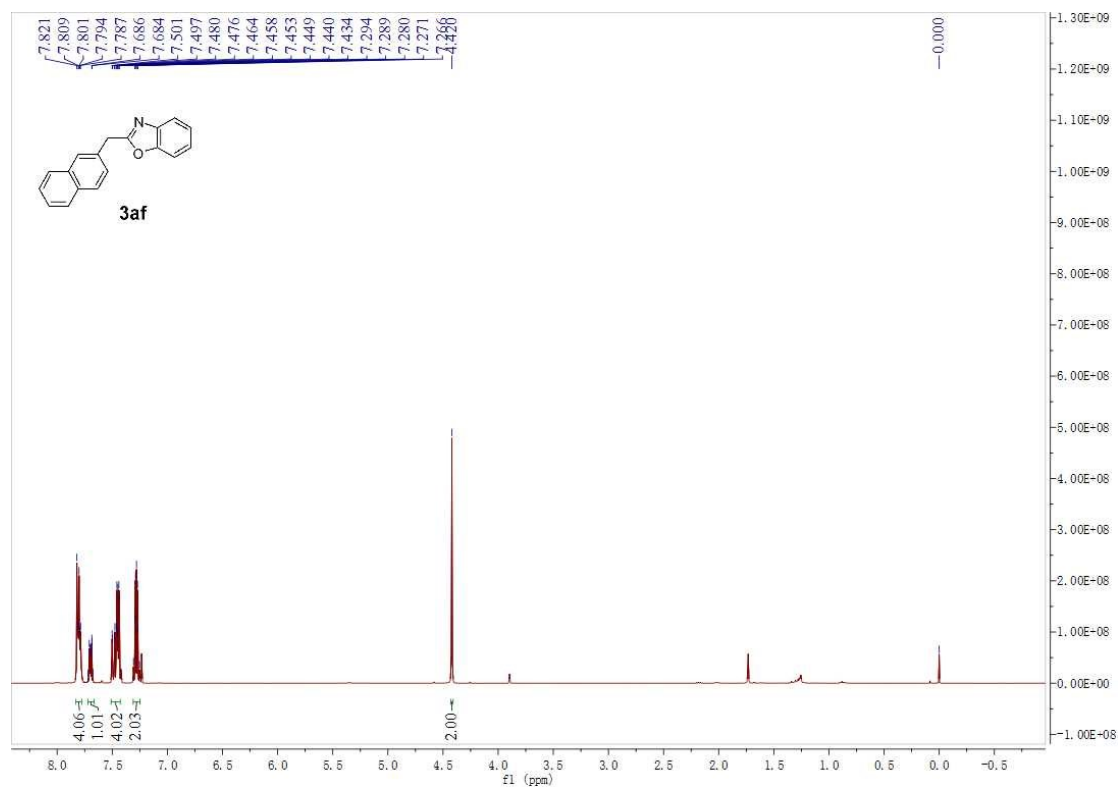

$^{13}\text{C}$  NMR (100 MHz,  $\text{CDCl}_3$ )

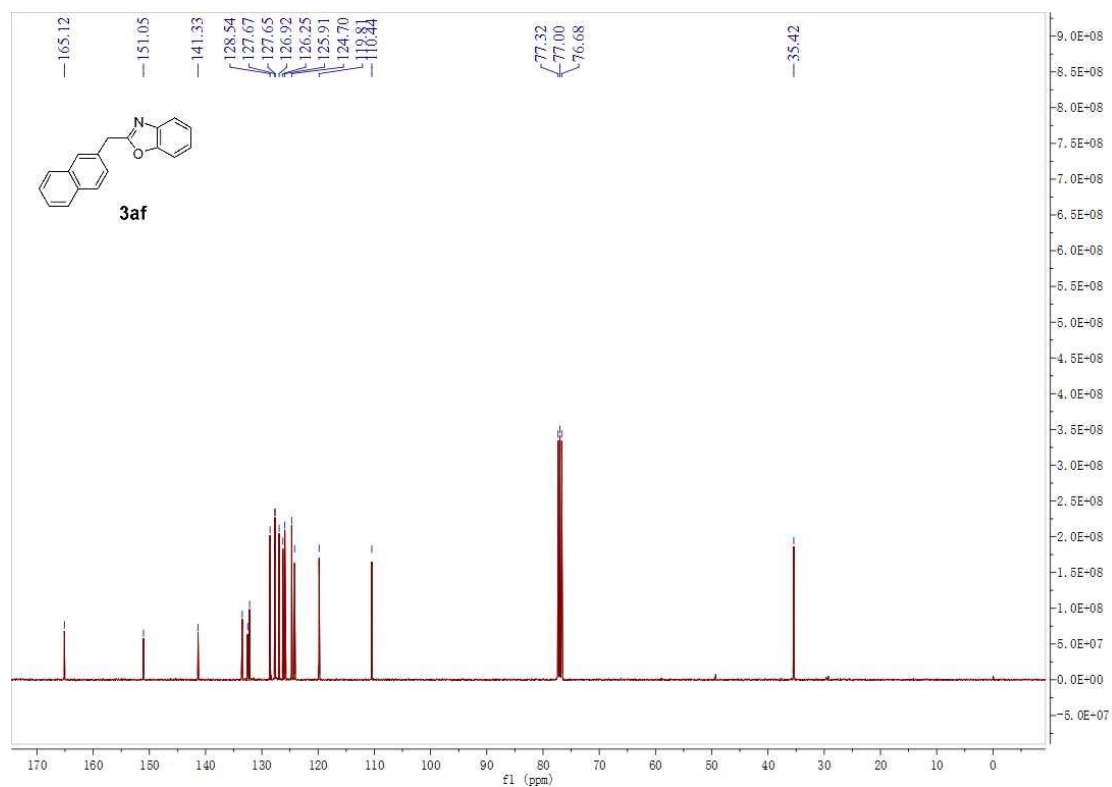

$^1\text{H}$  NMR (400 MHz,  $\text{CDCl}_3$ )

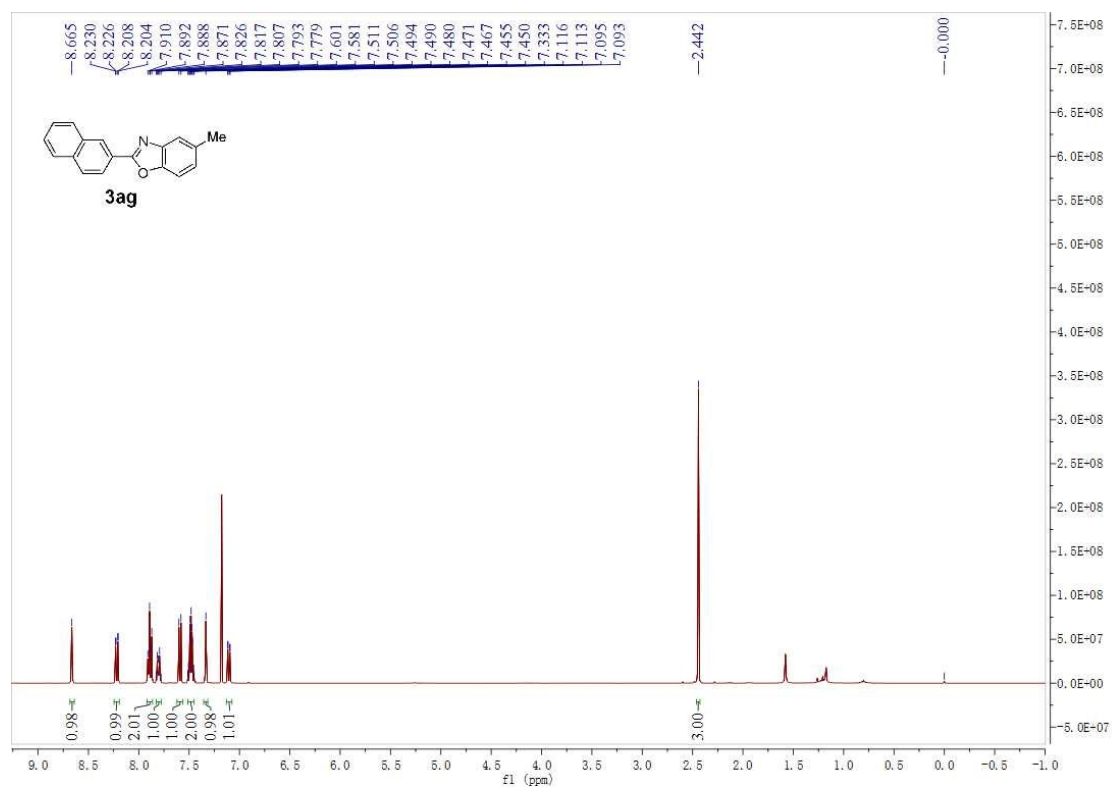

$^{13}\text{C}$  NMR (100 MHz,  $\text{CDCl}_3$ )

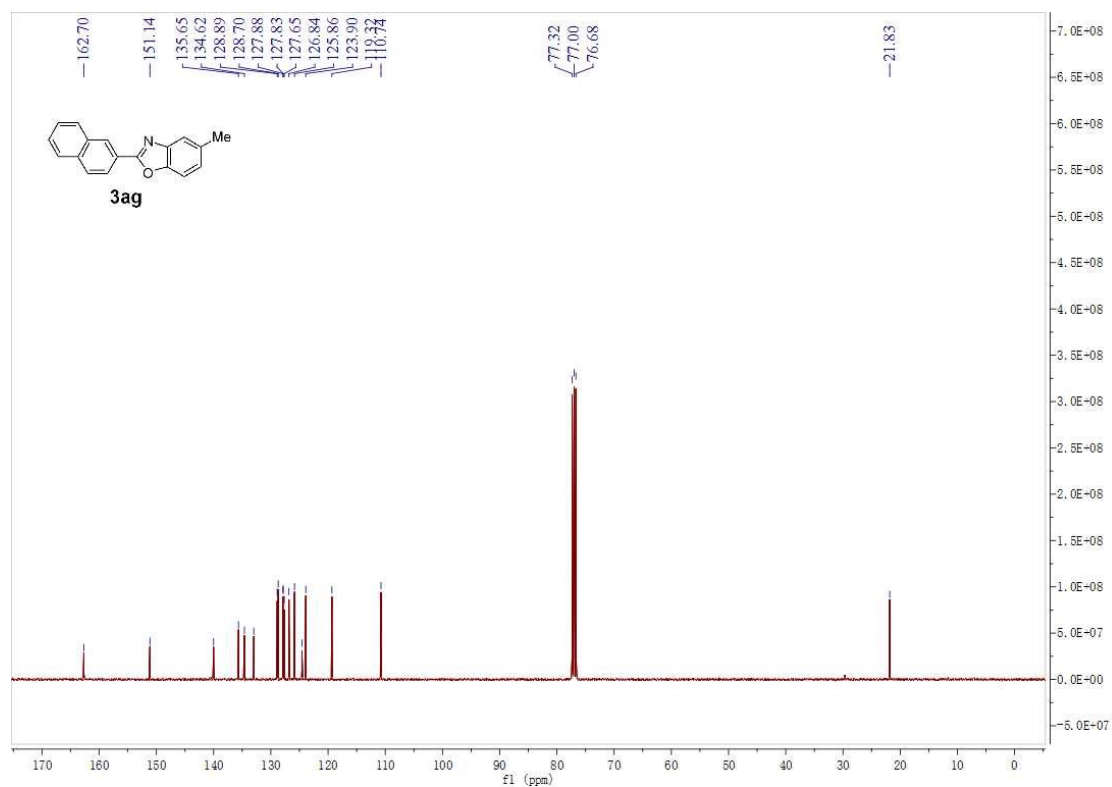

$^1\text{H}$  NMR (400 MHz,  $\text{CDCl}_3$ )

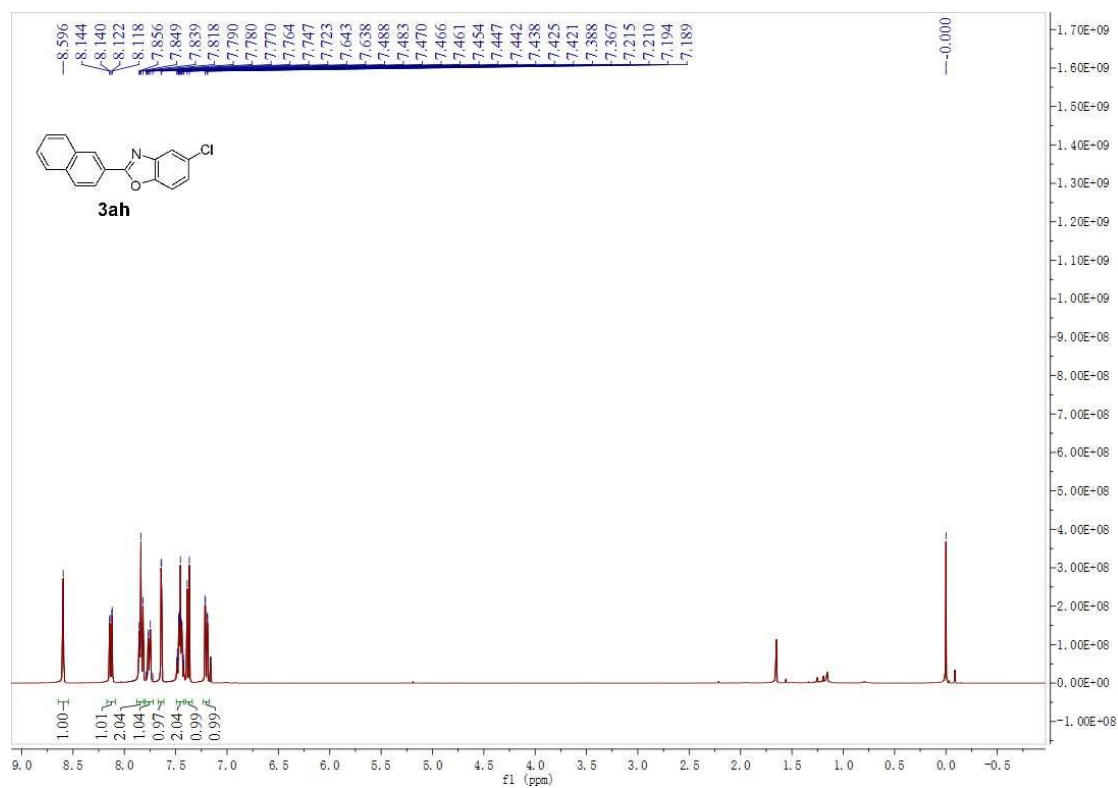

$^{13}\text{C}$  NMR (100 MHz,  $\text{CDCl}_3$ )

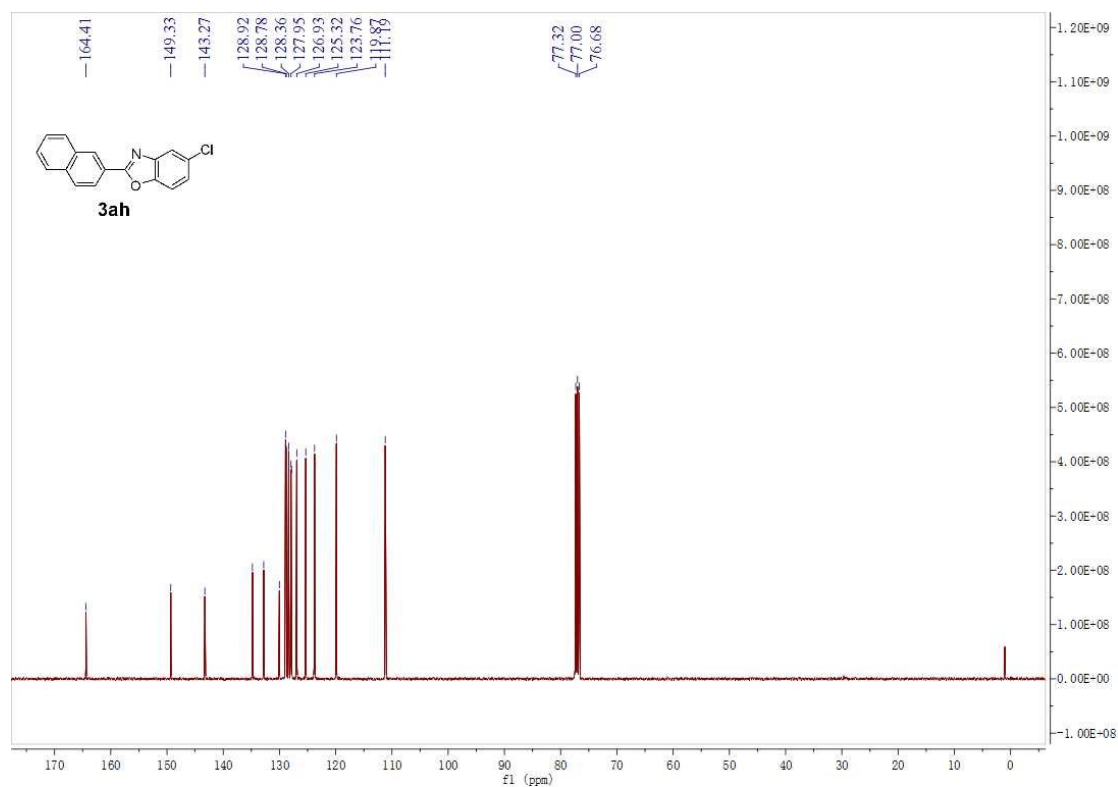

$^1\text{H}$  NMR (400 MHz,  $\text{CDCl}_3$ )

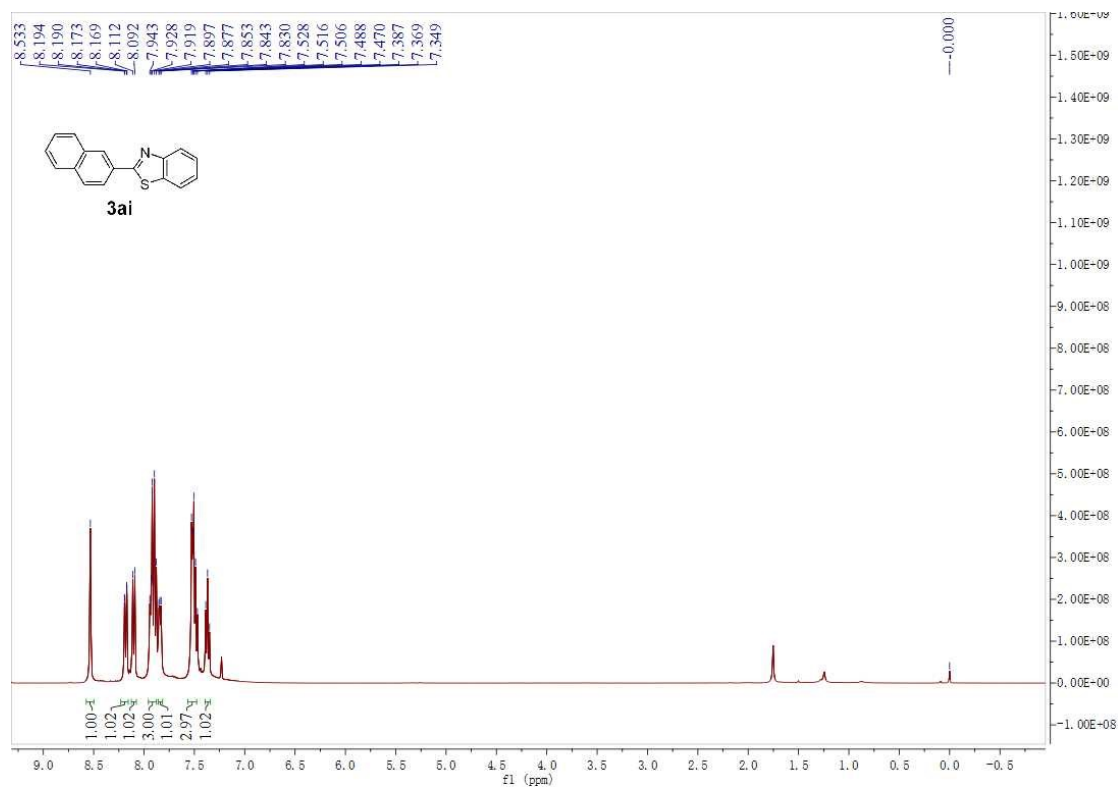

<sup>13</sup>C NMR (100 MHz, CDCl<sub>3</sub>)

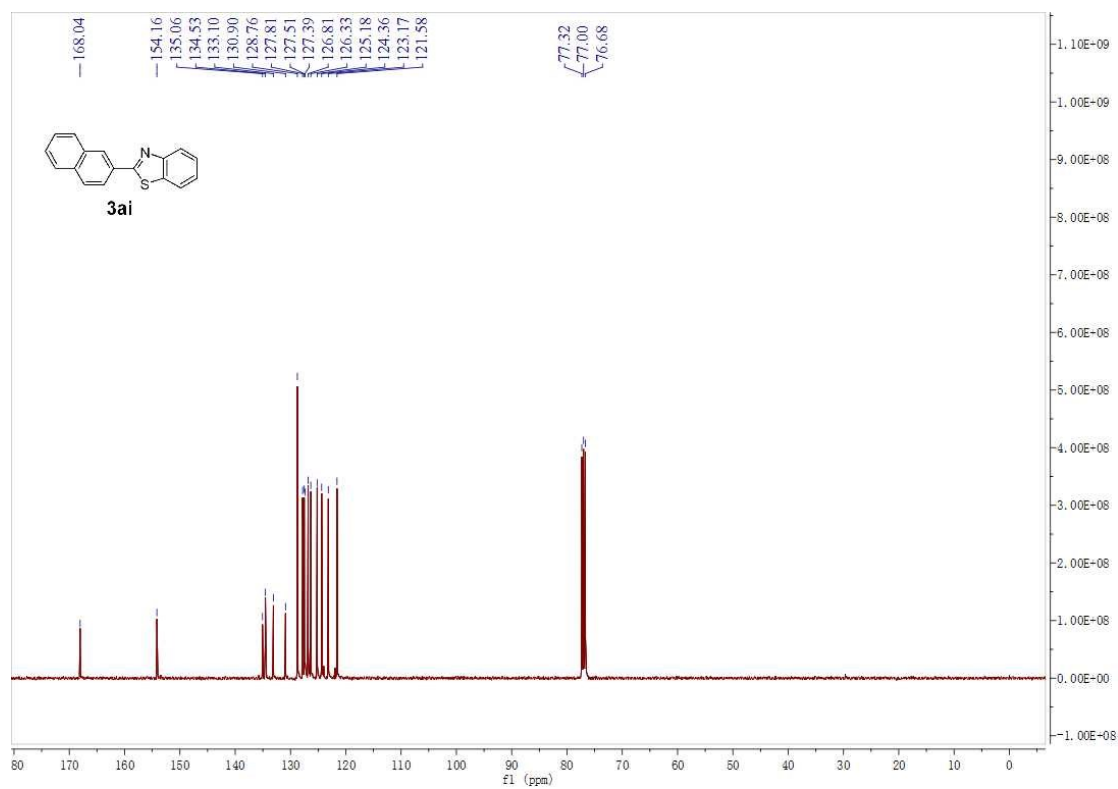

<sup>1</sup>H NMR (400 MHz, CDCl<sub>3</sub>)

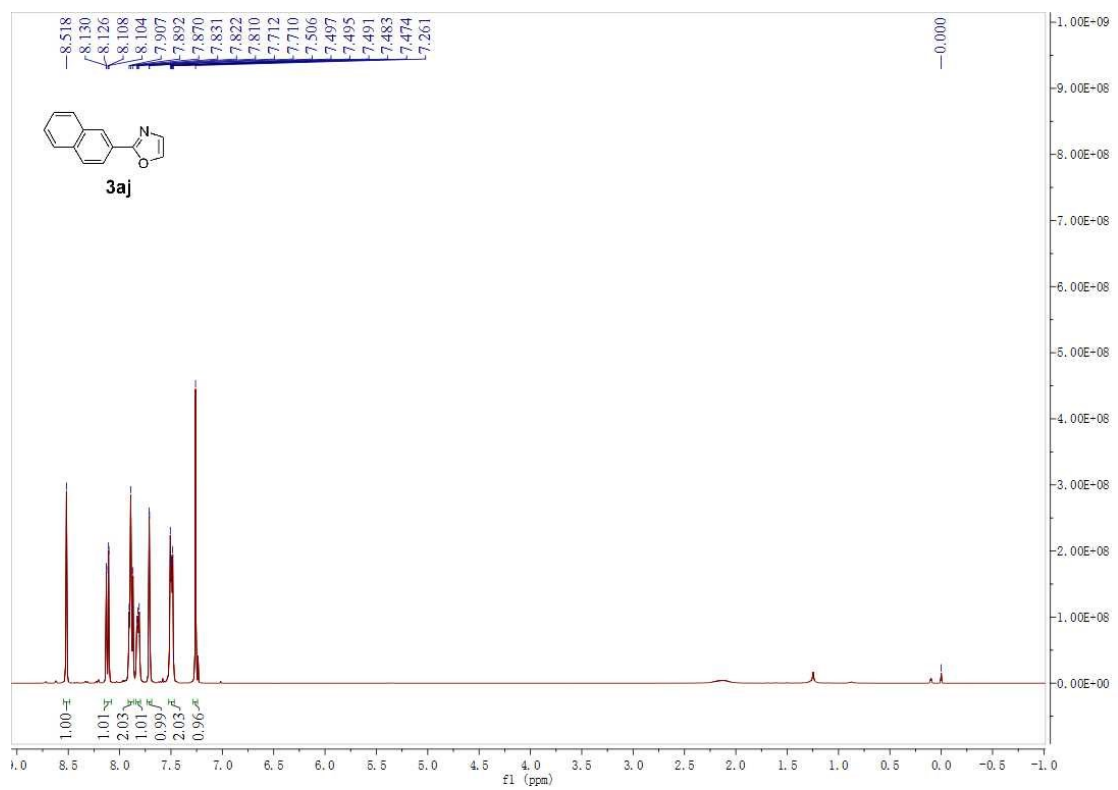

<sup>13</sup>C NMR (100 MHz, CDCl<sub>3</sub>)

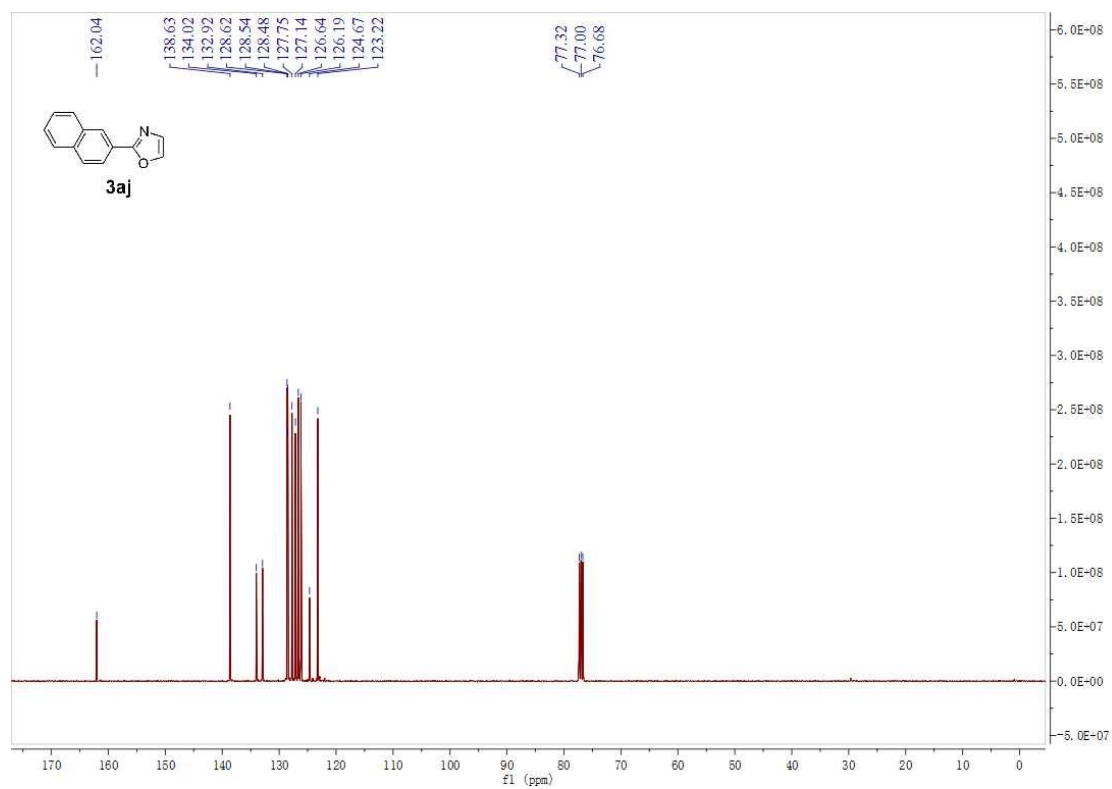

<sup>1</sup>H NMR (400 MHz, CDCl<sub>3</sub>)

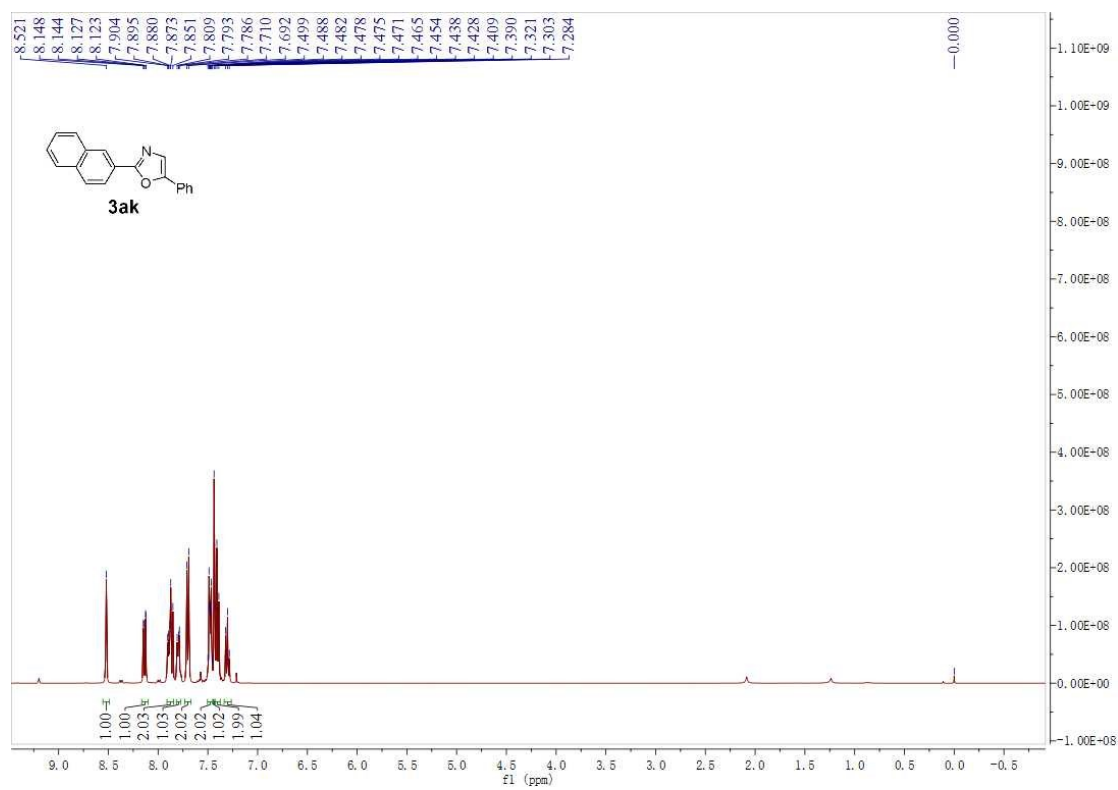

<sup>13</sup>C NMR (100 MHz, CDCl<sub>3</sub>)

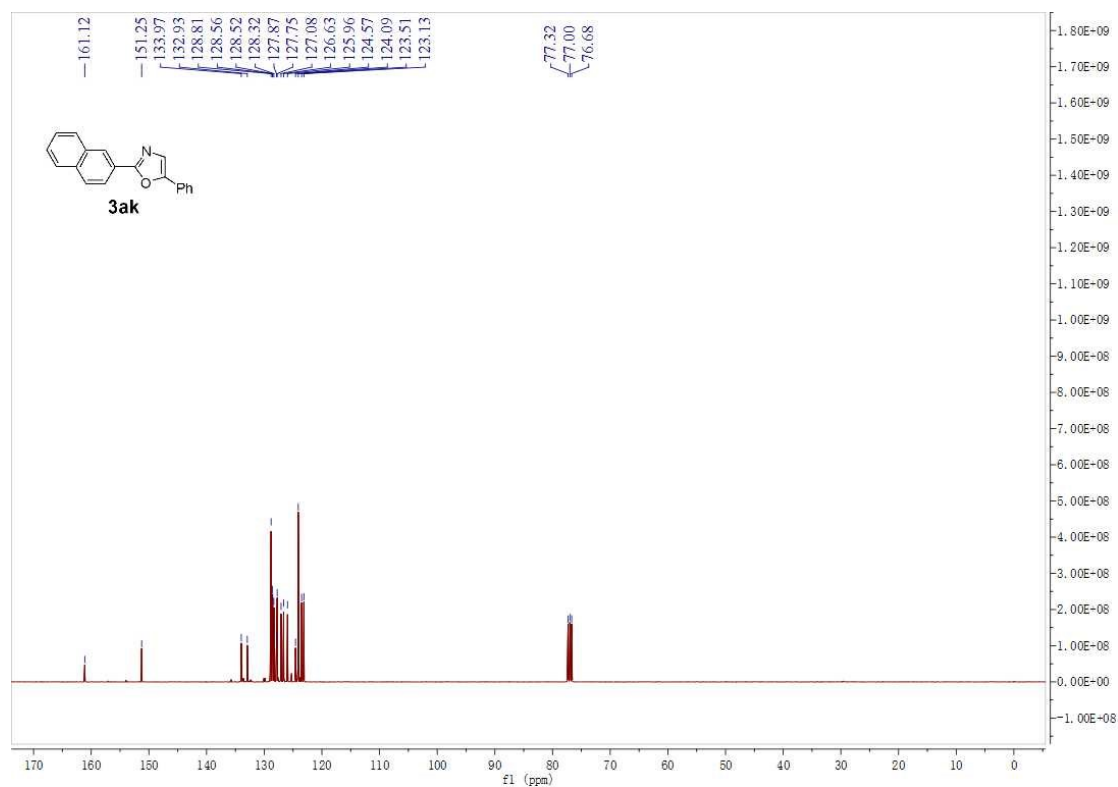

<sup>1</sup>H NMR (400 MHz, CDCl<sub>3</sub>)

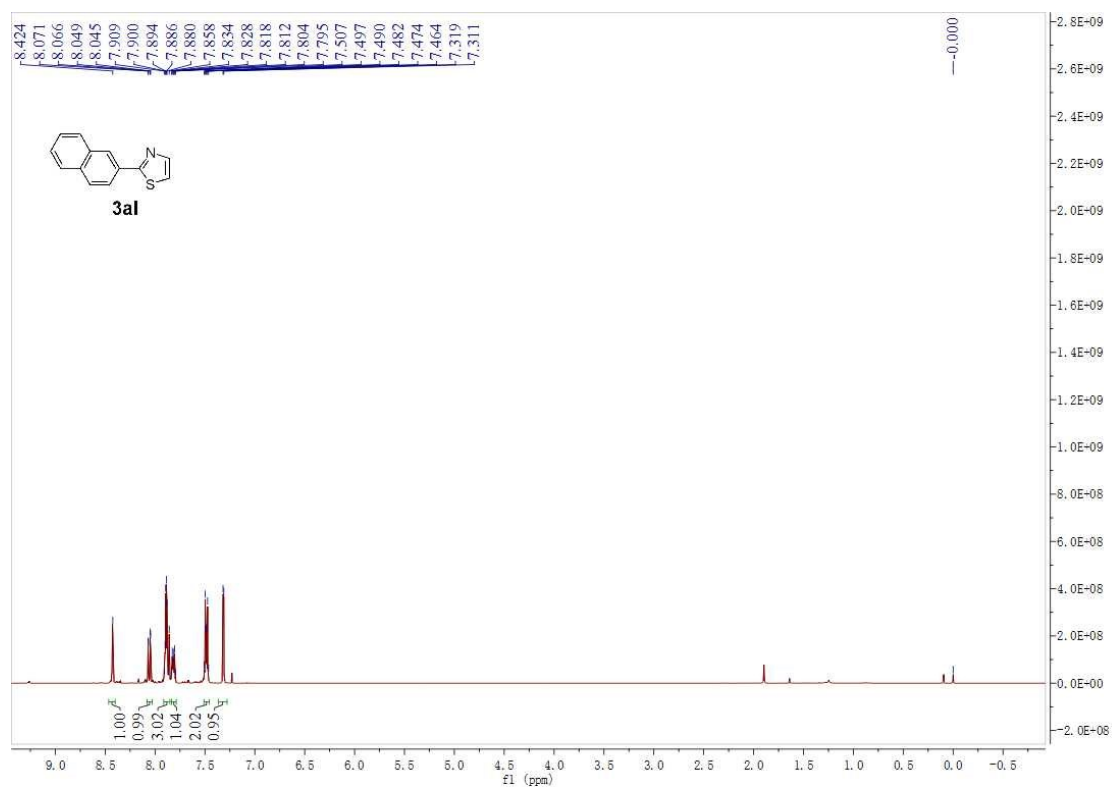

<sup>13</sup>C NMR (100 MHz, CDCl<sub>3</sub>)

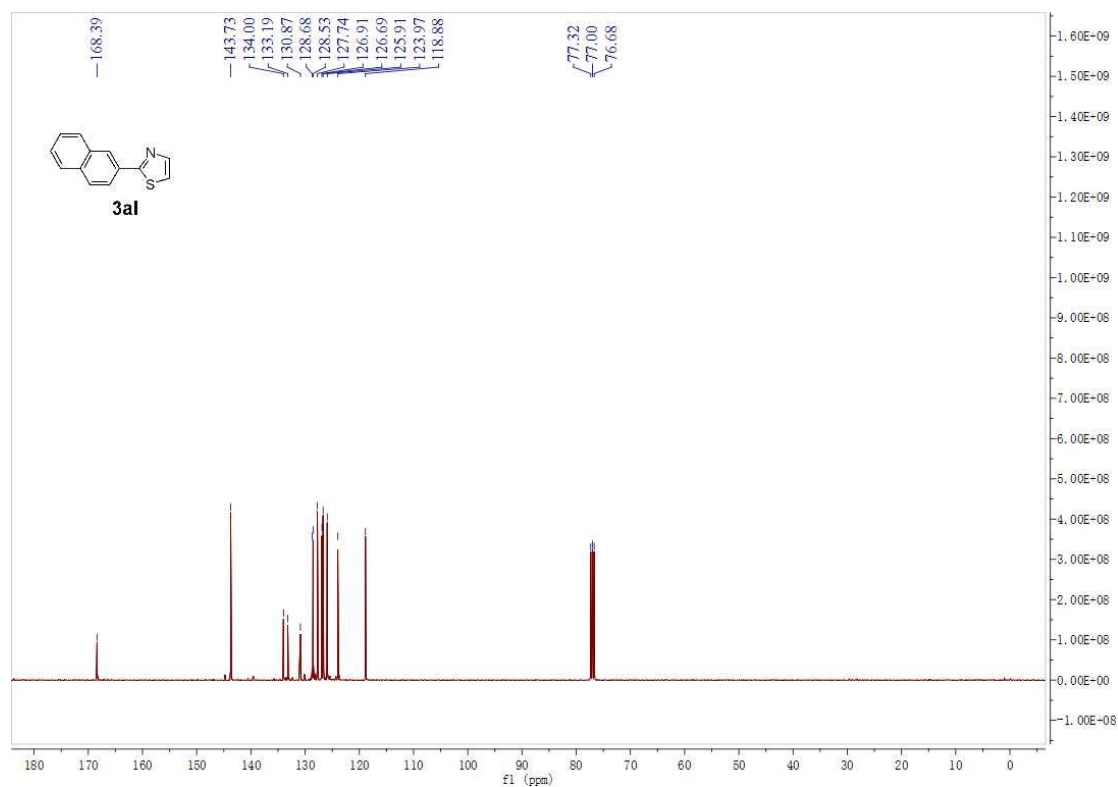

<sup>1</sup>H NMR (400 MHz, CDCl<sub>3</sub>)

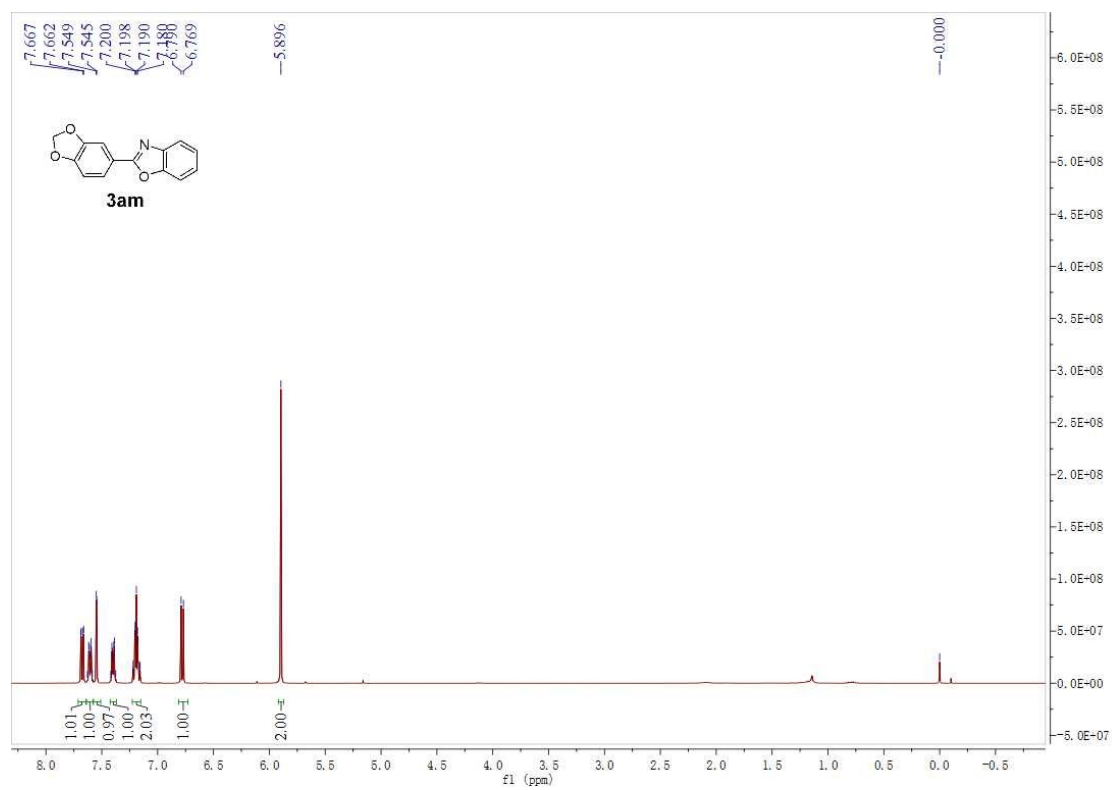



<sup>13</sup>C NMR (100 MHz, CDCl<sub>3</sub>)

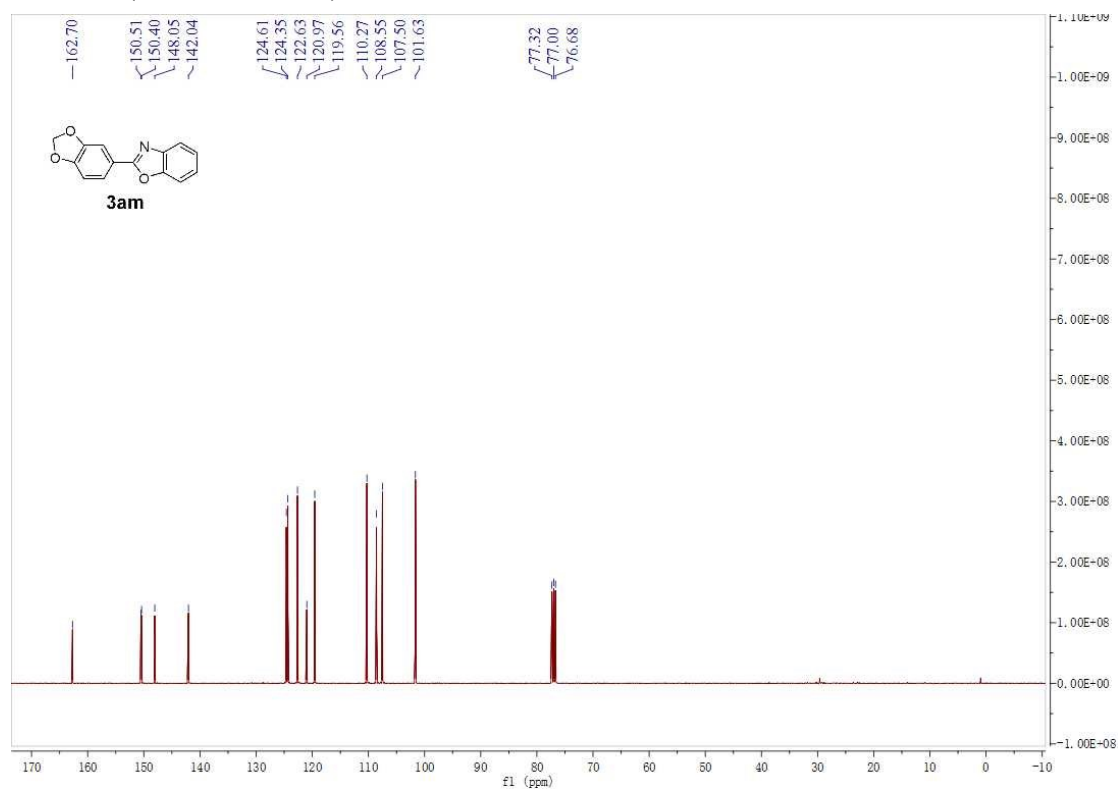

<sup>1</sup>H NMR (400 MHz, CDCl<sub>3</sub>)

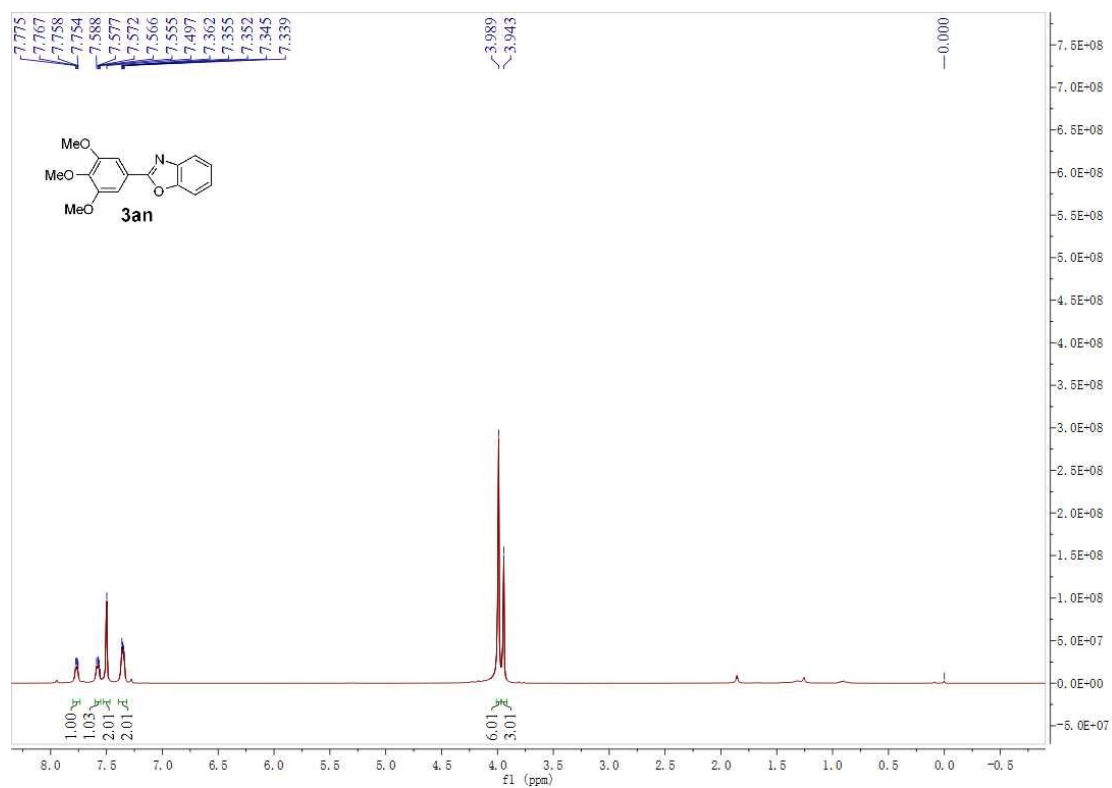

<sup>13</sup>C NMR (100 MHz, CDCl<sub>3</sub>)

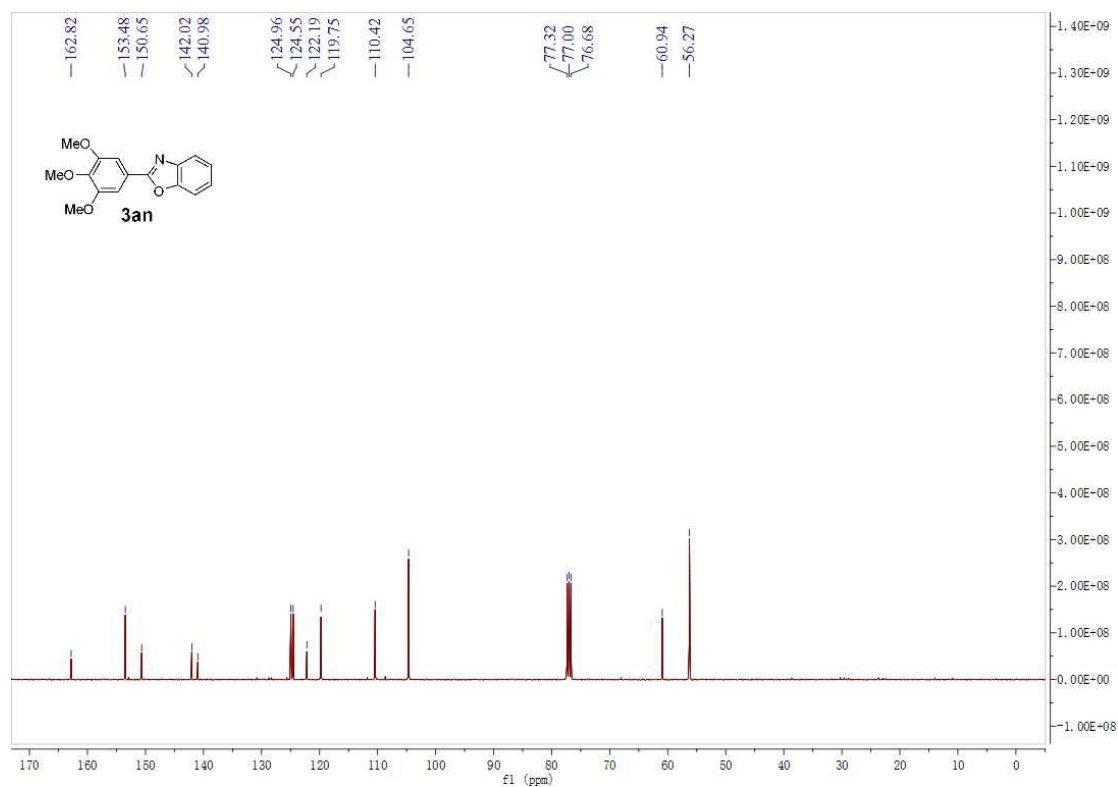

<sup>1</sup>H NMR (400 MHz, CDCl<sub>3</sub>)

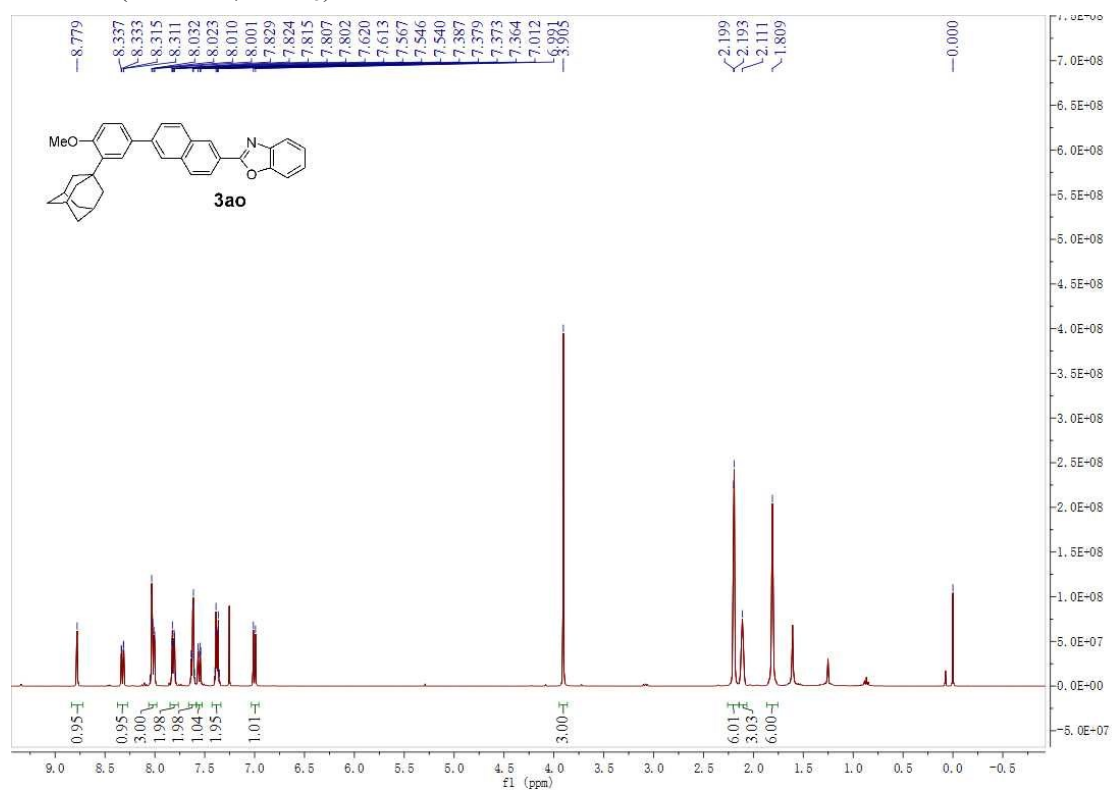

<sup>13</sup>C NMR (100 MHz, CDCl<sub>3</sub>)

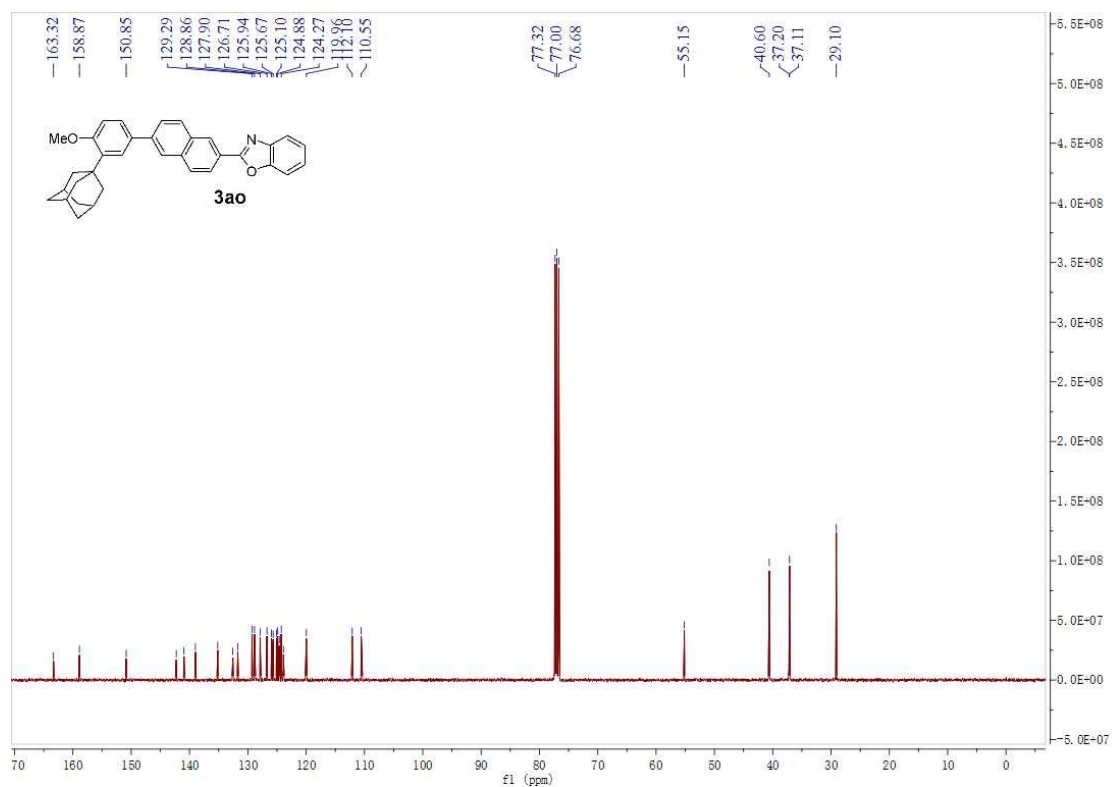

<sup>1</sup>H NMR (400 MHz, CDCl<sub>3</sub>)

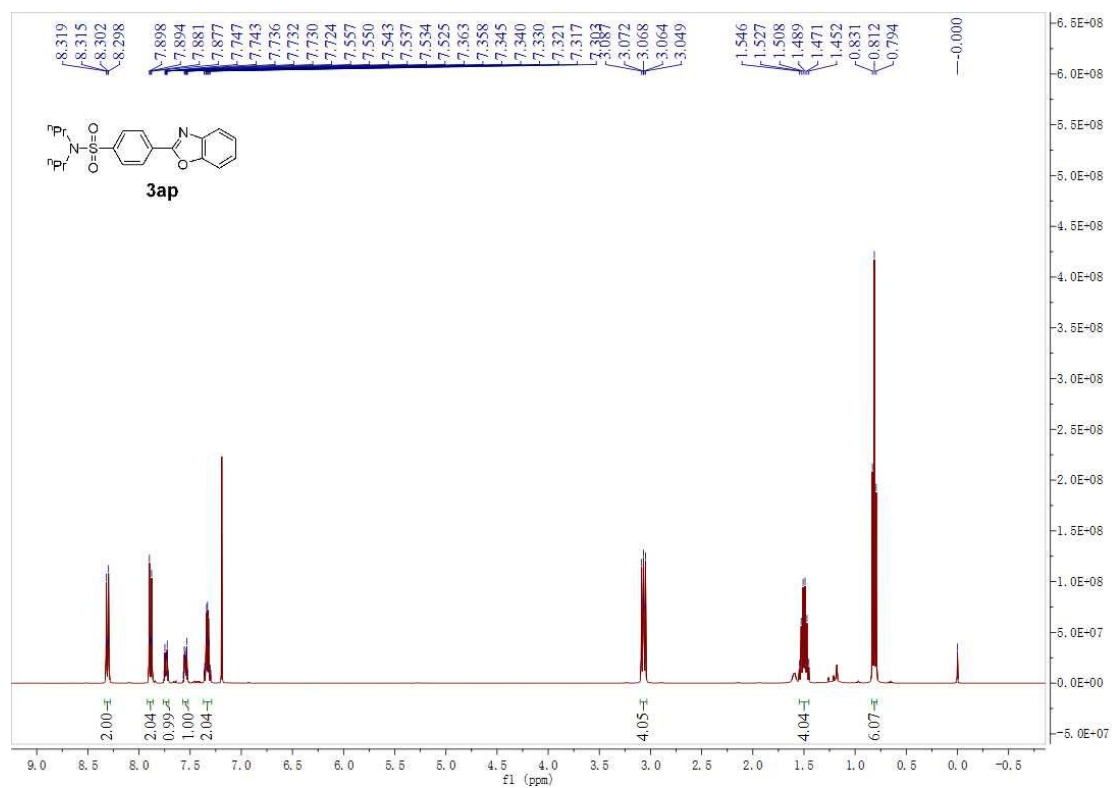

$^{13}\text{C}$  NMR (100 MHz,  $\text{CDCl}_3$ )

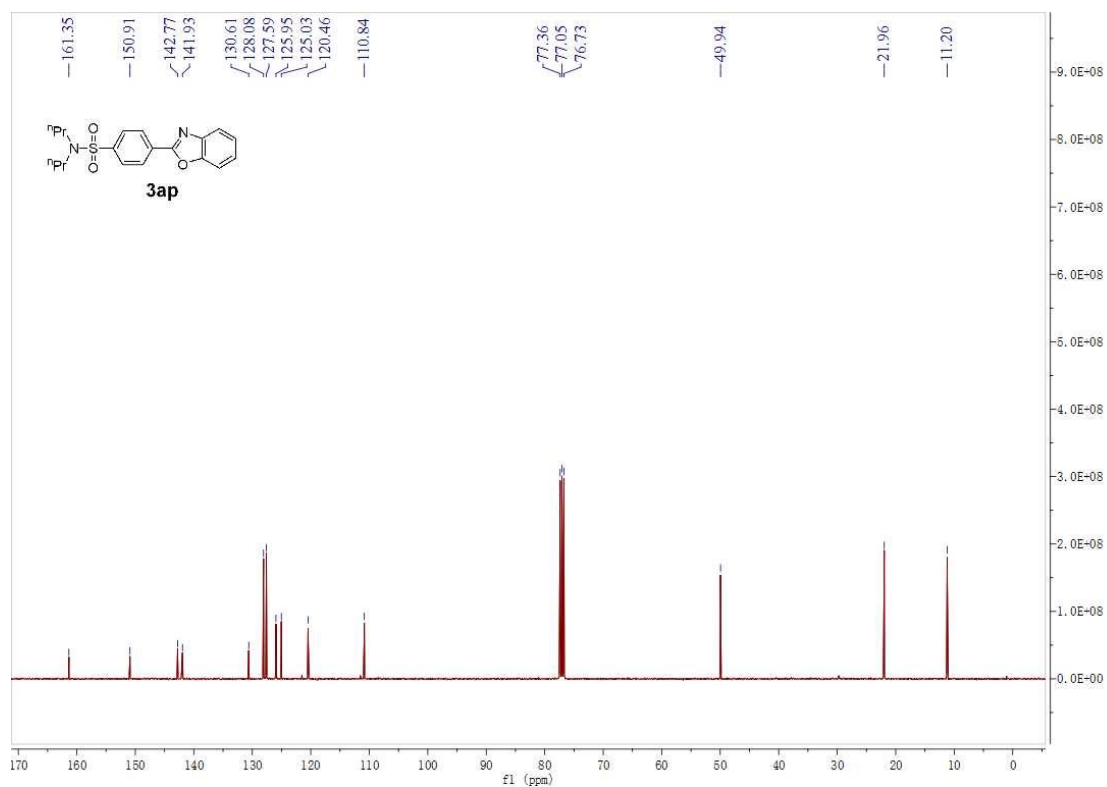

$^1\text{H}$  NMR (400 MHz,  $\text{CDCl}_3$ )

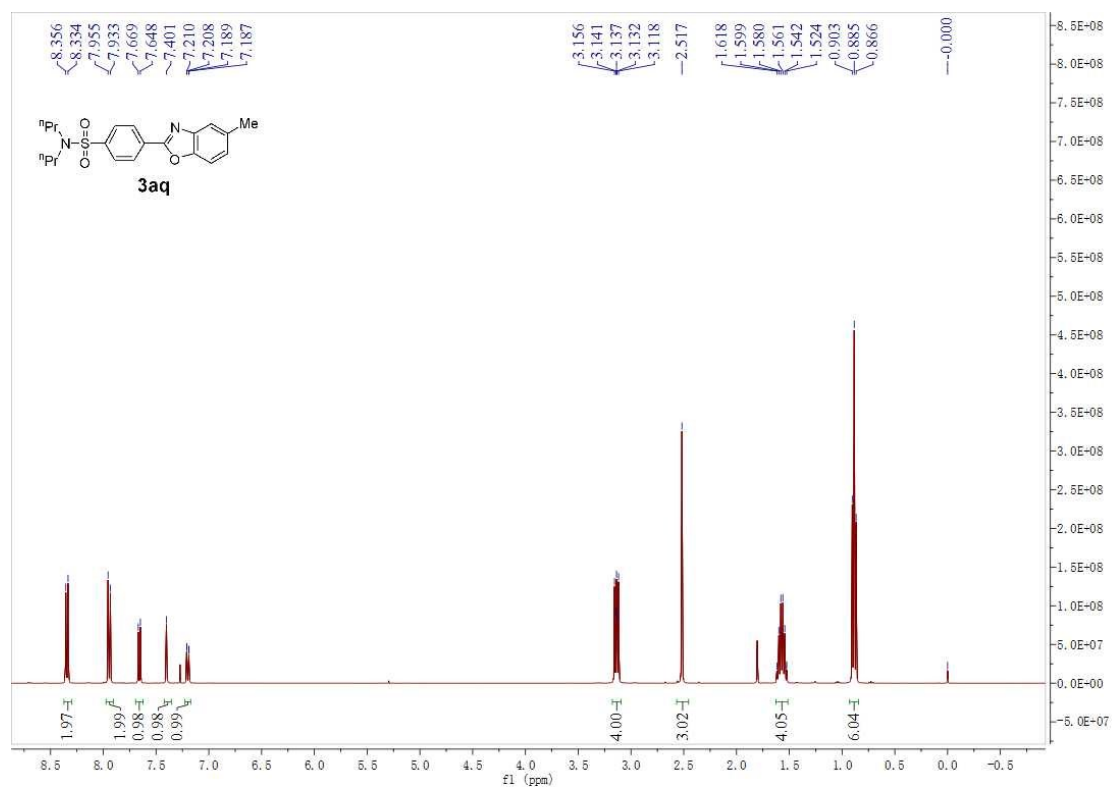

$^{13}\text{C}$  NMR (100 MHz,  $\text{CDCl}_3$ )

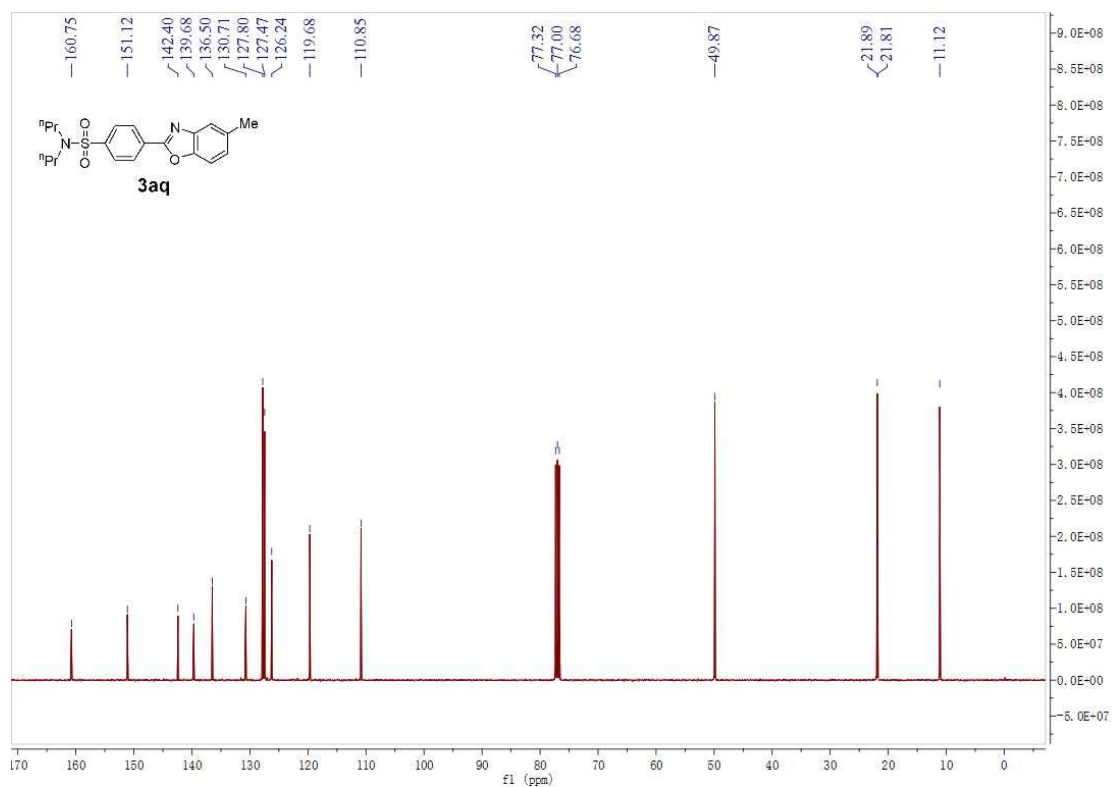

$^1\text{H}$  NMR (400 MHz,  $\text{CDCl}_3$ )

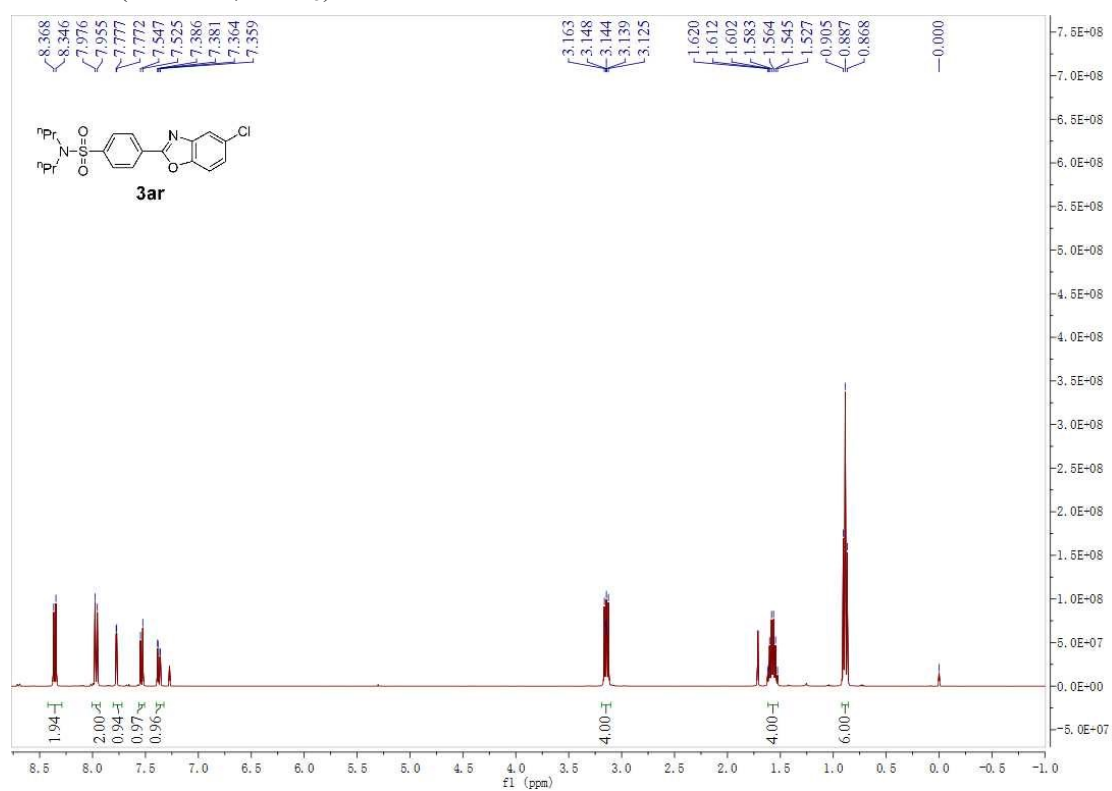

<sup>13</sup>C NMR (100 MHz, CDCl<sub>3</sub>)

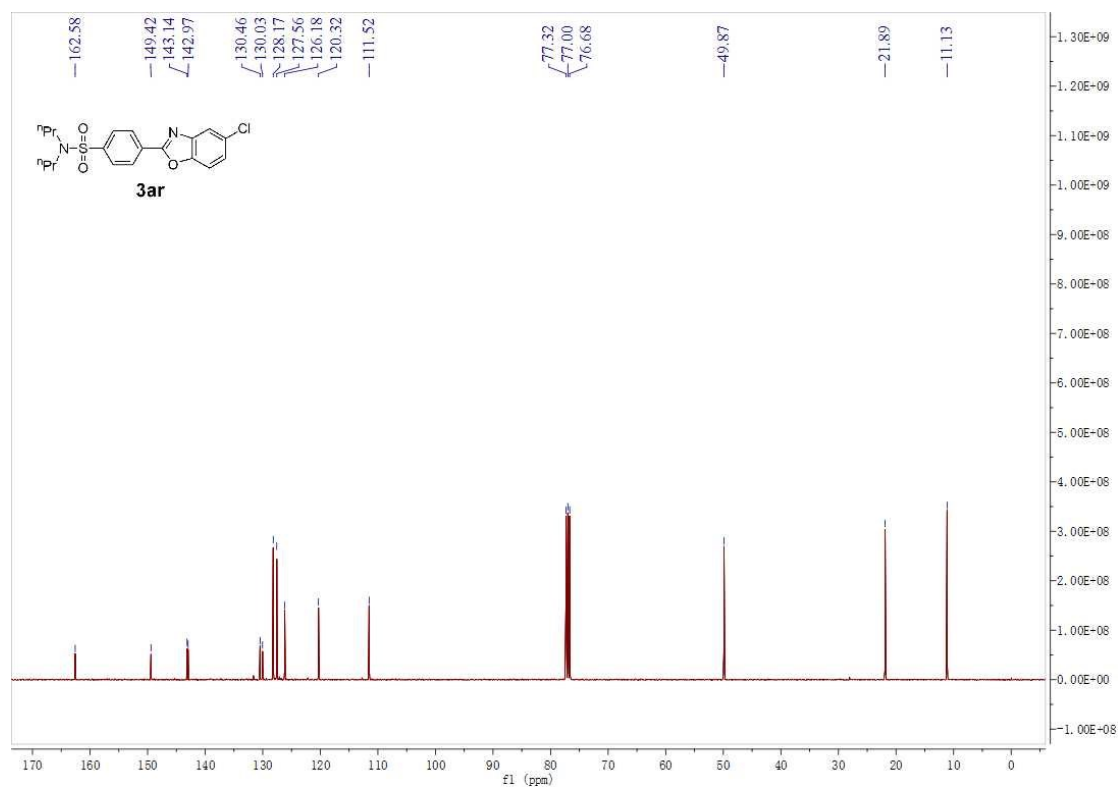

<sup>1</sup>H NMR (400 MHz, CDCl<sub>3</sub>)

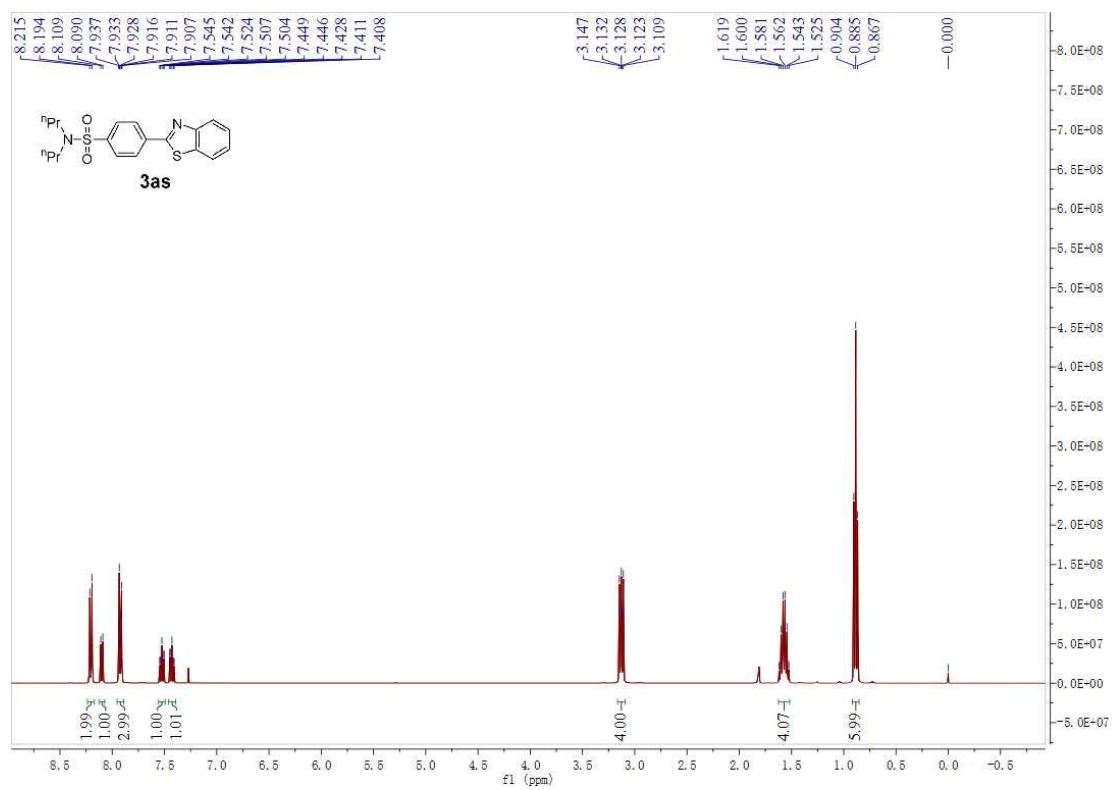

$^{13}\text{C}$  NMR (100 MHz,  $\text{CDCl}_3$ )

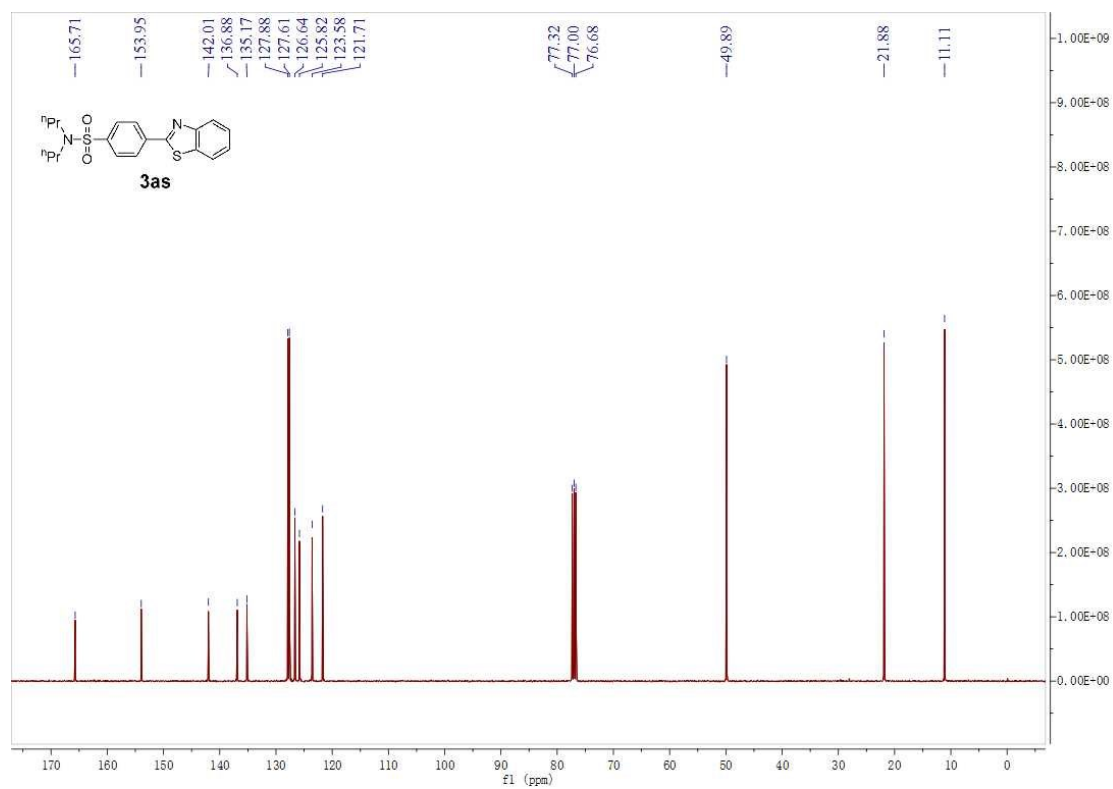

$^1\text{H}$  NMR (400 MHz,  $\text{CDCl}_3$ )

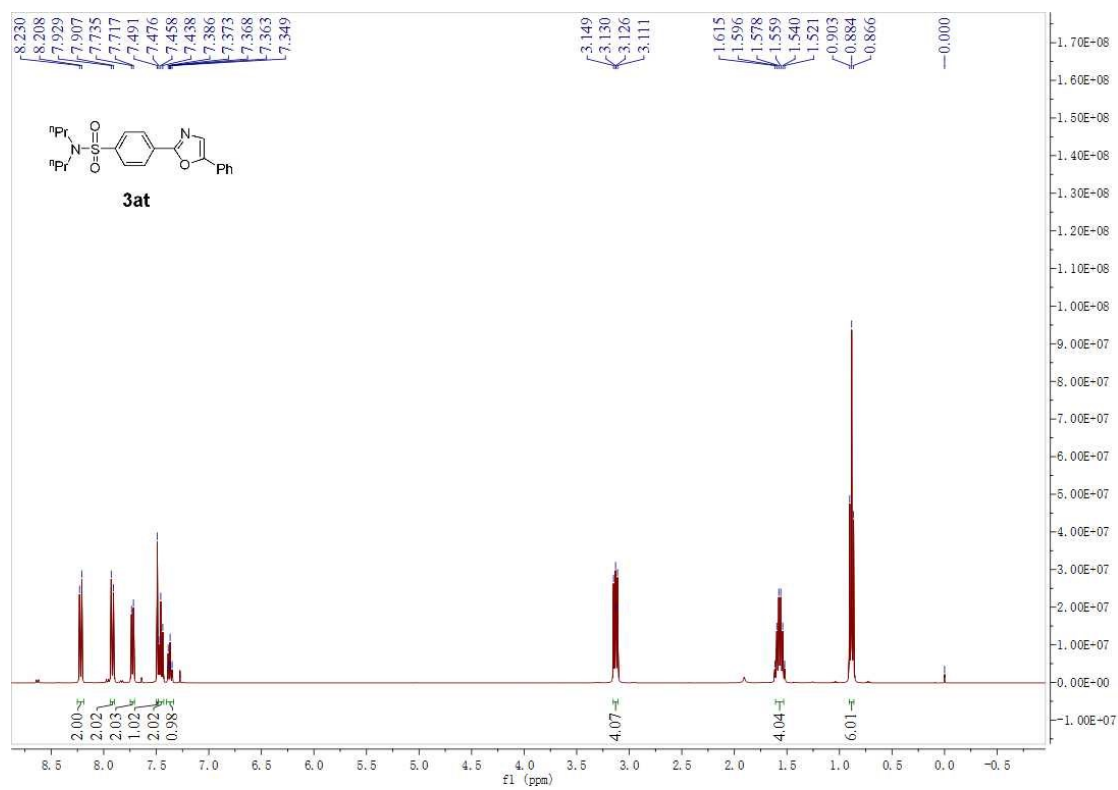

$^{13}\text{C}$  NMR (100 MHz,  $\text{CDCl}_3$ )

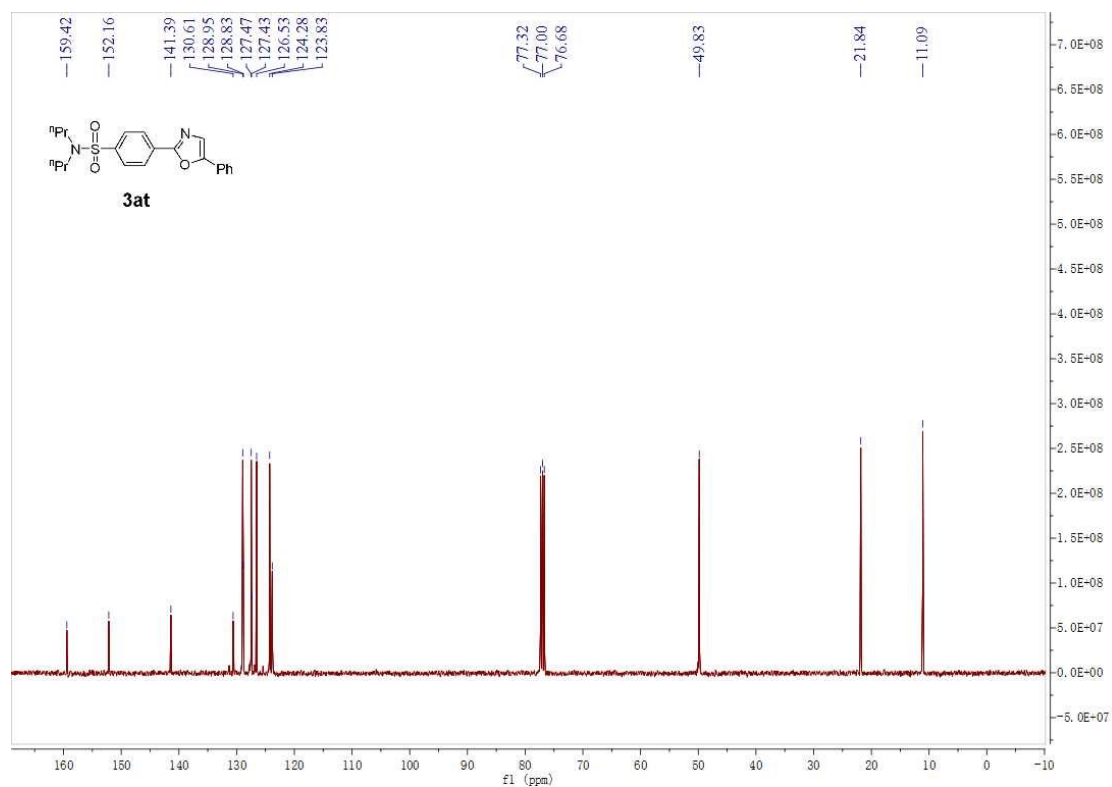

$^1\text{H}$  NMR (400 MHz,  $\text{CDCl}_3$ )

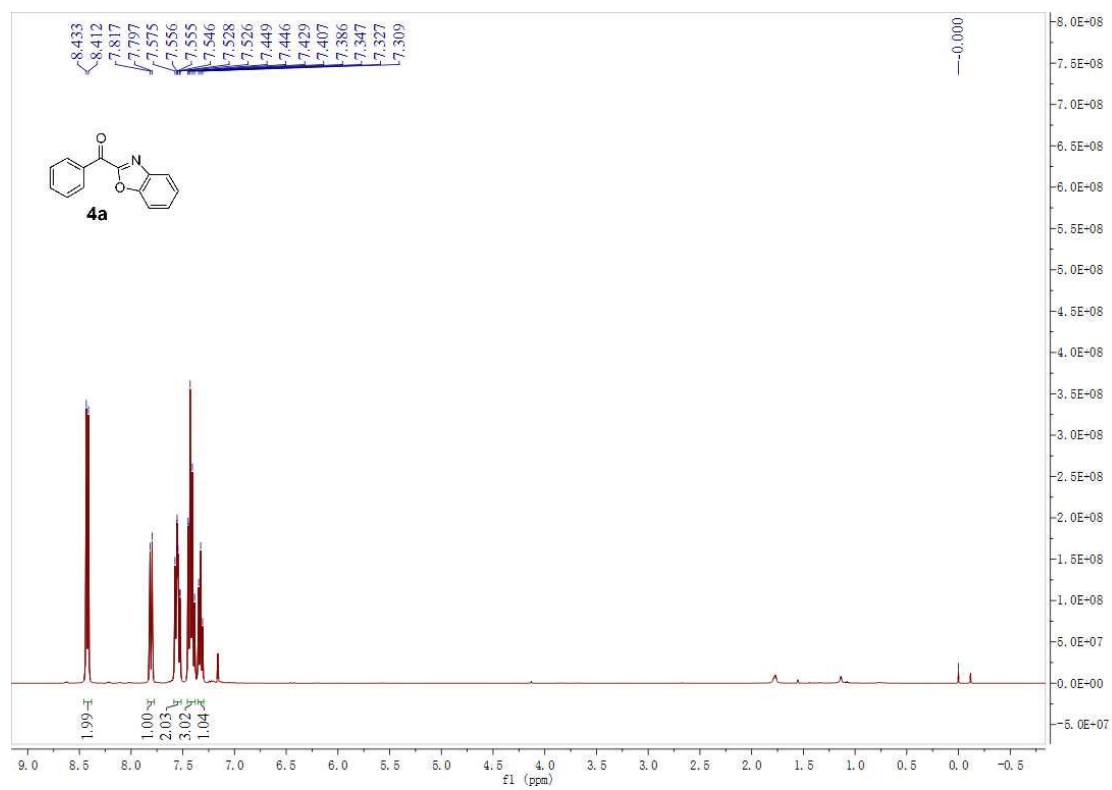



$^{13}\text{C}$  NMR (100 MHz,  $\text{CDCl}_3$ )

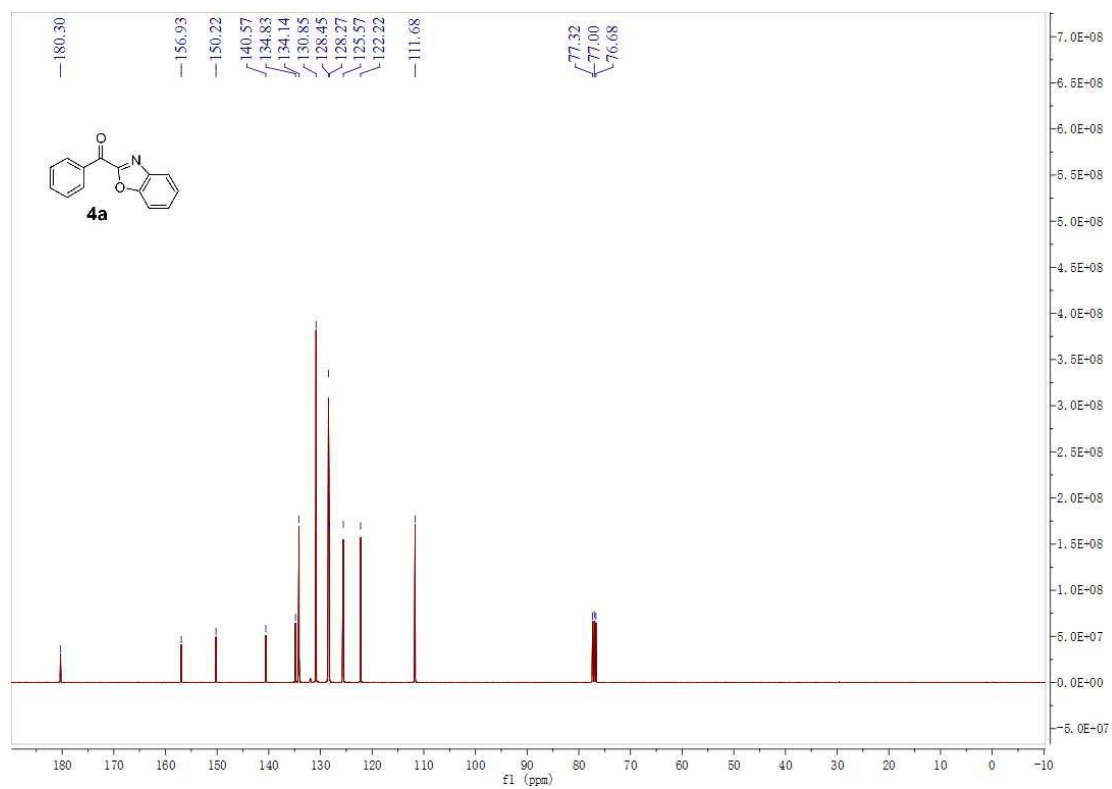

$^1\text{H}$  NMR (400 MHz,  $\text{CDCl}_3$ )

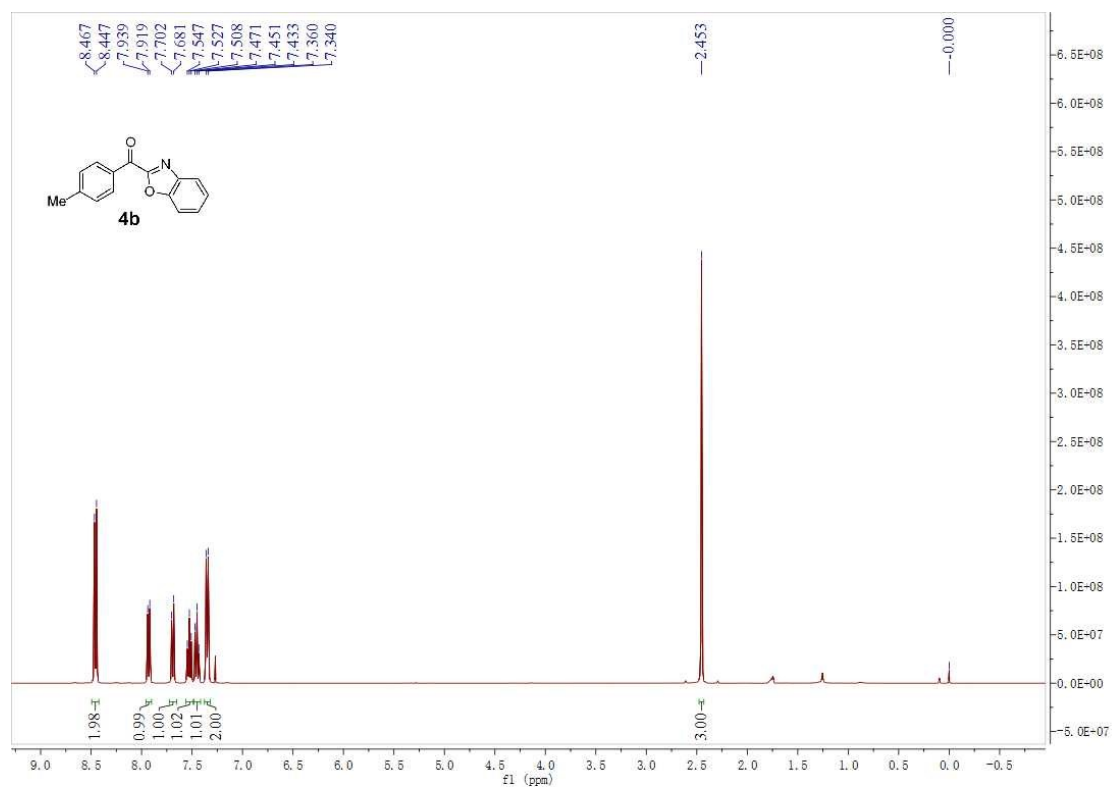

$^{13}\text{C}$  NMR (100 MHz,  $\text{CDCl}_3$ )

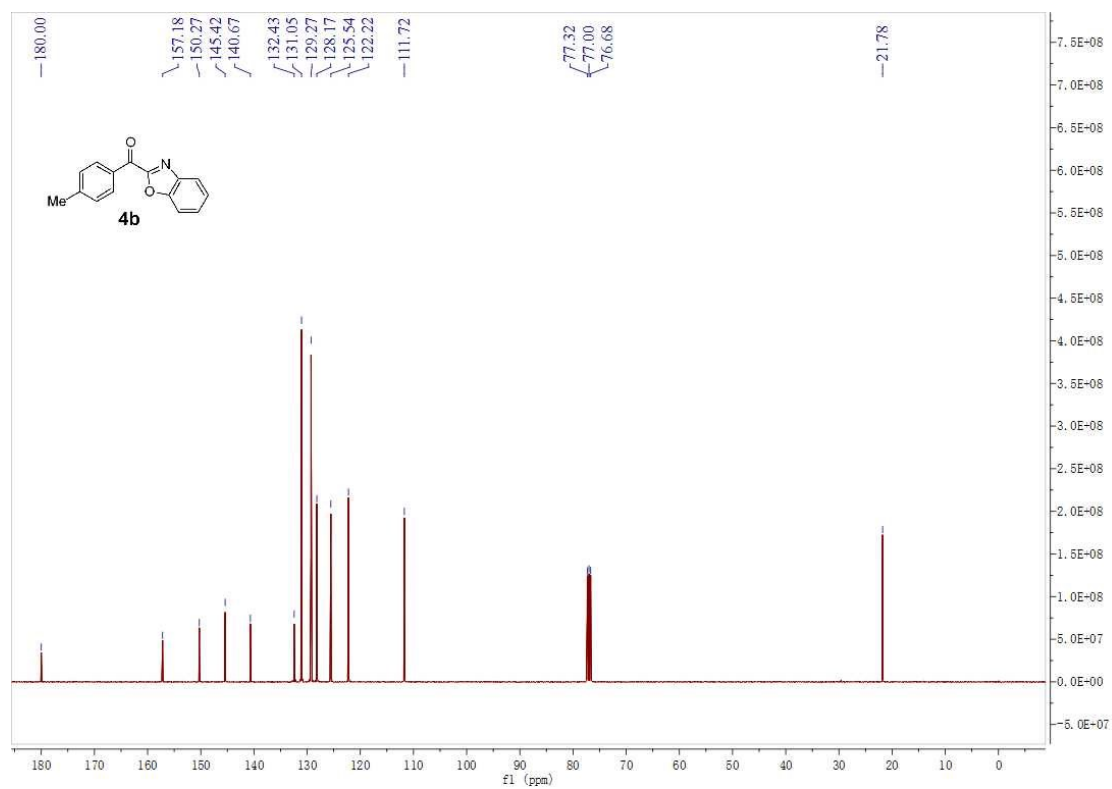

$^1\text{H}$  NMR (400 MHz,  $\text{CDCl}_3$ )

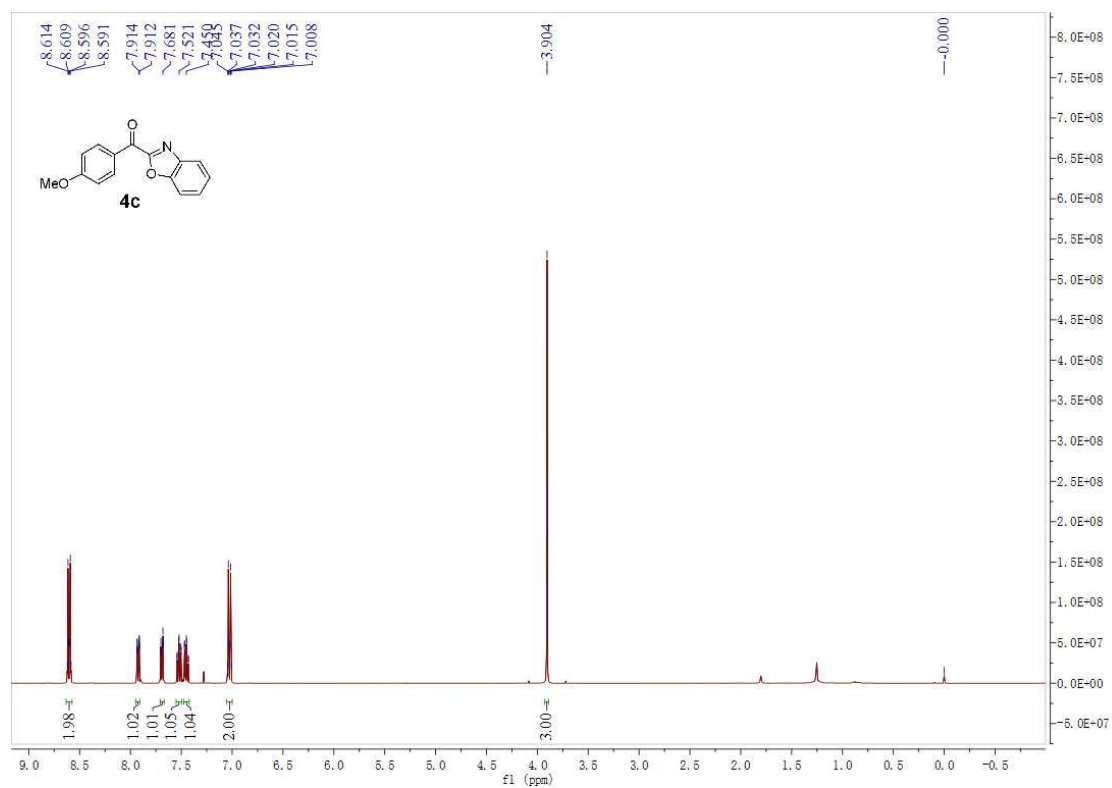

<sup>13</sup>C NMR (100 MHz, CDCl<sub>3</sub>)

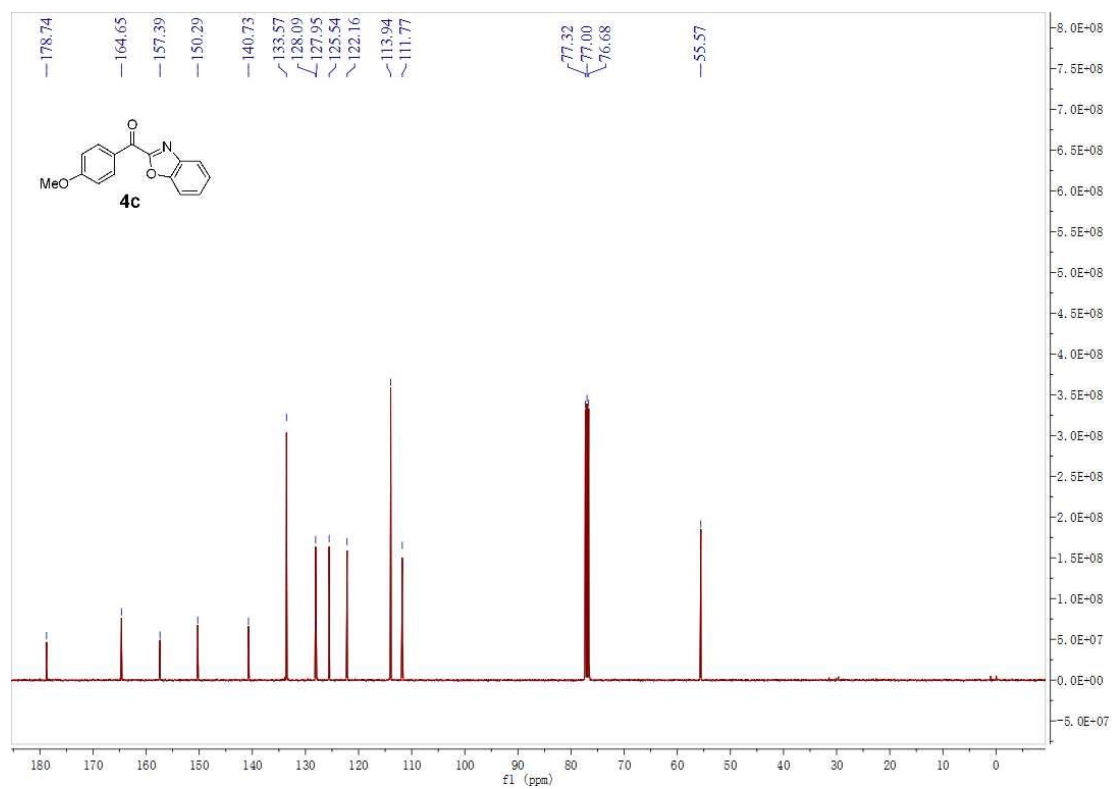

<sup>1</sup>H NMR (400 MHz, CDCl<sub>3</sub>)

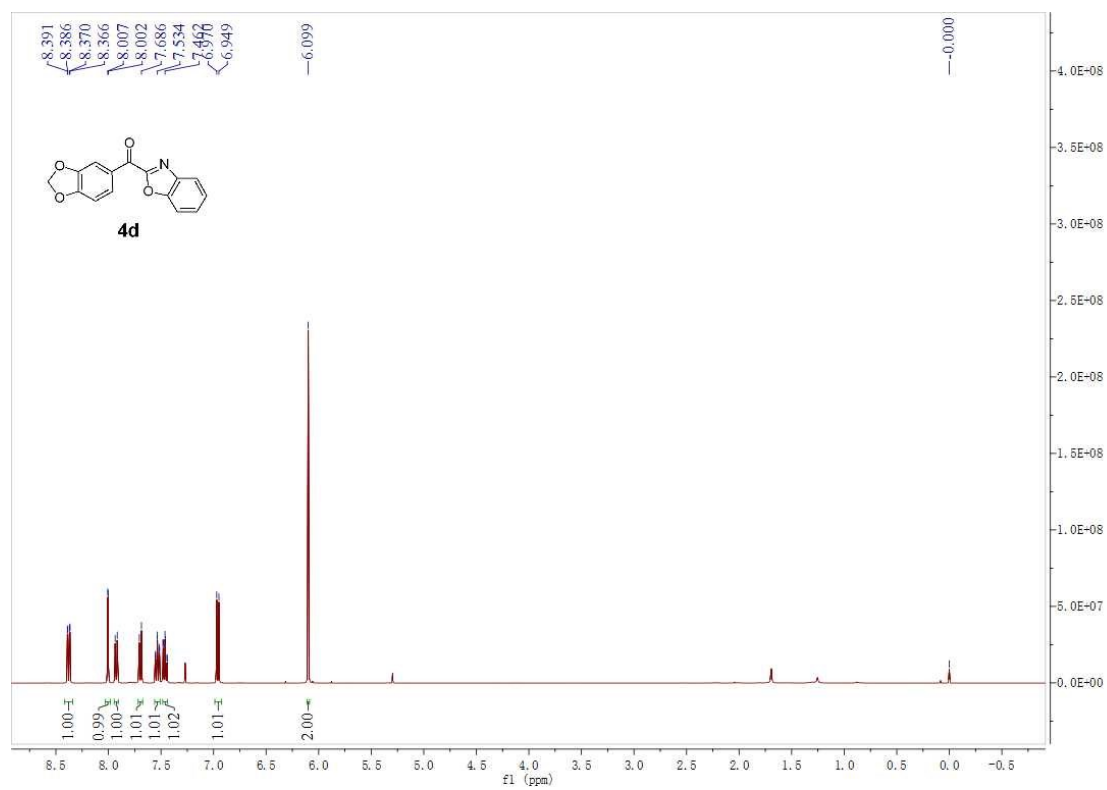

$^{13}\text{C}$  NMR (100 MHz,  $\text{CDCl}_3$ )

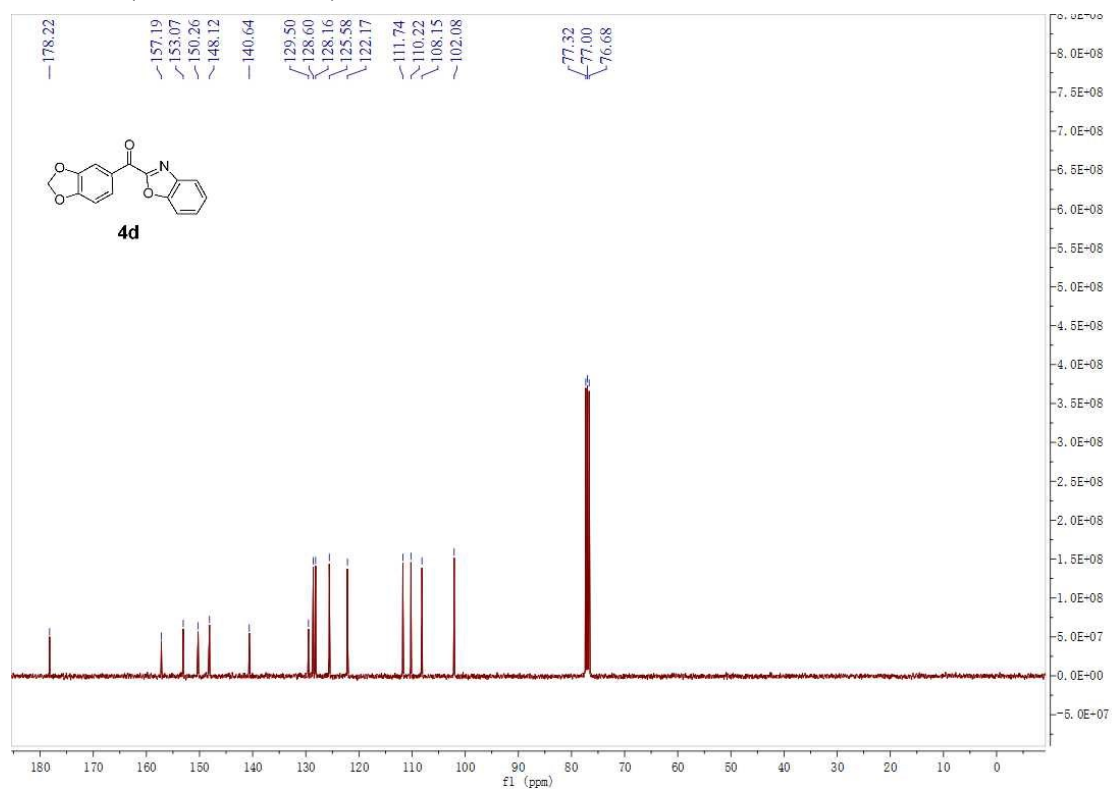

$^1\text{H}$  NMR (400 MHz,  $\text{CDCl}_3$ )

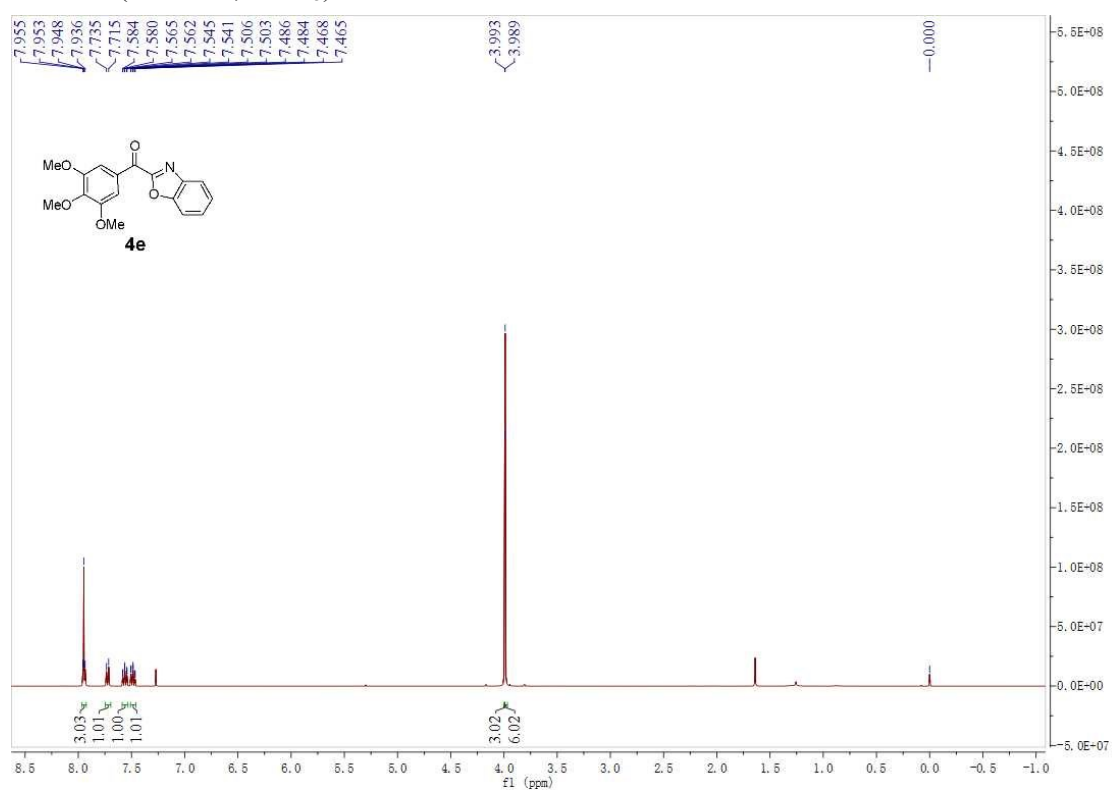

$^{13}\text{C}$  NMR (100 MHz,  $\text{CDCl}_3$ )

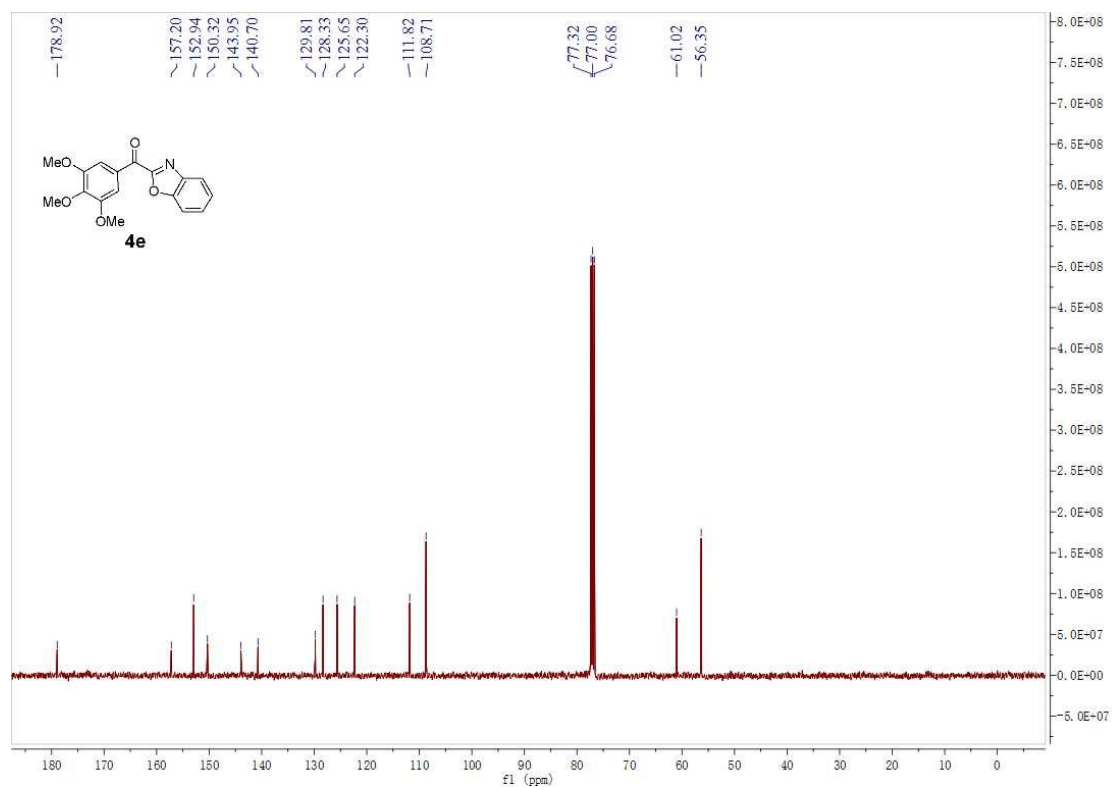

$^1\text{H}$  NMR (400 MHz,  $\text{CDCl}_3$ )

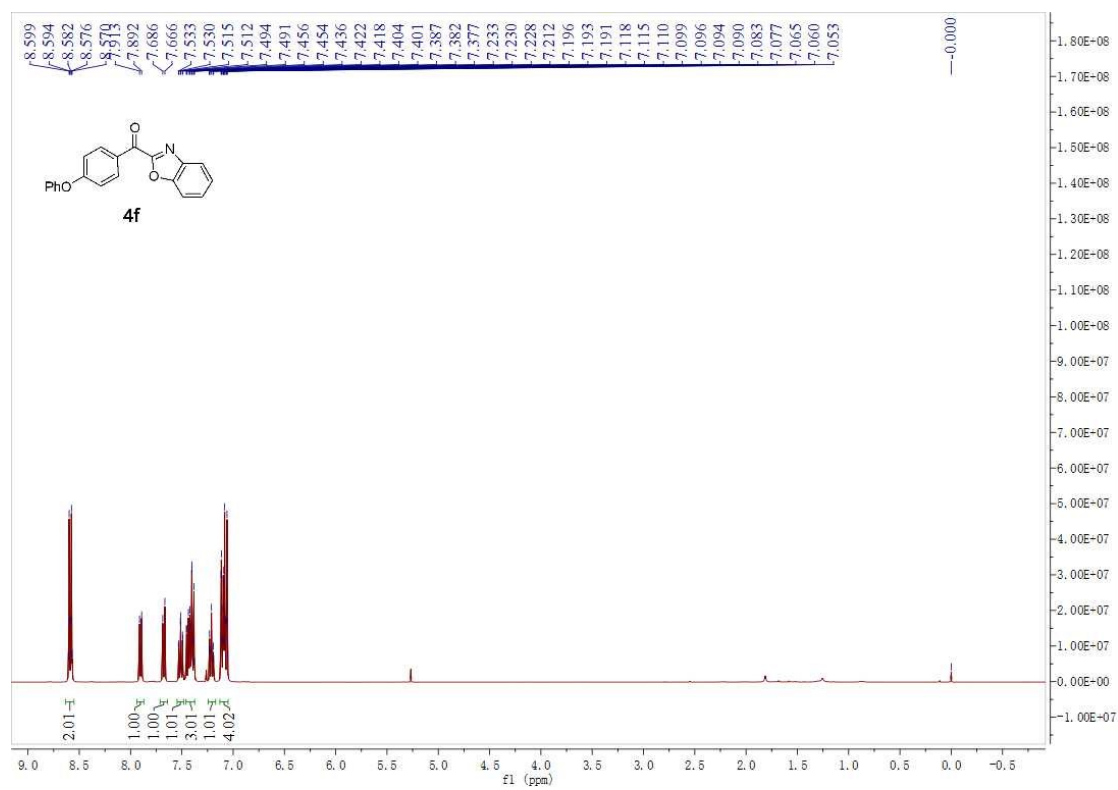

$^{13}\text{C}$  NMR (100 MHz,  $\text{CDCl}_3$ )

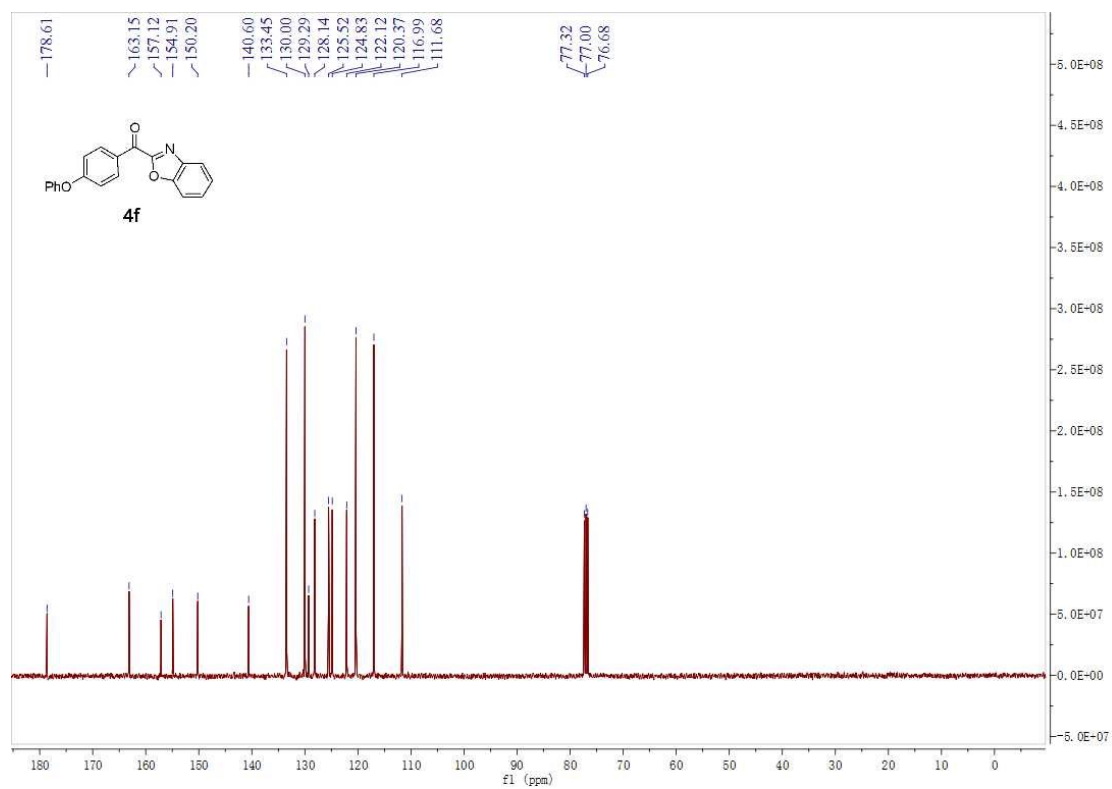

$^1\text{H}$  NMR (400 MHz,  $\text{CDCl}_3$ )

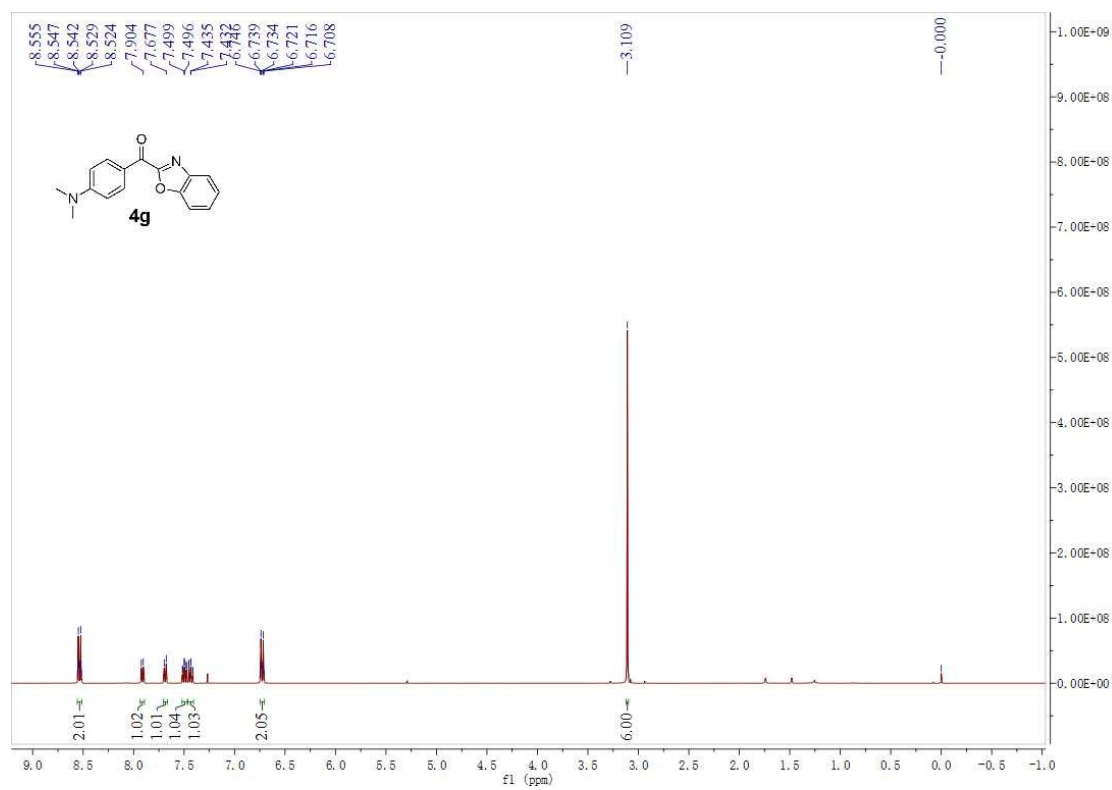

$^{13}\text{C}$  NMR (100 MHz,  $\text{CDCl}_3$ )

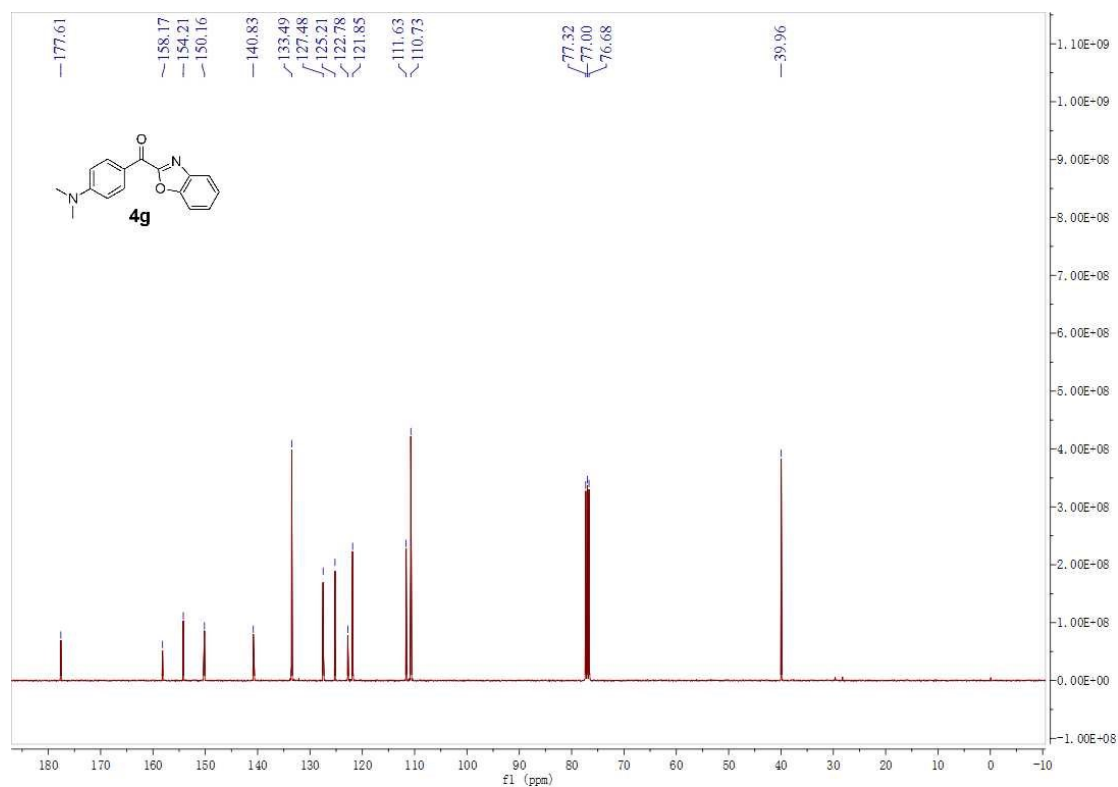

$^1\text{H}$  NMR (400 MHz,  $\text{CDCl}_3$ )

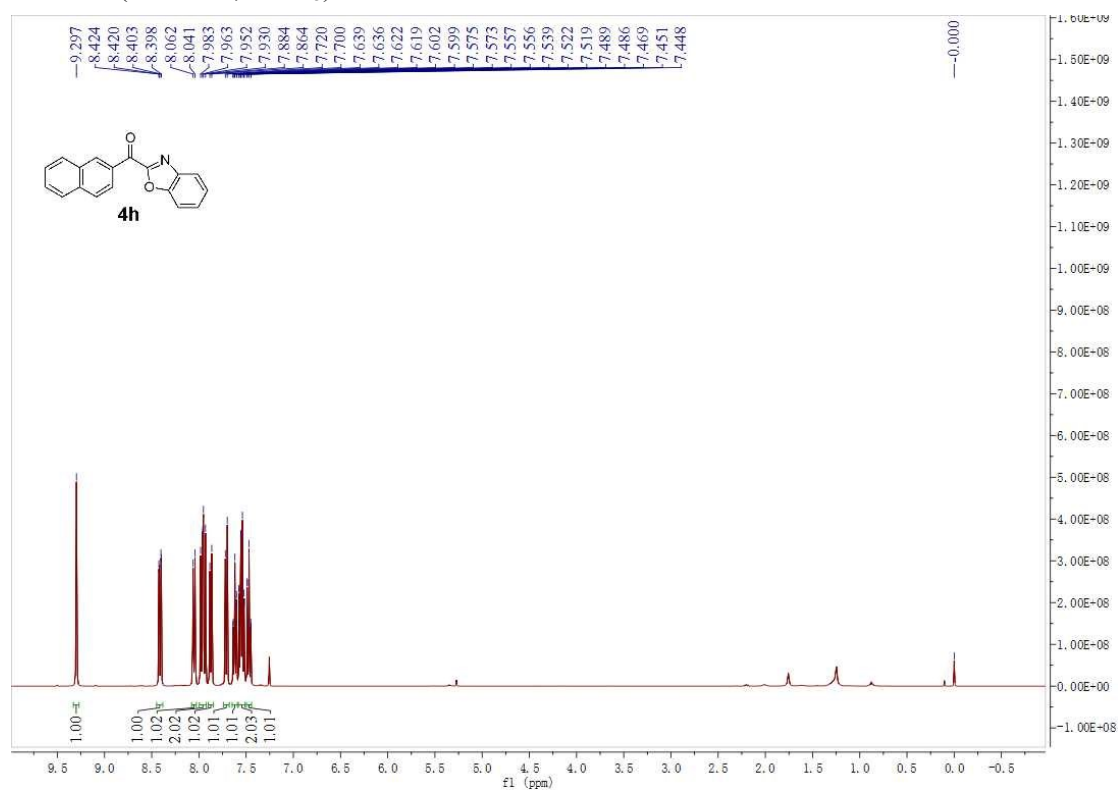

<sup>13</sup>C NMR (100 MHz, CDCl<sub>3</sub>)

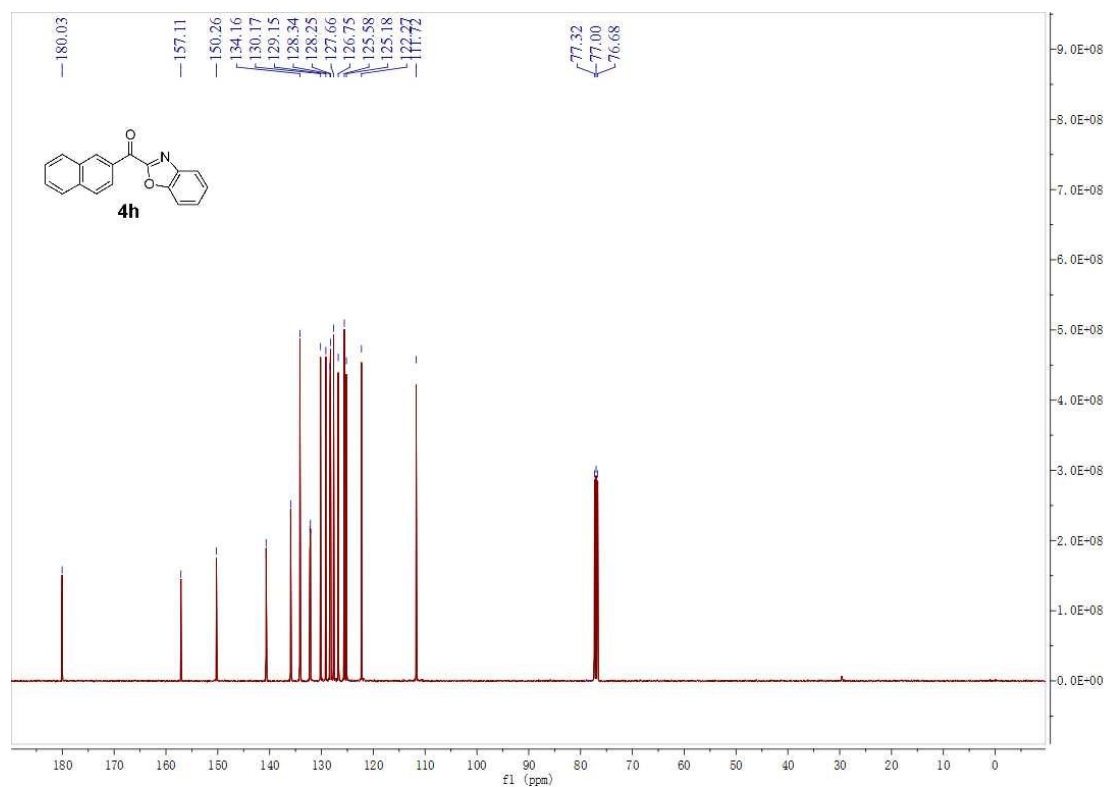

<sup>1</sup>H NMR (400 MHz, CDCl<sub>3</sub>)

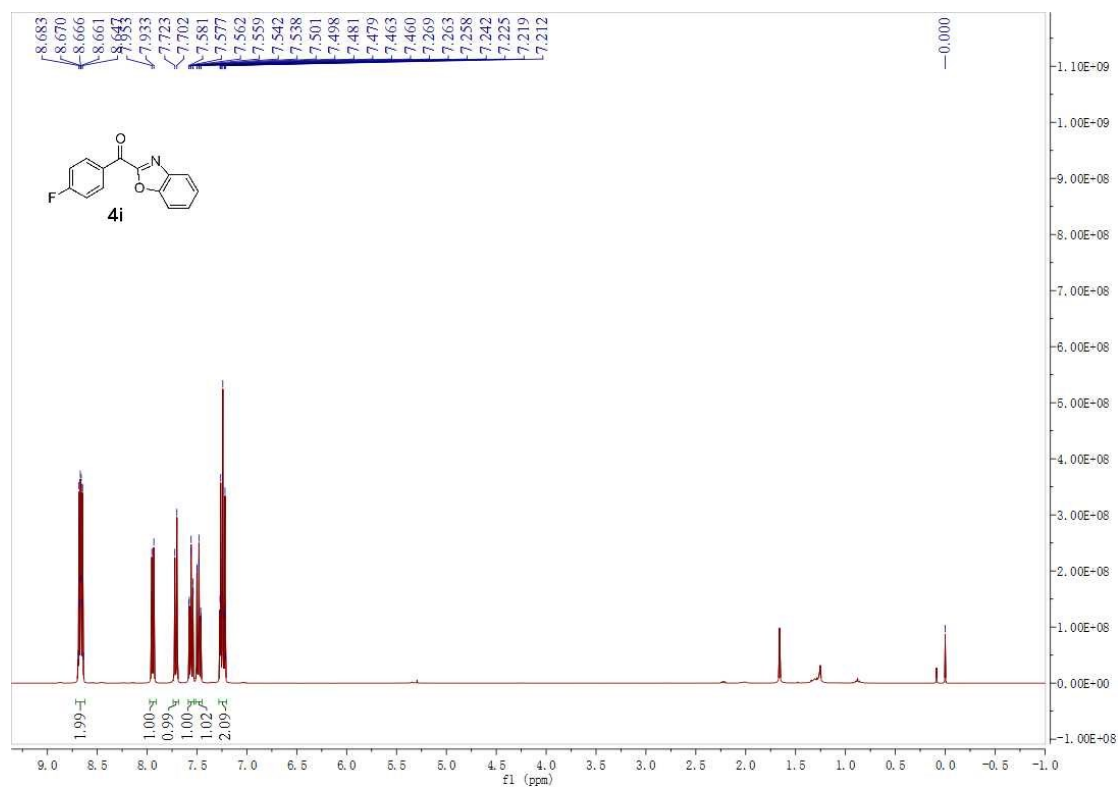



<sup>13</sup>C NMR (100 MHz, CDCl<sub>3</sub>)

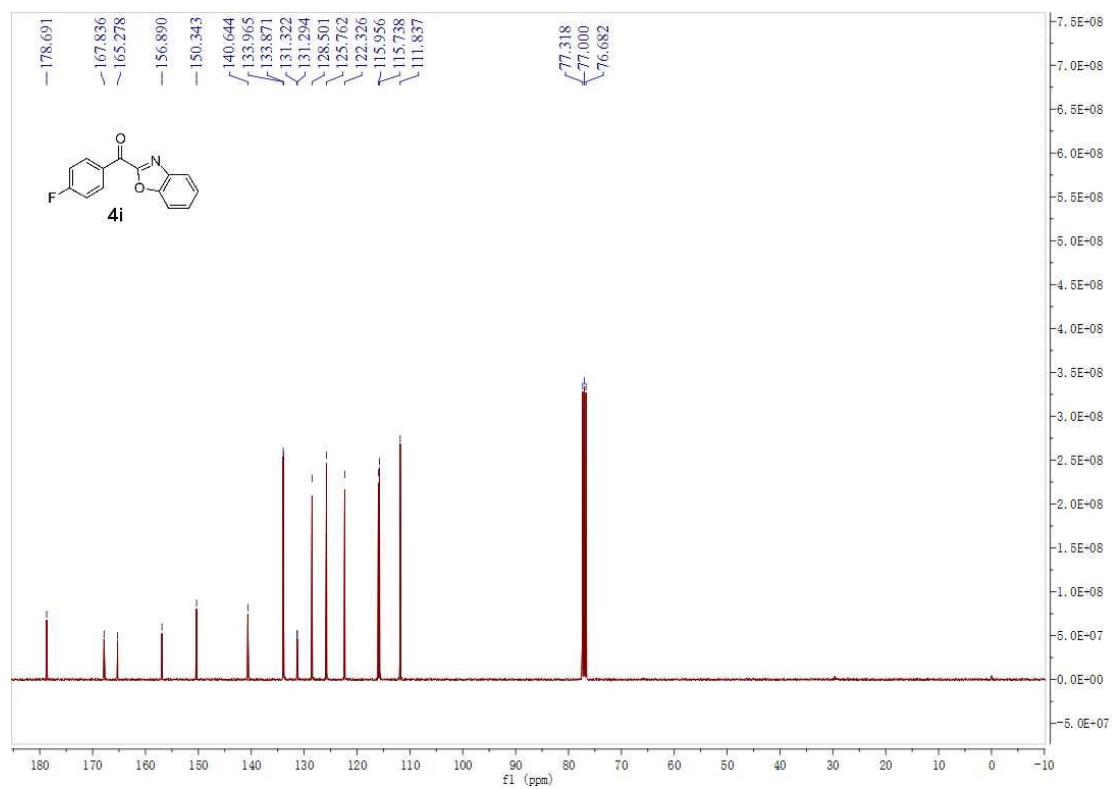

<sup>19</sup>F NMR (376 MHz, CDCl<sub>3</sub>)

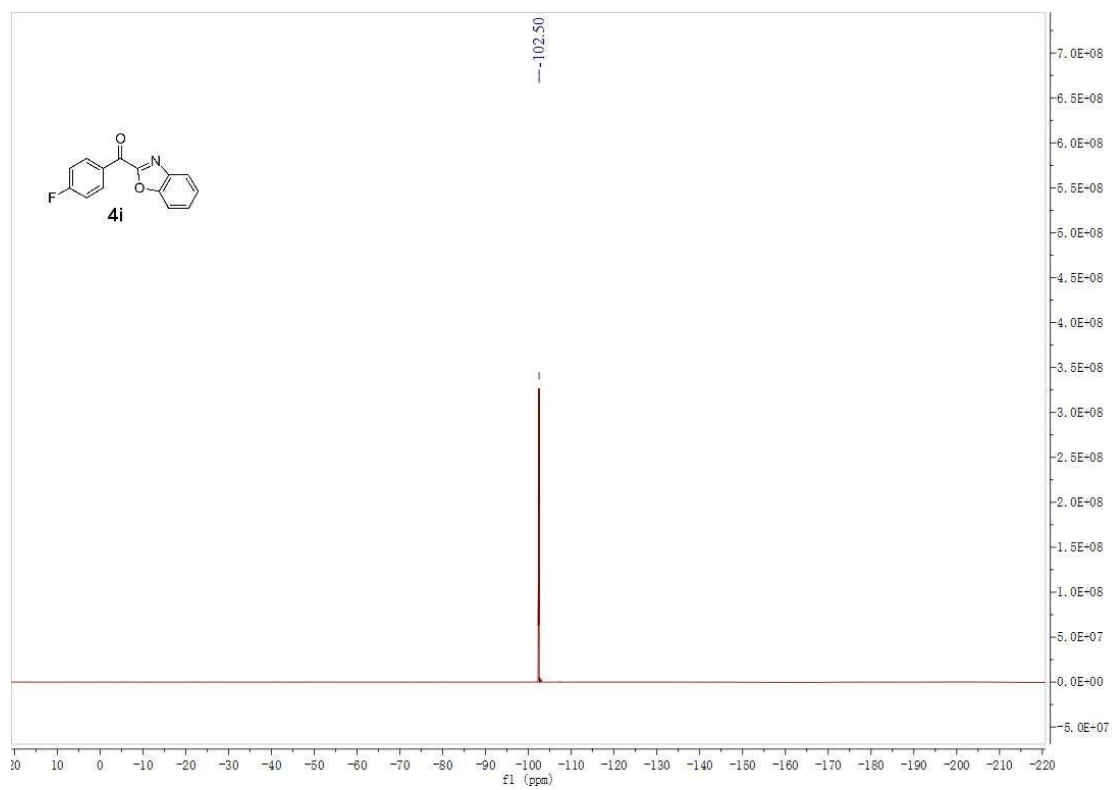

<sup>1</sup>H NMR (400 MHz, CDCl<sub>3</sub>)

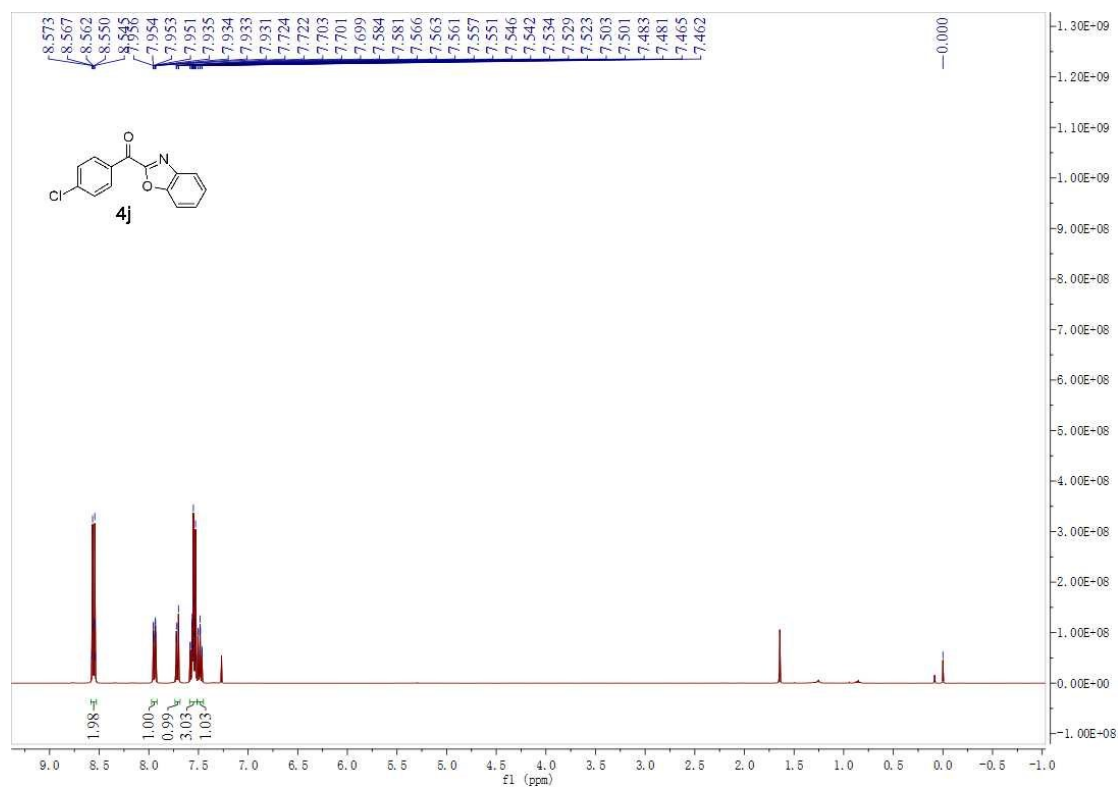

<sup>13</sup>C NMR (100 MHz, CDCl<sub>3</sub>)

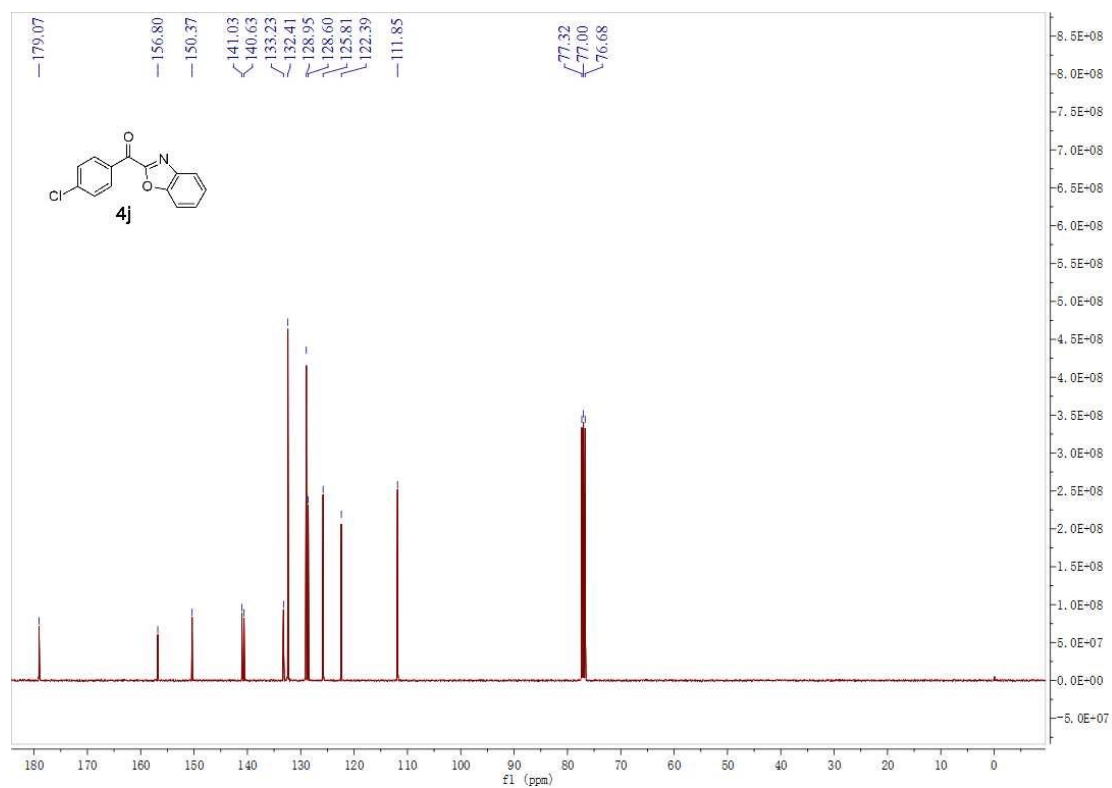

<sup>1</sup>H NMR (400 MHz, CDCl<sub>3</sub>)

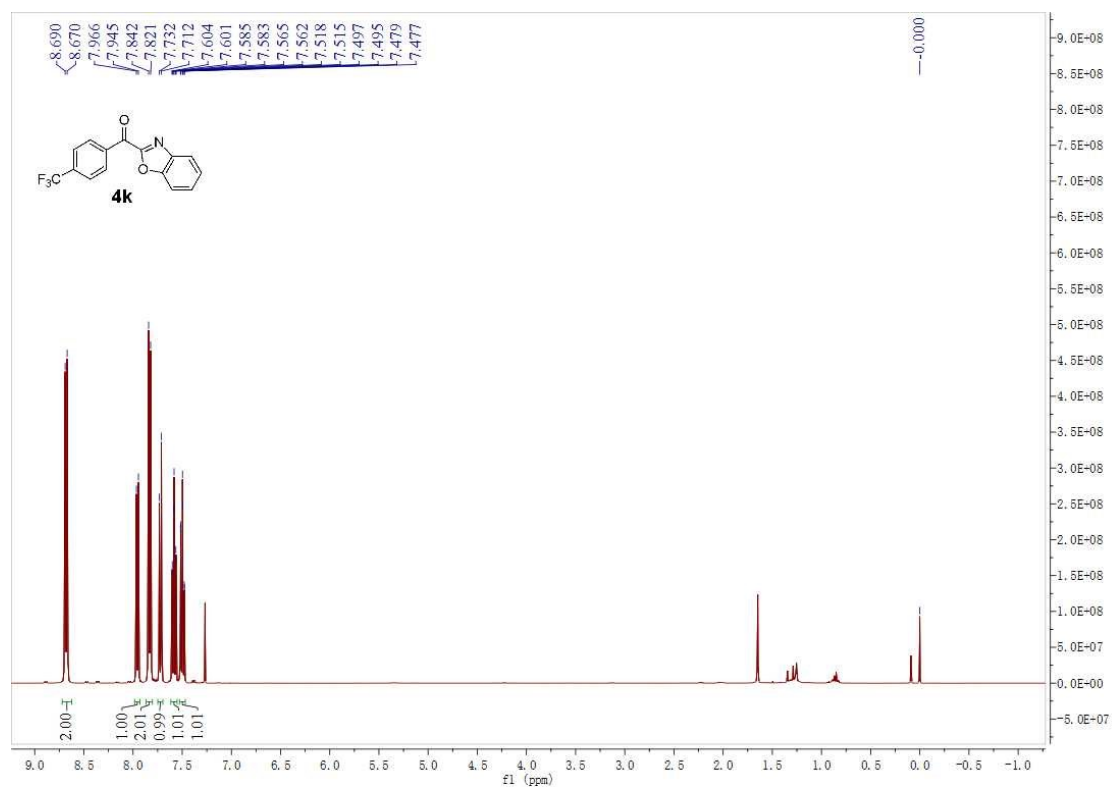

<sup>13</sup>C NMR (100 MHz, CDCl<sub>3</sub>)

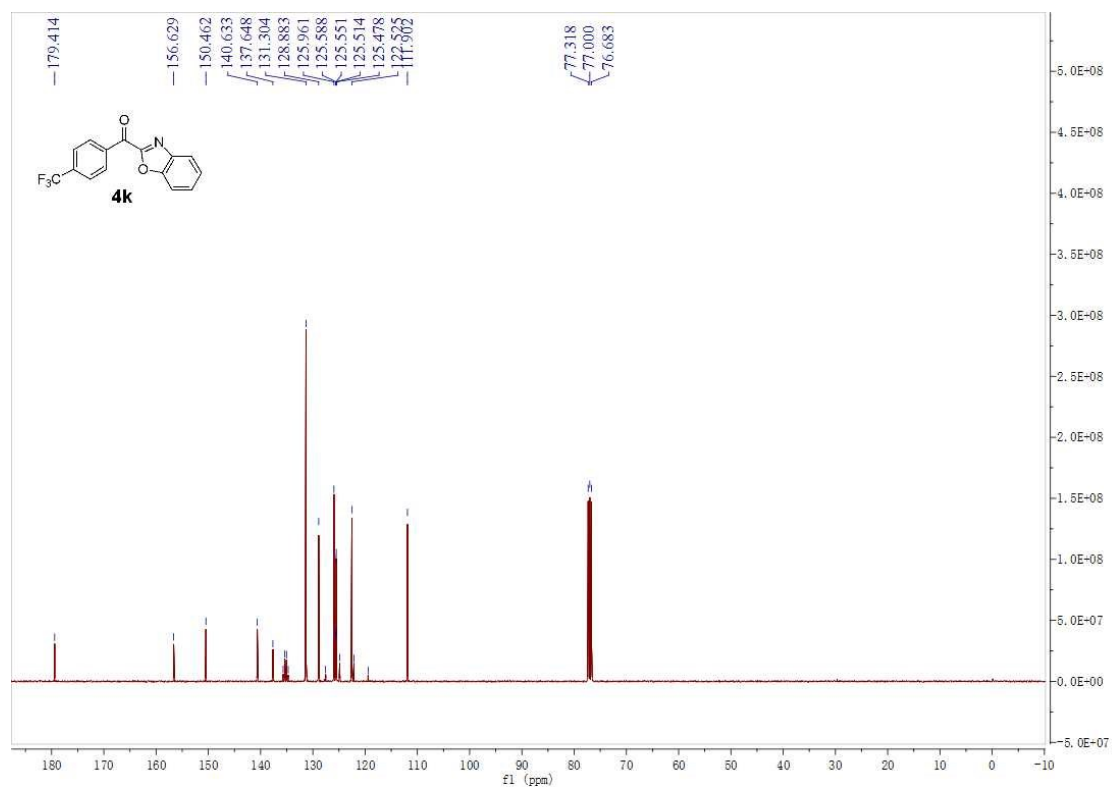

$^{19}\text{F}$  NMR (376 MHz,  $\text{CDCl}_3$ )

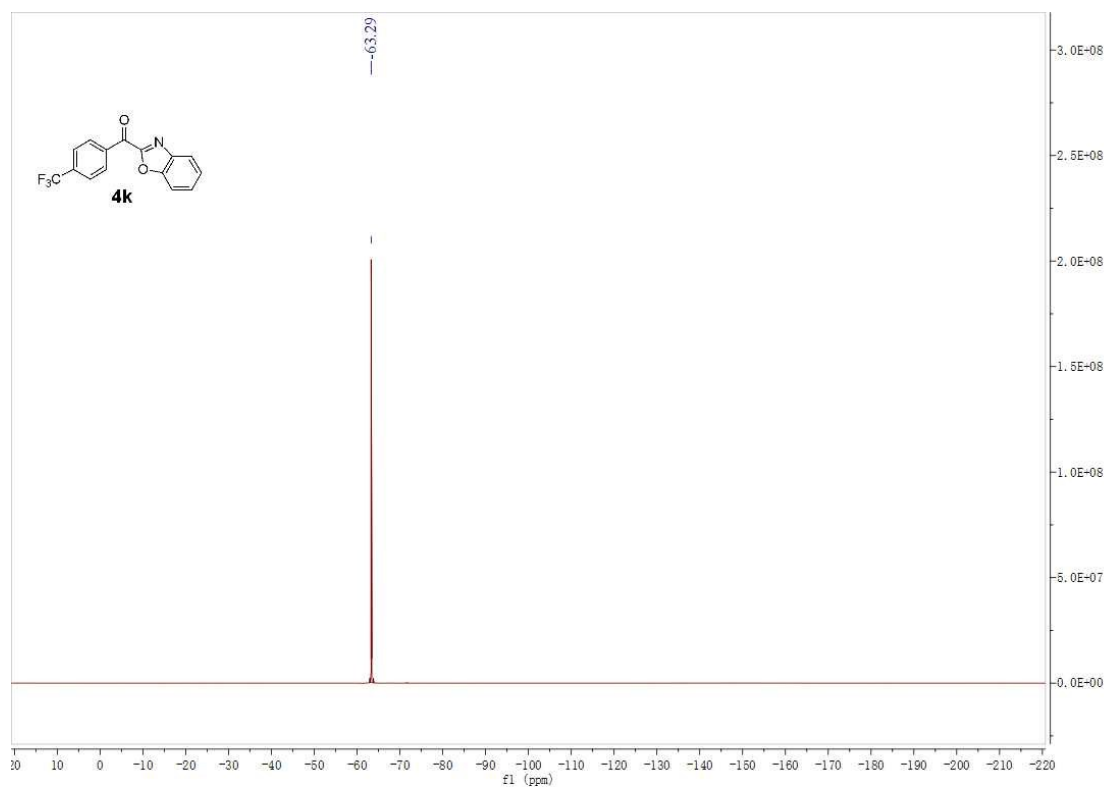

$^1\text{H}$  NMR (400 MHz,  $\text{CDCl}_3$ )

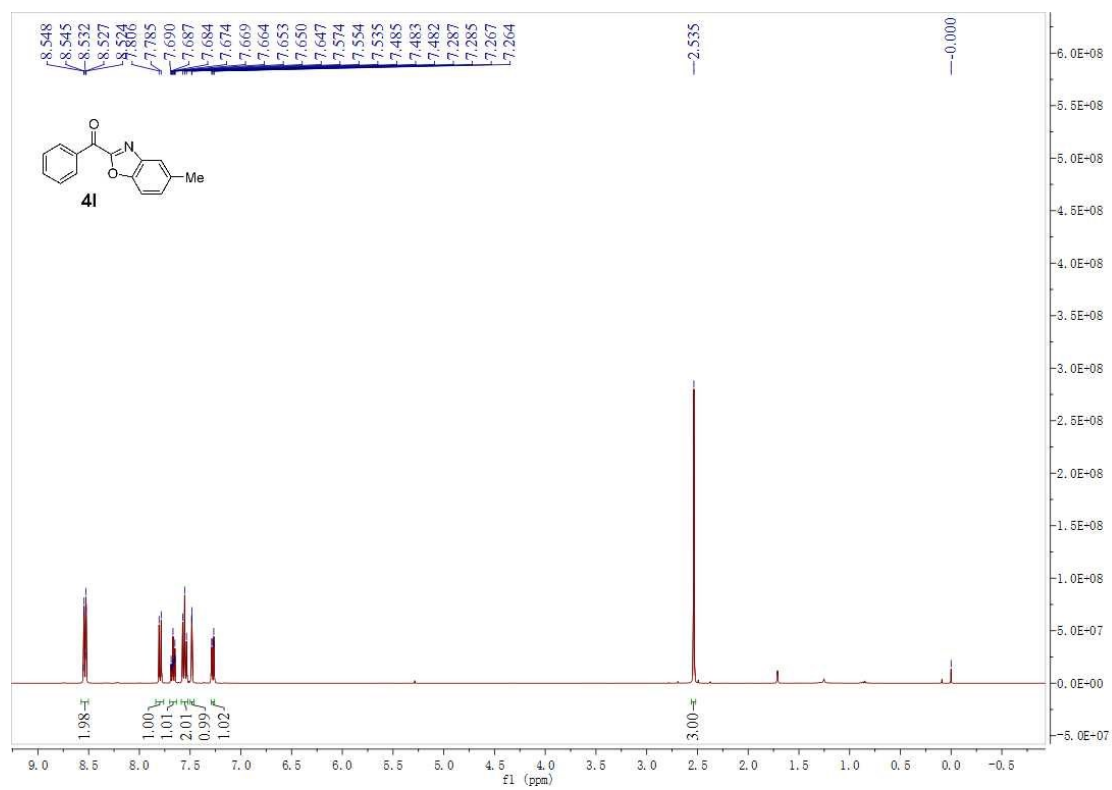

$^{13}\text{C}$  NMR (100 MHz,  $\text{CDCl}_3$ )

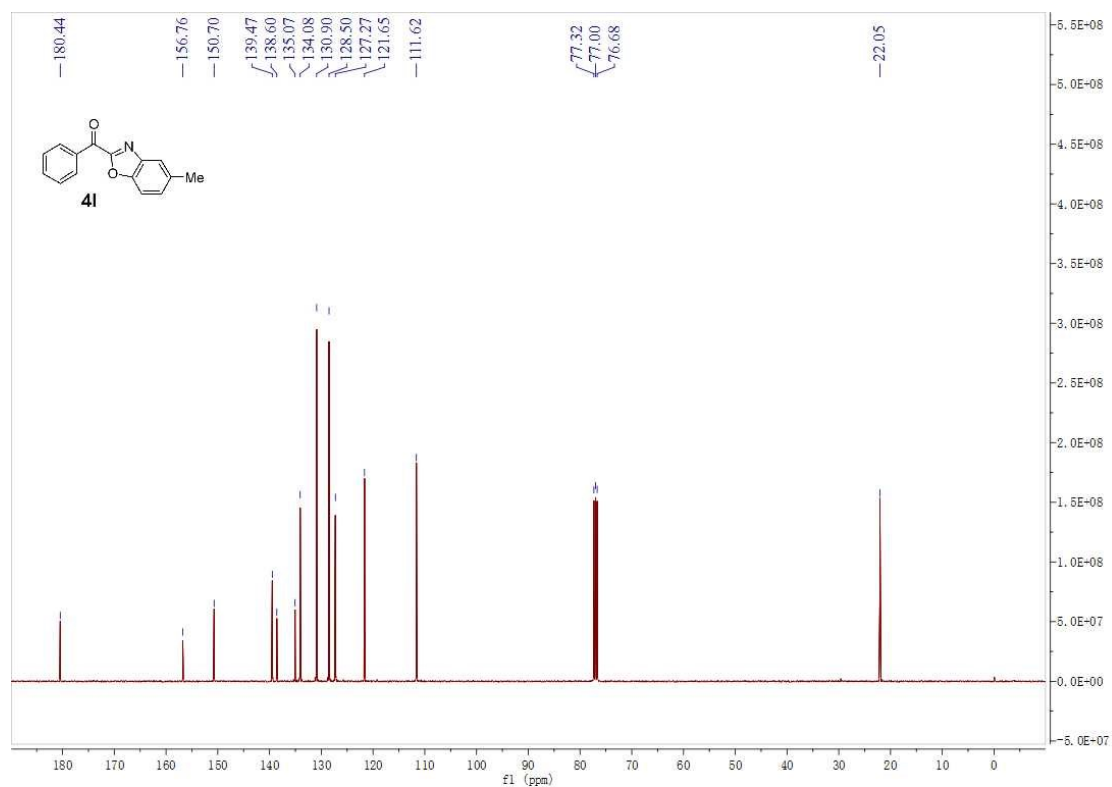

$^1\text{H}$  NMR (400 MHz,  $\text{CDCl}_3$ )

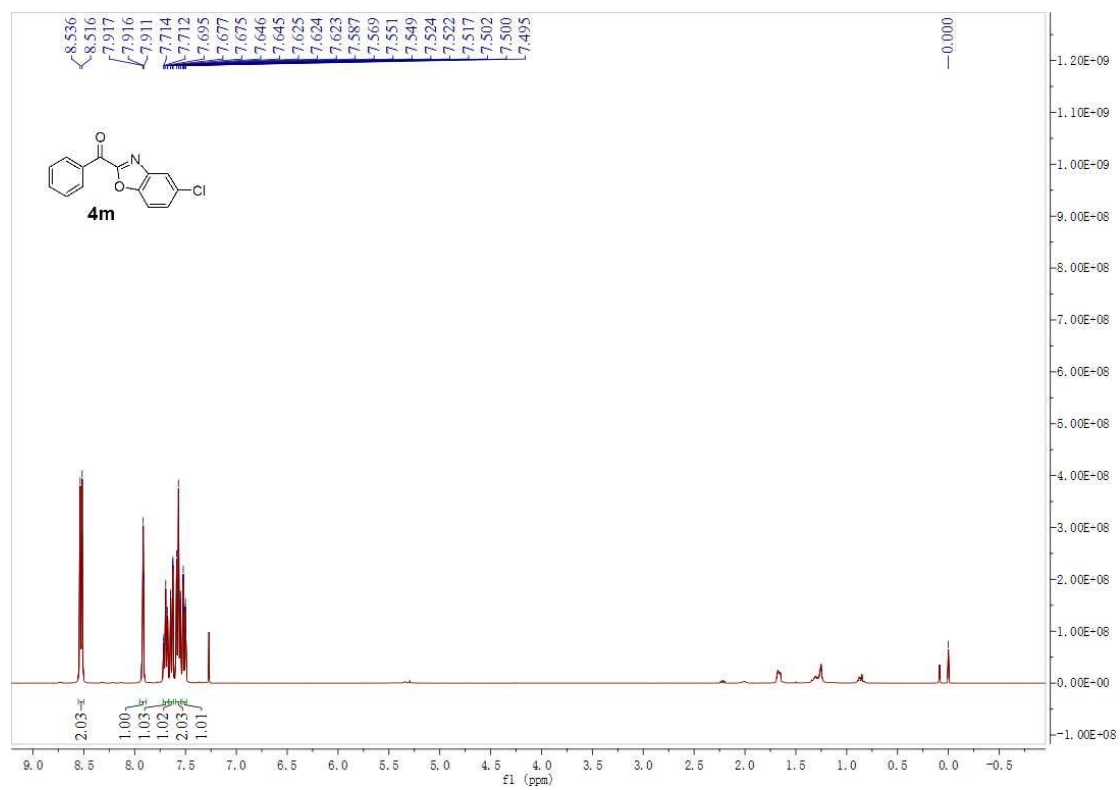

<sup>13</sup>C NMR (100 MHz, CDCl<sub>3</sub>)

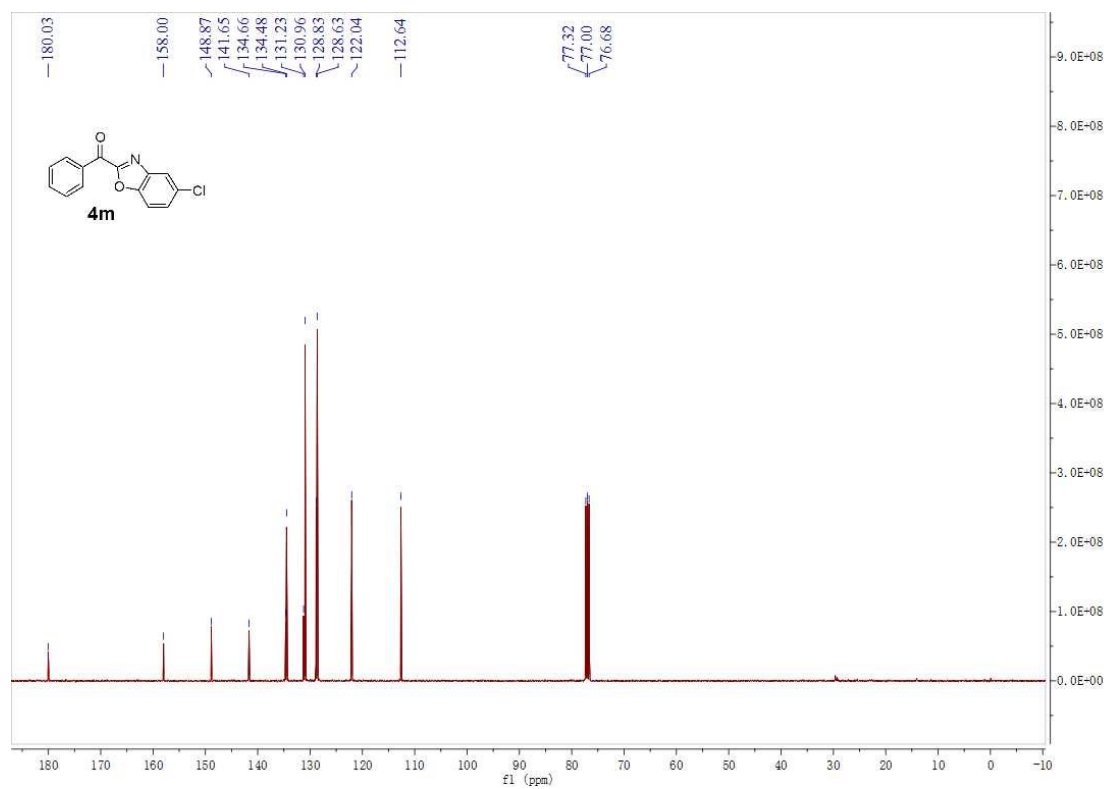

<sup>1</sup>H NMR (400 MHz, CDCl<sub>3</sub>)

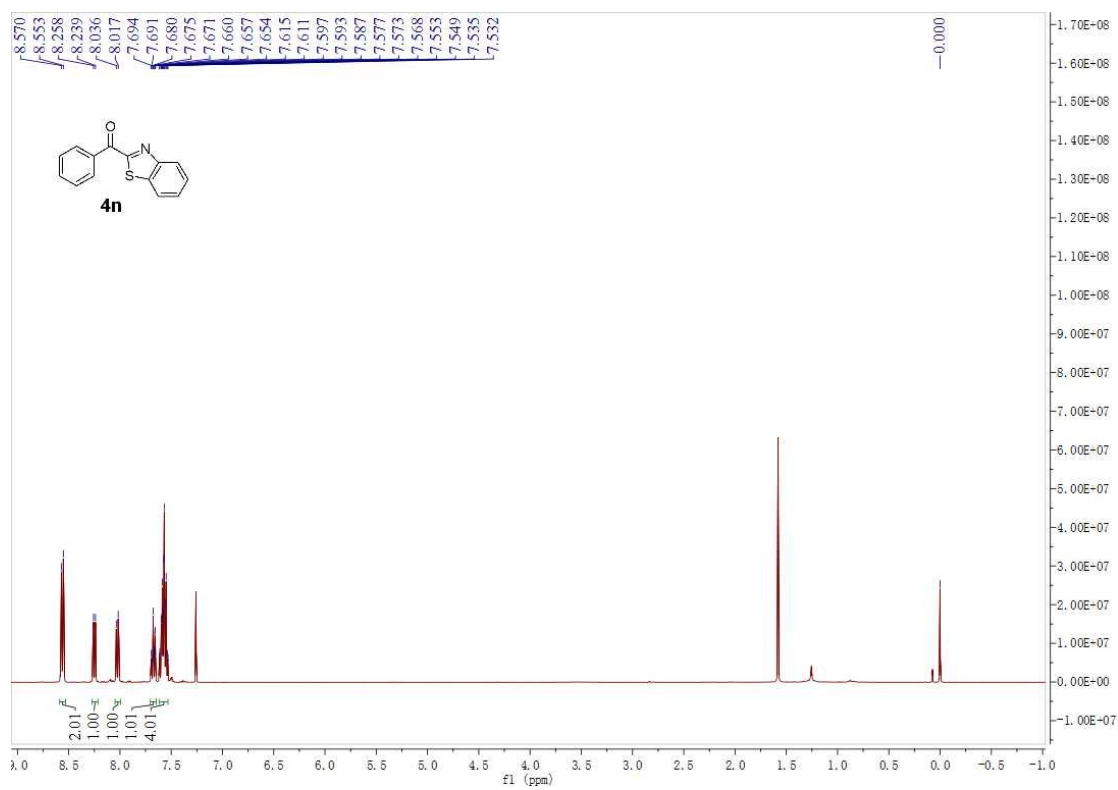

$^{13}\text{C}$  NMR (100 MHz,  $\text{CDCl}_3$ )

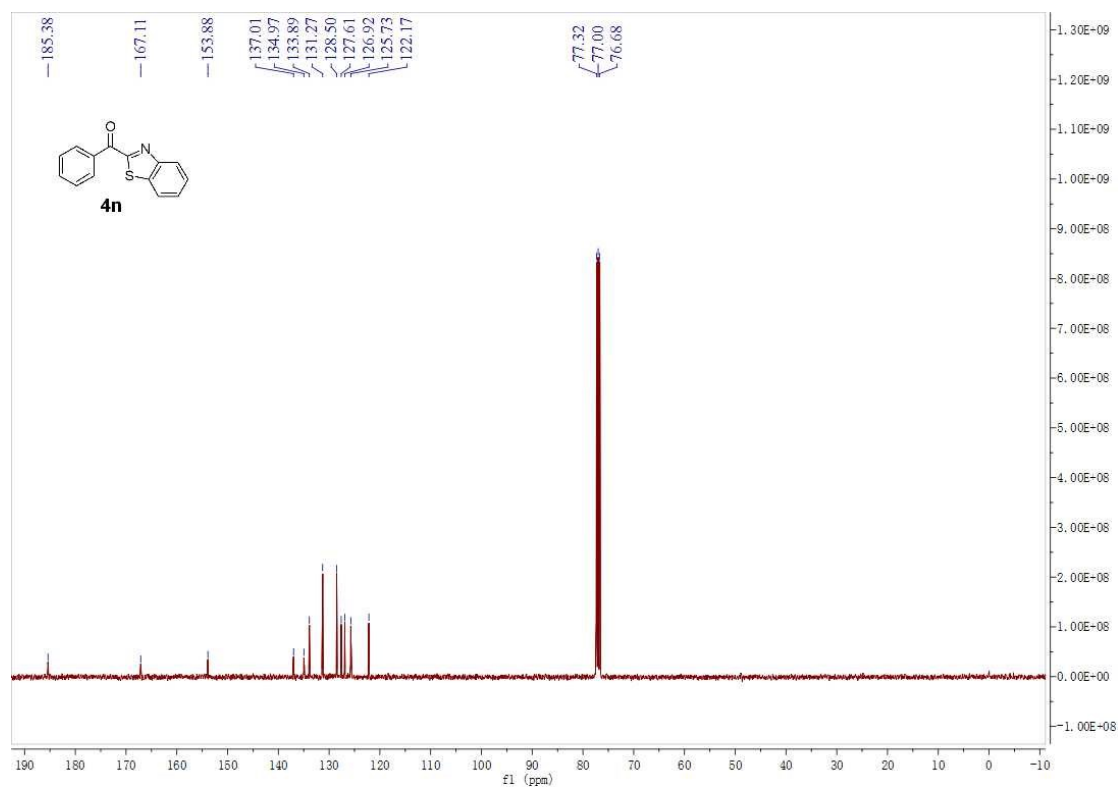

$^1\text{H}$  NMR (400 MHz,  $\text{CDCl}_3$ )

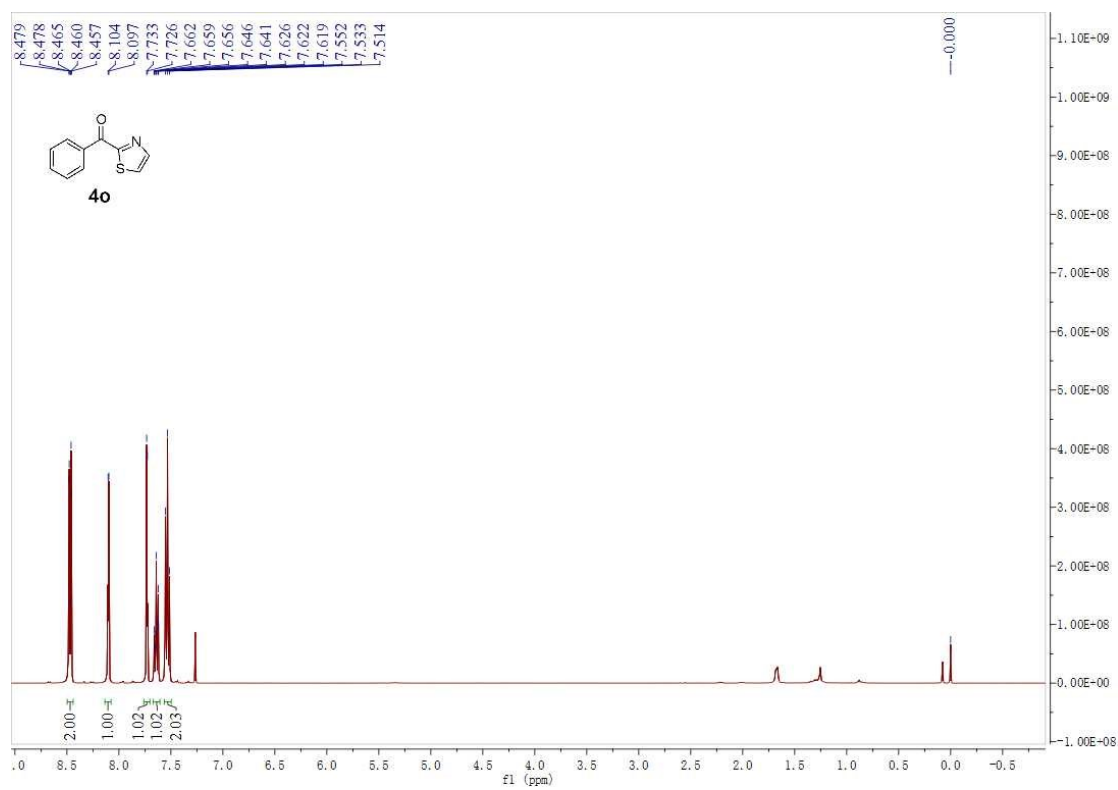

<sup>13</sup>C NMR (100 MHz, CDCl<sub>3</sub>)

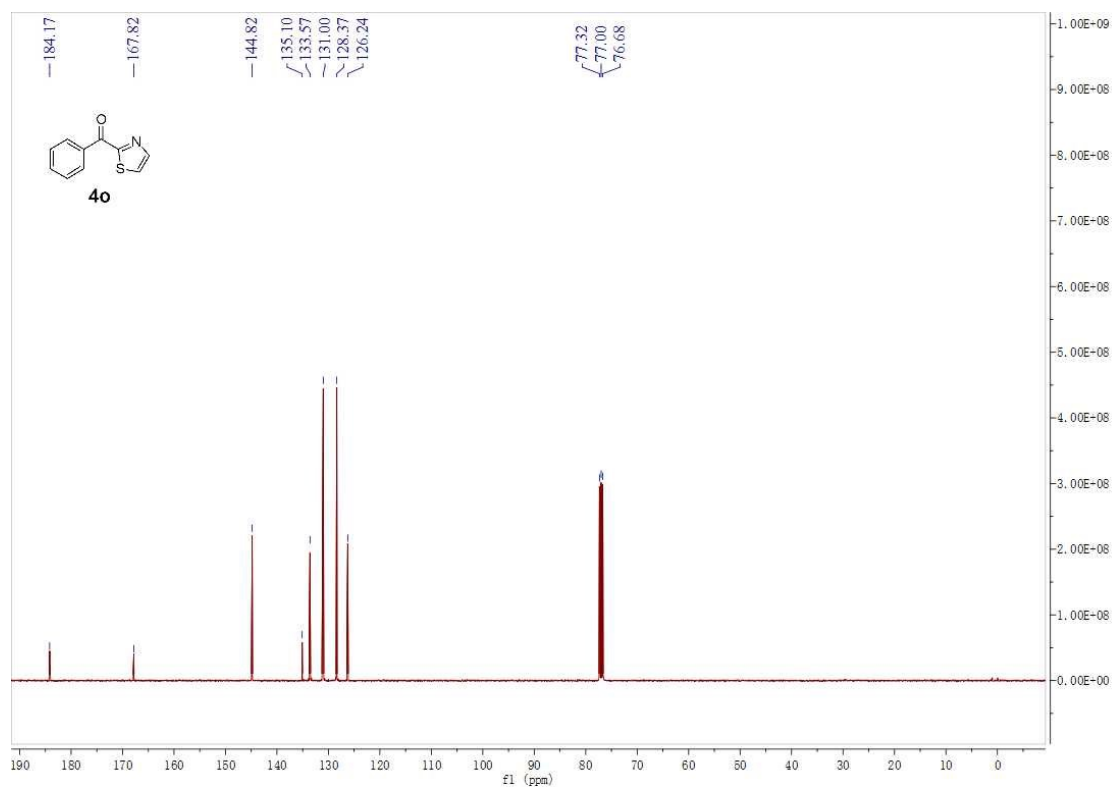

Supplement: d1qo00380a1.pdf [file d1qo00380a1.pdf]
